# Supplementary material for: The Indole-3-Acetamide-Induced Arabidopsis Transcription Factor MYB74 Decreases Plant Growth and Contributes to the Control of Osmotic Stress Responses
Source: Front Plant Sci. 2022 Jun 22;13:928386. doi: 10.3389/fpls.2022.928386 (PMC9257185; doi:10.3389/fpls.2022.928386)
Supplement: Supplementary file 2 [file Table_2.XLSX]

## Sheet: wt IAM vs wt ctrl
#-------------------------------------------------------------------------------
#Differentielly expressed genes from RNAseq
#p values adjustment: fdr
#FDR filtered (q-value < 0.05)
#Expression threshold (log2FC > 1)
#-------------------------------------------------------------------------------
GeneID	log2FC Ratio	FDR (adj. p-value)	Description
AT5G33251	9.10005	9.6e-15	| Symbols: | pseudogene of unknown protein | chr5:12499072-12500433 FORWARD LENGTH=1362
AT1G54040	8.42418	4.63e-09	| Symbols: ESP, TASTY | epithiospecifier protein | chr1:20170715-20173949 REVERSE LENGTH=1370
AT1G63540	4.47786	5.63e-05	| Symbols: | hydroxyproline-rich glycoprotein family protein | chr1:23566958-23569495 FORWARD LENGTH=1997
AT4G25230	4.27623	0.000323644	| Symbols: RIN2 | RPM1 interacting protein 2 | chr4:12923919-12929156 FORWARD LENGTH=2371
AT3G27250	3.53926	0.000184186	| Symbols: | unknown protein; BEST Arabidopsis thaliana protein match is: unknown protein (TAIR:AT5G40800.1); Has 104 Blast hits to 104 proteins in 13 species: Archae - 0; Bacteria - 0; Metazoa - 0; Fungi - 0; Plants - 104; Viruses - 0; Other Eukaryotes - 0 (source: NCBI BLink). | chr3:10061545-10062731 FORWARD LENGTH=1187
AT5G56080	3.36934	1.04e-05	| Symbols: ATNAS2, NAS2 | nicotianamine synthase 2 | chr5:22711402-22712364 REVERSE LENGTH=963
AT2G42540	3.18312	1.1e-38	| Symbols: COR15A, COR15 | cold-regulated 15a | chr2:17711032-17712092 REVERSE LENGTH=755
AT5G64401	3.12422	5.13e-06	| Symbols: | unknown protein; LOCATED IN: mitochondrion; Has 30201 Blast hits to 17322 proteins in 780 species: Archae - 12; Bacteria - 1396; Metazoa - 17338; Fungi - 3422; Plants - 5037; Viruses - 0; Other Eukaryotes - 2996 (source: NCBI BLink). | chr5:25750441-25750602 REVERSE LENGTH=162
AT1G14250	2.219	6.08e-20	| Symbols: | GDA1/CD39 nucleoside phosphatase family protein | chr1:4868452-4871488 FORWARD LENGTH=1846
AT5G44210	2.19134	0.000757938	| Symbols: ERF9, ATERF9, ATERF-9 | erf domain protein 9 | chr5:17806472-17807534 FORWARD LENGTH=1063
AT5G10410	2.04741	1.03e-06	| Symbols: | ENTH/ANTH/VHS superfamily protein | chr5:3271915-3273395 FORWARD LENGTH=1367
AT2G42530	2.0449	5.75e-12	| Symbols: COR15B | cold regulated 15b | chr2:17709036-17709945 REVERSE LENGTH=653
AT1G09350	2.0283	2.91e-08	| Symbols: AtGolS3, GolS3 | galactinol synthase 3 | chr1:3019819-3021441 FORWARD LENGTH=1301
AT2G15020	2.01133	3.95e-13	| Symbols: | unknown protein; BEST Arabidopsis thaliana protein match is: unknown protein (TAIR:AT5G64190.1); Has 72 Blast hits to 72 proteins in 10 species: Archae - 0; Bacteria - 0; Metazoa - 0; Fungi - 0; Plants - 72; Viruses - 0; Other Eukaryotes - 0 (source: NCBI BLink). | chr2:6491434-6493352 REVERSE LENGTH=1919
AT5G36910	2.00492	7.72e-09	| Symbols: THI2.2 | thionin 2.2 | chr5:14561817-14562750 REVERSE LENGTH=718
AT1G66100	1.8763	2.28e-13	| Symbols: | Plant thionin | chr1:24605671-24606537 REVERSE LENGTH=674
AT4G15440	1.85476	3.36e-05	| Symbols: HPL1, CYP74B2 | hydroperoxide lyase 1 | chr4:8835495-8838676 FORWARD LENGTH=1743
AT4G19170	1.8544	1.25e-48	| Symbols: NCED4, CCD4 | nine-cis-epoxycarotenoid dioxygenase 4 | chr4:10481786-10483857 FORWARD LENGTH=2072
AT1G60590	1.80472	1.7e-10	| Symbols: | Pectin lyase-like superfamily protein | chr1:22314170-22316970 REVERSE LENGTH=1982
AT4G21440	1.70432	4.76e-15	| Symbols: ATMYB102, ATM4, MYB102 | MYB-like 102 | chr4:11418246-11419760 REVERSE LENGTH=1340
AT2G04450	1.66799	1.51e-06	| Symbols: ATNUDT6, NUDX6, ATNUDX6, NUDT6 | nudix hydrolase homolog 6 | chr2:1543320-1545462 FORWARD LENGTH=1311
ATCG00020	1.65091	1.05e-58	| Symbols: PSBA | photosystem II reaction center protein A | chrC:383-1444 REVERSE LENGTH=1062
AT3G28220	1.5964	2.95e-38	| Symbols: | TRAF-like family protein | chr3:10524404-10526728 FORWARD LENGTH=1360
AT4G08170	1.53693	1.32e-43	| Symbols: | Inositol 1,3,4-trisphosphate 5/6-kinase family protein | chr4:5163399-5167179 REVERSE LENGTH=1549
AT4G03060	1.51908	5.3e-05	| Symbols: AOP2 | AOP2 (ALKENYL HYDROXALKYL PRODUCING 2); oxidoreductase, acting on paired donors, with incorporation or reduction of molecular oxygen, 2-oxoglutarate as one donor, and incorporation of one atom each of oxygen into both donors | chr4:1351980-1353854 REVERSE LENGTH=1267
ATCG00090	1.51229	0.000875678	| Symbols: TRNS.1 | tRNA-Ser | chrC:7785-7872 FORWARD LENGTH=88
AT2G36590	1.50889	1.68e-06	| Symbols: ProT3, ATPROT3 | proline transporter 3 | chr2:15343006-15345337 REVERSE LENGTH=1597
AT5G63450	1.50715	1.44e-106	| Symbols: CYP94B1 | cytochrome P450, family 94, subfamily B, polypeptide 1 | chr5:25408895-25410573 REVERSE LENGTH=1679
AT1G70640	1.4568	8.83e-08	| Symbols: | octicosapeptide/Phox/Bem1p (PB1) domain-containing protein | chr1:26636255-26637127 FORWARD LENGTH=765
AT4G05100	1.43579	7.01e-42	| Symbols: AtMYB74, MYB74 | myb domain protein 74 | chr4:2618454-2619887 FORWARD LENGTH=1175
AT1G52000	1.4334	2.57e-43	| Symbols: | Mannose-binding lectin superfamily protein | chr1:19333159-19336115 REVERSE LENGTH=2451
ATCG00280	1.42675	0	| Symbols: PSBC | photosystem II reaction center protein C | chrC:33720-35141 FORWARD LENGTH=1422
AT1G33960	1.41897	1.2e-08	| Symbols: AIG1 | P-loop containing nucleoside triphosphate hydrolases superfamily protein | chr1:12346232-12348513 FORWARD LENGTH=1453
AT1G73510	1.41373	0.00031486	| Symbols: | unknown protein; Has 7 Blast hits to 7 proteins in 2 species: Archae - 0; Bacteria - 0; Metazoa - 0; Fungi - 0; Plants - 7; Viruses - 0; Other Eukaryotes - 0 (source: NCBI BLink). | chr1:27642386-27643189 REVERSE LENGTH=804
AT2G40475	1.40802	0.000498591	| Symbols: | unknown protein; BEST Arabidopsis thaliana protein match is: unknown protein (TAIR:AT3G56260.2); Has 477 Blast hits to 219 proteins in 41 species: Archae - 0; Bacteria - 4; Metazoa - 91; Fungi - 61; Plants - 144; Viruses - 0; Other Eukaryotes - 177 (source: NCBI BLink). | chr2:16906911-16908128 REVERSE LENGTH=1218
AT2G17830	1.3917	6.22e-08	| Symbols: | F-box and associated interaction domains-containing protein | chr2:7754210-7755604 FORWARD LENGTH=1395
ATCG00290	1.37625	1.87e-12	| Symbols: TRNS.2 | tRNA-Ser | chrC:35312-35403 FORWARD LENGTH=92
AT3G55130	1.36685	1.02e-22	| Symbols: ATWBC19, WBC19 | white-brown complex homolog 19 | chr3:20433878-20436390 REVERSE LENGTH=2513
AT4G12000	1.3626	2.91e-29	| Symbols: | SNARE associated Golgi protein family | chr4:7193270-7195152 REVERSE LENGTH=1388
AT5G59220	1.35056	2.98e-13	| Symbols: HAI1 | highly ABA-induced PP2C gene 1 | chr5:23894404-23896619 REVERSE LENGTH=1632
AT5G24420	1.34175	1.13e-29	| Symbols: PGL5 | 6-phosphogluconolactonase 5 | chr5:8336614-8338008 REVERSE LENGTH=1217
AT3G25770	1.32626	0	| Symbols: AOC2 | allene oxide cyclase 2 | chr3:9406873-9407955 FORWARD LENGTH=980
AT4G10265	1.32514	0.000238183	| Symbols: | Wound-responsive family protein | chr4:6373097-6373536 REVERSE LENGTH=440
AT3G18950	1.31909	3e-36	| Symbols: | Transducin/WD40 repeat-like superfamily protein | chr3:6536715-6538658 FORWARD LENGTH=1944
AT3G20395	1.31835	8.11e-08	| Symbols: | RING/U-box superfamily protein | chr3:7111948-7113870 REVERSE LENGTH=822
AT5G24770	1.30939	3.64e-06	| Symbols: VSP2, ATVSP2 | vegetative storage protein 2 | chr5:8500476-8502224 REVERSE LENGTH=1415
AT1G18710	1.29733	4.06e-13	| Symbols: AtMYB47, MYB47 | myb domain protein 47 | chr1:6450594-6453114 FORWARD LENGTH=1119
AT1G10560	1.27623	5.66e-07	| Symbols: PUB18, ATPUB18 | plant U-box 18 | chr1:3484580-3486965 FORWARD LENGTH=2386
AT1G02820	1.25749	5.39e-08	| Symbols: | Late embryogenesis abundant 3 (LEA3) family protein | chr1:623765-624475 REVERSE LENGTH=615
AT5G55090	1.24708	1.36e-07	| Symbols: MAPKKK15 | mitogen-activated protein kinase kinase kinase 15 | chr5:22356852-22358198 REVERSE LENGTH=1347
AT3G55500	1.23183	0.000366342	| Symbols: ATEXPA16, EXP16, ATEXP16, ATHEXP ALPHA 1.7, EXPA16 | expansin A16 | chr3:20574831-20576182 REVERSE LENGTH=1105
AT3G56090	1.22267	1.75e-56	| Symbols: ATFER3, FER3 | ferritin 3 | chr3:20814047-20816035 REVERSE LENGTH=1134
AT5G52400	1.22058	0.000154455	| Symbols: CYP715A1 | cytochrome P450, family 715, subfamily A, polypeptide 1 | chr5:21272949-21275509 FORWARD LENGTH=1560
AT3G24460	1.20706	1.48e-05	| Symbols: | Serinc-domain containing serine and sphingolipid biosynthesis protein | chr3:8885818-8893050 REVERSE LENGTH=1976
AT5G54300	1.20401	4.14e-49	| Symbols: | Protein of unknown function (DUF761) | chr5:22053969-22055430 REVERSE LENGTH=1370
AT4G38810	1.19574	1.31e-14	| Symbols: | Calcium-binding EF-hand family protein | chr4:18115283-18119077 REVERSE LENGTH=1669
AT1G02340	1.19531	0.000675249	| Symbols: HFR1, RSF1, FBI1, REP1 | basic helix-loop-helix (bHLH) DNA-binding superfamily protein | chr1:465718-467844 REVERSE LENGTH=1253
AT4G04840	1.18736	1.26e-08	| Symbols: ATMSRB6, MSRB6 | methionine sulfoxide reductase B6 | chr4:2449560-2451589 FORWARD LENGTH=848
ATCG00270	1.18663	0	| Symbols: PSBD | photosystem II reaction center protein D | chrC:32711-33772 FORWARD LENGTH=1062
AT1G29395	1.18286	4.34e-33	| Symbols: COR414-TM1, COR413IM1, COR413-TM1 | COLD REGULATED 314 INNER MEMBRANE 1 | chr1:10288197-10289621 REVERSE LENGTH=908
AT1G26770	1.16189	0.000142201	| Symbols: ATEXPA10, AT-EXP10, ATEXP10, ATHEXP ALPHA 1.1, EXP10, EXPA10 | expansin A10 | chr1:9259605-9261313 FORWARD LENGTH=1366
AT5G47240	1.16047	7.19e-73	| Symbols: atnudt8, NUDT8 | nudix hydrolase homolog 8 | chr5:19183601-19185644 FORWARD LENGTH=1492
AT5G45950	1.14694	2.97e-07	| Symbols: | GDSL-like Lipase/Acylhydrolase superfamily protein | chr5:18634079-18636699 FORWARD LENGTH=1337
ATCG01100	1.1417	1.09e-15	| Symbols: NDHA | NADH dehydrogenase family protein | chrC:119847-122009 REVERSE LENGTH=1083
ATCG00730	1.13872	0.000144173	| Symbols: PETD | photosynthetic electron transfer D | chrC:76481-77672 FORWARD LENGTH=483
AT1G53470	1.1359	2.11e-16	| Symbols: MSL4 | mechanosensitive channel of small conductance-like 4 | chr1:19958587-19961578 FORWARD LENGTH=2646
AT4G15550	1.13145	1.96e-81	| Symbols: IAGLU | indole-3-acetate beta-D-glucosyltransferase | chr4:8877590-8879327 REVERSE LENGTH=1738
AT1G15430	1.13062	4.52e-05	| Symbols: | Protein of unknown function (DUF1644) | chr1:5304317-5306012 FORWARD LENGTH=1136
AT1G61120	1.12886	3.34e-27	| Symbols: TPS04, GES, TPS4 | terpene synthase 04 | chr1:22523637-22528811 FORWARD LENGTH=2899
AT4G33930	1.12214	1.45e-07	| Symbols: | Cupredoxin superfamily protein | chr4:16264389-16265420 REVERSE LENGTH=1032
AT5G52310	1.10547	0	| Symbols: COR78, LTI78, RD29A, LTI140 | low-temperature-responsive protein 78 (LTI78) / desiccation-responsive protein 29A (RD29A) | chr5:21240849-21243613 FORWARD LENGTH=2500
AT1G56600	1.1024	5.53e-07	| Symbols: AtGolS2, GolS2 | galactinol synthase 2 | chr1:21207537-21209596 FORWARD LENGTH=1396
AT5G40390	1.09813	1.75e-11	| Symbols: SIP1 | Raffinose synthase family protein | chr5:16161515-16165357 FORWARD LENGTH=2829
AT5G08350	1.09726	0.000145097	| Symbols: | GRAM domain-containing protein / ABA-responsive protein-related | chr5:2686245-2687251 REVERSE LENGTH=917
AT5G64770	1.08262	9.3e-08	| Symbols: RGF9 | Encodes a root meristem growth factor (RGF). Belongs to a family of functionally redundant homologous peptides that are secreted, tyrosine-sulfated, and expressed mainly in the stem cell area and the innermost layer of central columella cells. RGFs are required for maintenance of the root stem cell niche and transit amplifying cell proliferation. Members of this family include: …
ATCG01050	1.07863	0.000144723	| Symbols: NDHD | NADH-Ubiquinone/plastoquinone (complex I) protein | chrC:115665-117185 REVERSE LENGTH=1521
AT3G21670	1.07283	1.46e-28	| Symbols: | Major facilitator superfamily protein | chr3:7626757-7629151 REVERSE LENGTH=2155
AT1G05100	1.06833	5.53e-40	| Symbols: MAPKKK18 | mitogen-activated protein kinase kinase kinase 18 | chr1:1469610-1470881 FORWARD LENGTH=1272
AT1G30820	1.06807	1.57e-39	| Symbols: | CTP synthase family protein | chr1:10944913-10949458 REVERSE LENGTH=2480
AT1G73480	1.0512	2.84e-76	| Symbols: | alpha/beta-Hydrolases superfamily protein | chr1:27628939-27632806 FORWARD LENGTH=2039
ATCG00040	1.04176	2.44e-05	| Symbols: MATK | maturase K | chrC:2056-3636 REVERSE LENGTH=1581
AT2G39980	1.0371	4.27e-19	| Symbols: | HXXXD-type acyl-transferase family protein | chr2:16687673-16689956 REVERSE LENGTH=2284
AT5G17700	1.03325	1.68e-06	| Symbols: | MATE efflux family protein | chr5:5830581-5833901 REVERSE LENGTH=2116
AT1G68570	1.02609	1.36e-11	| Symbols: | Major facilitator superfamily protein | chr1:25746736-25750275 FORWARD LENGTH=2031
AT1G18460	1.0252	5.29e-21	| Symbols: | alpha/beta-Hydrolases superfamily protein | chr1:6352470-6356113 FORWARD LENGTH=2460
AT4G33905	1.02247	1.03e-09	| Symbols: | Peroxisomal membrane 22 kDa (Mpv17/PMP22) family protein | chr4:16253815-16255612 REVERSE LENGTH=1056
AT1G02390	1.01959	0.000245758	| Symbols: ATGPAT2, GPAT2 | glycerol-3-phosphate acyltransferase 2 | chr1:480852-483292 FORWARD LENGTH=1791
AT1G21790	1.01015	1.47e-11	| Symbols: | TRAM, LAG1 and CLN8 (TLC) lipid-sensing domain containing protein | chr1:7654184-7655883 FORWARD LENGTH=1232
AT1G01030	1.00807	4.52e-06	| Symbols: NGA3 | AP2/B3-like transcriptional factor family protein | chr1:11649-13714 REVERSE LENGTH=1905
AT2G36750	1.00715	3.61e-05	| Symbols: UGT73C1 | UDP-glucosyl transferase 73C1 | chr2:15410462-15412038 REVERSE LENGTH=1577

## Sheet: ami1 IAM vs wt ctrl
#-------------------------------------------------------------------------------
#Differentielly expressed genes from RNAseq
#p values adjustment: fdr
#FDR filtered (q-value < 0.05)
#Expression threshold (log2FC > 1)
#-------------------------------------------------------------------------------
GeneID	log2FC Ratio	FDR (adj. p-value)	Description
AT3G01345	10.1328	7.5e-65	gi|42572219|ref|NP_974204.1|/0/uncharacterized protein [Arabidopsis thaliana]
AT1G53480	9.64614	5.39e-19	gi|15220794|ref|NP_175753.1|/5.05065e-107/mto 1 responding down 1 protein [Arabidopsis thaliana]
AT1G80340	7.00793	1.69e-05	gi|15220117|ref|NP_178150.1|/0/gibberellin 3-beta-dioxygenase 2 [Arabidopsis thaliana]
AT5G24240	6.10288	7.08e-05	gi|15237921|ref|NP_197812.1|/0/phosphatidylinositol 3- and 4-kinase / ubiquitin family protein [Arabidopsis thaliana]
AT1G66390	4.58654	1.04e-05	gi|15219651|ref|NP_176813.1|/2.89366e-147/transcription factor MYB90 [Arabidopsis thaliana]
AT3G11480	4.19422	4.34e-08	gi|22330992|ref|NP_187755.2|/0/SABATH methyltransferase BSMT1 [Arabidopsis thaliana]
AT2G27420	3.93838	7.22e-16	gi|18401420|ref|NP_565649.1|/0/cysteine proteinase-like protein [Arabidopsis thaliana]
AT2G34080	3.77918	3.96e-11	gi|18403438|ref|NP_565780.1|/0/cysteine proteinase-like protein [Arabidopsis thaliana]
AT4G34550	3.51615	0.000117025	gi|15236147|ref|NP_195181.1|/1.02849e-162/uncharacterized protein [Arabidopsis thaliana]
AT1G02820	3.41145	1.61e-19	gi|15218614|ref|NP_171781.1|/3.9905e-44/late embryogenesis abundant 3-like protein [Arabidopsis thaliana]
AT3G26320	3.36415	0.000406697	gi|15231541|ref|NP_189263.1|/0/cytochrome P450 71B36 [Arabidopsis thaliana]
AT2G15020	3.36415	2.48e-22	gi|15226043|ref|NP_179106.1|/0/uncharacterized protein [Arabidopsis thaliana]
AT1G73325	3.33173	2.91e-09	gi|18410332|ref|NP_565062.1|/5.23304e-123/Kunitz family trypsin and protease inhibitor protein [Arabidopsis thaliana]
AT3G27970	3.28168	0.000753072	gi|79422951|ref|NP_189436.2|/0/exonuclease-like protein [Arabidopsis thaliana]
AT5G54585	3.28168	1.57e-10	gi|22327834|ref|NP_680435.1|/4.10984e-70/uncharacterized protein [Arabidopsis thaliana]
AT1G51780	3.26461	5.44e-17	gi|15218029|ref|NP_175589.1|/0/IAA-amino acid hydrolase ILR1-like 5 [Arabidopsis thaliana]
AT3G02480	3.24369	2.13e-70	gi|18396202|ref|NP_566173.1|/2.2575e-31/Late embryogenesis abundant protein (LEA) family protein [Arabidopsis thaliana]
AT1G01060	3.22498	1.03e-46	gi|15223290|ref|NP_171614.1|/0/protein LHY [Arabidopsis thaliana]
AT4G21440	3.21457	5.39e-70	gi|18415694|ref|NP_567626.1|/0/R2R3 family MYB transcription factor [Arabidopsis thaliana]
AT1G52690	3.17105	3.24e-155	gi|15219071|ref|NP_175678.1|/8.79758e-90/Late embryogenesis abundant protein (LEA) family protein [Arabidopsis thaliana]
AT5G24080	3.13282	7.79e-05	gi|18420747|ref|NP_568438.1|/0/G-type lectin S-receptor-like serine/threonine protein kinase [Arabidopsis thaliana]
AT3G29590	3.08175	2.34e-07	gi|15230013|ref|NP_189600.1|/0/malonyl-CoA:anthocyanidin 5-O-glucoside-6"-O-malonyltransferase [Arabidopsis thaliana]
AT1G04220	3.04805	1.3e-64	gi|15219676|ref|NP_171918.1|/0/3-ketoacyl-CoA synthase 2 [Arabidopsis thaliana]
AT3G28220	3.01224	1.98e-199	gi|15232931|ref|NP_189462.1|/0/TRAF-like family protein [Arabidopsis thaliana]
AT5G24150	2.99666	4.38e-107	gi|15237902|ref|NP_197803.1|/0/Squalene monooxygenase 5 [Arabidopsis thaliana]
AT4G24700	2.96681	7.99e-08	gi|15233938|ref|NP_194201.1|/3.01825e-76/uncharacterized protein [Arabidopsis thaliana]
AT5G48010	2.87229	4.85e-06	gi|145334775|ref|NP_001078733.1|/0/thalianol synthase 1 [Arabidopsis thaliana]
AT3G21670	2.85365	1.69e-141	gi|15233123|ref|NP_188804.1|/0/nitrate transporter 1.3 [Arabidopsis thaliana]
AT3G27810	2.83808	8.6e-05	gi|30688935|ref|NP_189418.2|/4.38234e-133/transcription factor MYB21 [Arabidopsis thaliana]
AT2G28190	2.8125	2.5e-112	gi|18401659|ref|NP_565666.1|/2.69918e-121/copper/zinc superoxide dismutase 2 [Arabidopsis thaliana]
AT1G69480	2.80635	6.88e-119	gi|42563076|ref|NP_177107.2|/0/EXS (ERD1/XPR1/SYG1) family protein [Arabidopsis thaliana]
AT3G09600	2.78624	6.22e-35	gi|30680926|ref|NP_187571.2|/1.06852e-168/MYB-like transcription factor [Arabidopsis thaliana]
AT1G62760	2.77918	0.000153359	gi|30696750|ref|NP_176463.2|/2.46456e-171/plant invertase/pectin methylesterase inhibitor domain-containing protein [Arabidopsis thaliana]
AT2G41240	2.75222	7.65e-27	gi|15227308|ref|NP_181657.1|/8.24377e-136/transcription factor bHLH100 [Arabidopsis thaliana]
AT1G05680	2.71979	1.37e-266	gi|15221233|ref|NP_172059.1|/0/Uridine diphosphate glycosyltransferase 74E2 [Arabidopsis thaliana]
AT5G54060	2.70202	2.93e-15	gi|15239543|ref|NP_200217.1|/0/anthocyanidin 3-O-glucoside 2'''-O-xylosyltransferase [Arabidopsis thaliana]
AT4G37990	2.68287	5.42e-73	gi|15233643|ref|NP_195512.1|/0/cinnamyl alcohol dehydrogenase 8 [Arabidopsis thaliana]
AT5G53200	2.62718	8.84e-05	gi|30696297|ref|NP_200132.2|/4.80004e-58/transcription factor TRY [Arabidopsis thaliana]
AT4G37150	2.62306	1.73e-11	gi|15235445|ref|NP_195432.1|/2.11615e-148/methyl esterase 9 [Arabidopsis thaliana]
AT3G21660	2.58654	0.000843318	gi|15233121|ref|NP_188803.1|/0/UBX domain-containing protein [Arabidopsis thaliana]
AT5G10930	2.58124	5.51e-11	gi|30683398|ref|NP_568241.2|/0/CBL-interacting protein kinase 5 [Arabidopsis thaliana]
AT3G52740	2.55252	3.19e-37	gi|18409685|ref|NP_566972.1|/1.73135e-76/uncharacterized protein [Arabidopsis thaliana]
AT4G36700	2.54214	5.45e-09	gi|30690736|ref|NP_195388.2|/0/cupin family protein [Arabidopsis thaliana]
AT2G37770	2.53547	8.93e-69	gi|255311879|pdb|3H7U|A/0/Chain A, Crystal Structure Of The Plant Stress-Response Enzyme Akr4c9
AT5G09570	2.51615	0.000269653	gi|15242455|ref|NP_196519.1|/5.97196e-77/Cox19-like CHCH family protein [Arabidopsis thaliana]
AT1G60590	2.46271	9.82e-24	gi|42562835|ref|NP_564758.2|/0/pectin lyase-like protein [Arabidopsis thaliana]
AT1G73390	2.43611	2.45e-216	gi|15219459|ref|NP_177482.1|/0/Endosomal targeting BRO1-like domain-containing protein [Arabidopsis thaliana]
AT2G14580	2.41661	0.00014828	gi|15225965|ref|NP_179064.1|/9.6152e-93/pathogenesis-related protein 1 [Arabidopsis thaliana]
AT3G56970	2.40835	5.29e-17	gi|15230177|ref|NP_191256.1|/1.4355e-141/transcription factor ORG2 [Arabidopsis thaliana]
AT5G50360	2.39586	0.000801195	gi|15240662|ref|NP_199847.1|/4.16159e-170/uncharacterized protein [Arabidopsis thaliana]
AT3G56980	2.38405	9.02e-11	gi|15230178|ref|NP_191257.1|/1.10329e-144/transcription factor ORG3 [Arabidopsis thaliana]
AT2G33380	2.35486	0	gi|15226103|ref|NP_180896.1|/2.08547e-136/caleosin 3 [Arabidopsis thaliana]
AT1G48100	2.3402	2.29e-33	gi|15221078|ref|NP_175244.1|/0/polygalacturonase [Arabidopsis thaliana]
AT5G48850	2.32725	7.37e-27	gi|9758884|dbj|BAB09438.1|/2.54776e-173/unnamed protein product [Arabidopsis thaliana]
AT2G36770	2.32075	2.49e-18	gi|15228033|ref|NP_181215.1|/0/UDP-glucosyl transferase 73C4 [Arabidopsis thaliana]
AT1G01520	2.30114	4.55e-08	gi|8920588|gb|AAF81310.1|AC061957_6/1.88627e-167/Contains similarity to a dehydrogenase from Arabidopsis thaliana gb|Y12776 and contains a D-isomer specific 2-hydroxyacid dehydrogenases PF|00389 and Myb-like DNA binding PF|00249 domains. ESTs gb|Z48385, gb|Z48386 come from this gene [Arabidopsis thaliana]
AT2G21320	2.29376	1.44e-08	gi|18399657|ref|NP_565507.1|/1.38551e-101/B-box zinc finger family protein [Arabidopsis thaliana]
AT5G17390	2.27514	7.82e-08	gi|15237955|ref|NP_197241.1|/4.91359e-160/Adenine nucleotide alpha hydrolases-like superfamily protein [Arabidopsis thaliana]
AT2G46370	2.26723	0	gi|334184935|ref|NP_001189757.1|/0/jasmonic acid-amido synthetase JAR1 [Arabidopsis thaliana]
AT5G25130	2.26461	2.25e-14	gi|15238717|ref|NP_197895.1|/0/cytochrome P450 71B12 [Arabidopsis thaliana]
AT1G13080	2.23687	6.61e-14	gi|15222174|ref|NP_172767.1|/0/cytochrome P450 71B2 [Arabidopsis thaliana]
AT5G59220	2.23062	2.06e-73	gi|75170815|sp|Q9FIF5.1|P2C78_ARATH/0/RecName: Full=Probable protein phosphatase 2C 78; Short=AtPP2C78 [Arabidopsis thaliana]
AT5G42760	2.20752	1.87e-14	gi|334188152|ref|NP_001190454.1|/0/leucine carboxyl methyltransferase [Arabidopsis thaliana]
AT2G36590	2.2061	6.12e-63	gi|15228000|ref|NP_181198.1|/0/proline transporter 3 [Arabidopsis thaliana]
AT3G28270	2.19929	8.67e-37	gi|18405710|ref|NP_566836.1|/0/uncharacterized protein [Arabidopsis thaliana]
AT3G48240	2.19422	0.000390395	gi|15228362|ref|NP_190407.1|/1.55924e-101/Octicosapeptide/Phox/Bem1p family protein [Arabidopsis thaliana]
AT4G16690	2.17637	8.7e-31	gi|15235844|ref|NP_193402.1|/9.49026e-152/methyl esterase 16 [Arabidopsis thaliana]
AT5G37300	2.17404	1.97e-09	gi|9758716|dbj|BAB09102.1|/0/unnamed protein product [Arabidopsis thaliana]
AT3G16175	2.15358	6.61e-05	gi|18401037|ref|NP_566538.1|/8.43687e-83/thioesterase family protein [Arabidopsis thaliana]
AT1G09350	2.15325	8.56e-61	gi|15217486|ref|NP_172406.1|/0/galactinol synthase 3 [Arabidopsis thaliana]
AT3G17130	2.13764	8.44e-13	gi|15228972|ref|NP_188338.1|/7.59916e-99/plant invertase/pectin methylesterase inhibitor domain-containing protein [Arabidopsis thaliana]
AT1G07500	2.12496	5.67e-08	gi|15222430|ref|NP_172230.1|/3.19559e-38/uncharacterized protein [Arabidopsis thaliana]
AT5G17300	2.12451	4.04e-25	gi|42567912|ref|NP_568344.2|/0/myb family transcription factor RVE1 [Arabidopsis thaliana]
AT5G15850	2.10893	1.28e-123	gi|15242403|ref|NP_197089.1|/0/zinc finger protein CONSTANS-LIKE 1 [Arabidopsis thaliana]
AT2G32530	2.10111	1e-16	gi|30685335|ref|NP_850190.1|/0/cellulose synthase-like protein B3 [Arabidopsis thaliana]
AT2G46680	2.09789	2.26e-94	gi|15226424|ref|NP_182191.1|/1.03025e-150/homeobox-leucine zipper protein ATHB-7 [Arabidopsis thaliana]
AT2G32540	2.09692	4.08e-21	gi|15225704|ref|NP_180813.1|/0/cellulose synthase-like protein B4 [Arabidopsis thaliana]
AT1G12030	2.09234	1.84e-05	gi|15221175|ref|NP_172667.1|/1.12171e-170/uncharacterized protein [Arabidopsis thaliana]
AT2G45570	2.06657	3.43e-27	gi|15225512|ref|NP_182081.1|/0/cytochrome P450 76C2 [Arabidopsis thaliana]
AT1G69490	2.06258	6.38e-19	gi|18409291|ref|NP_564966.1|/2.8755e-159/NAC transcription factor protein family [Arabidopsis thaliana]
AT1G07430	2.0522	1.57e-27	gi|15222398|ref|NP_172223.1|/0/protein phosphatase 2C 3 [Arabidopsis thaliana]
AT2G31380	2.03925	2.44e-45	gi|18402646|ref|NP_565722.1|/5.3972e-140/B-box zinc finger protein STH [Arabidopsis thaliana]
AT3G46670	2.02683	1.15e-109	gi|15232618|ref|NP_190251.1|/0/UDP-glucosyl transferase 76E11 [Arabidopsis thaliana]
AT5G24155	2.01525	1.38e-06	gi|22327022|ref|NP_680214.1|/1.85593e-62/FAD/NAD(P)-binding oxidoreductase family protein [Arabidopsis thaliana]
AT3G02380	1.996	1.72e-58	gi|15232898|ref|NP_186887.1|/0/zinc finger protein CONSTANS-LIKE 2 [Arabidopsis thaliana]
AT2G44810	1.99069	6.19e-08	gi|75331973|sp|Q948R1.1|PLA11_ARATH/0/RecName: Full=Phospholipase A(1) DAD1, chloroplastic; AltName: Full=Phospholipase A1-Ibeta1; AltName: Full=Protein DEFECTIVE IN ANTHER DEHISCENCE 1; Short=AtDAD1; Flags: Precursor
AT2G46830	1.96973	4.2e-87	gi|30690518|ref|NP_850460.1|/0/protein CCA1 [Arabidopsis thaliana]
AT1G52000	1.96577	1.01e-127	gi|15218112|ref|NP_175612.1|/0/mannose-binding lectin superfamily protein [Arabidopsis thaliana]
AT5G06760	1.96344	1.4e-43	gi|15240144|ref|NP_196294.1|/1.28848e-86/late embryogenesis abundant protein 4-5 [Arabidopsis thaliana]
AT1G13650	1.95726	1.13e-63	gi|30683402|ref|NP_849655.1|/2.89874e-160/uncharacterized protein [Arabidopsis thaliana]
AT4G33467	1.95012	5.27e-20	gi|145334209|ref|NP_001078485.1|/7.26548e-54/uncharacterized protein [Arabidopsis thaliana]
AT2G36780	1.9482	3.74e-22	gi|15228034|ref|NP_181216.1|/0/UDP-glucosyl transferase 73C3 [Arabidopsis thaliana]
AT3G46660	1.94567	3.28e-120	gi|18408251|ref|NP_566885.1|/0/UDP-glucosyl transferase 76E12 [Arabidopsis thaliana]
AT1G55960	1.94515	1.89e-79	gi|18405618|ref|NP_564705.1|/0/putative polyketide cyclase/dehydrase and lipid transport-like protein [Arabidopsis thaliana]
AT3G22840	1.92694	8.04e-37	gi|15228866|ref|NP_188923.1|/7.49294e-106/chlorophyll A-B binding, early light-inducible protein [Arabidopsis thaliana]
AT1G53470	1.92195	2.25e-50	gi|15220793|ref|NP_175752.1|/0/mechanosensitive channel of small conductance-like 4 [Arabidopsis thaliana]
AT1G72770	1.91897	2.82e-88	gi|15218595|ref|NP_177421.1|/0/protein phosphatase 2C 16 [Arabidopsis thaliana]
AT4G01080	1.90117	3.28e-12	gi|15234058|ref|NP_192017.1|/0/protein TRICHOME BIREFRINGENCE-LIKE 26 [Arabidopsis thaliana]
AT1G19670	1.90062	7.57e-122	gi|18394772|ref|NP_564094.1|/0/chlorophyllase 1 [Arabidopsis thaliana]
AT4G14090	1.89466	4.53e-10	gi|15236407|ref|NP_193146.1|/0/anthocyanin 5-O-glucosyltransferase [Arabidopsis thaliana]
AT3G05936	1.89466	0.000111865	gi|116830283|gb|ABK28099.1|/2.10757e-61/unknown [Arabidopsis thaliana]
AT1G56650	1.89195	1.99e-14	gi|15223582|ref|NP_176057.1|/7.55399e-148/transcription factor MYB75 [Arabidopsis thaliana]
AT3G14810	1.86548	8.5e-144	gi|186510070|ref|NP_188099.2|/0/mechanosensitive channel of small conductance-like 5 [Arabidopsis thaliana]
AT3G44990	1.85502	2.79e-34	gi|15230574|ref|NP_190085.1|/1.22268e-177/xyloglucan endotransglucosylase/hydrolase [Arabidopsis thaliana]
AT2G34810	1.84931	4.86e-56	gi|15226834|ref|NP_181027.1|/0/FAD-binding and BBE domain-containing protein [Arabidopsis thaliana]
AT5G39660	1.82499	1.28e-19	gi|18421891|ref|NP_568567.1|/0/cycling DOF factor 2 [Arabidopsis thaliana]
AT1G21790	1.82124	2.37e-90	gi|18395035|ref|NP_564152.1|/2.92817e-168/TRAM, LAG1 and CLN8 (TLC) lipid-sensing domain containing protein [Arabidopsis thaliana]
AT5G45950	1.81973	8.64e-83	gi|15237350|ref|NP_199407.1|/0/GDSL esterase/lipase [Arabidopsis thaliana]
AT1G65620	1.81871	0.000285859	gi|15218746|ref|NP_176739.1|/3.84389e-113/protein ASYMMETRIC LEAVES 2 [Arabidopsis thaliana]
AT4G01430	1.81871	6.92e-08	gi|15234179|ref|NP_192052.1|/0/nodulin MtN21-like transporter family protein [Arabidopsis thaliana]
AT5G13170	1.80863	1.1e-29	gi|15240040|ref|NP_196821.1|/1.10435e-162/senescence-associated protein 29 [Arabidopsis thaliana]
AT4G14690	1.79756	6.41e-16	gi|18414282|ref|NP_567438.1|/2.77139e-105/early light-inducible protein 2 [Arabidopsis thaliana]
AT1G52565	1.79391	1.18e-19	gi|42570094|ref|NP_683424.2|/2.97628e-68/uncharacterized protein [Arabidopsis thaliana]
AT4G39510	1.77918	6.29e-13	gi|15235108|ref|NP_195661.1|/0/cytochrome P450, family 96, subfamily A, polypeptide 12 [Arabidopsis thaliana]
AT3G02010	1.77918	1.76e-09	gi|15232837|ref|NP_186850.1|/0/pentatricopeptide repeat-containing protein [Arabidopsis thaliana]
AT3G58990	1.77293	1.7e-22	gi|15231608|ref|NP_191458.1|/1.29835e-142/isopropylmalate isomerase 1 [Arabidopsis thaliana]
AT3G11660	1.75376	4.74e-64	gi|18399308|ref|NP_566396.1|/2.76206e-120/NDR1/HIN1-Like protein 1 [Arabidopsis thaliana]
AT1G64500	1.74782	4.36e-26	gi|15217659|ref|NP_176631.1|/0/glutaredoxin-like protein [Arabidopsis thaliana]
AT3G22100	1.74676	0.000101272	gi|15233267|ref|NP_188848.1|/3.17316e-141/transcription factor bHLH117 [Arabidopsis thaliana]
AT2G36690	1.74442	0.000193466	gi|42569681|ref|NP_181207.2|/0/2-oxoglutarate (2OG) and Fe(II)-dependent oxygenase superfamily protein [Arabidopsis thaliana]
AT4G22880	1.74071	1.61e-31	gi|15235853|ref|NP_194019.1|/0/leucoanthocyanidin dioxygenase [Arabidopsis thaliana]
AT5G38940	1.73264	3.19e-06	gi|145358636|ref|NP_198710.2|/1.70025e-121/germin-like protein subfamily 1 member 11 [Arabidopsis thaliana]
AT5G10410	1.73149	1.52e-11	gi|15238149|ref|NP_196603.1|/0/ENTH/ANTH/VHS superfamily protein [Arabidopsis thaliana]
AT1G62420	1.71968	2.99e-09	gi|145336945|ref|NP_176432.2|/3.58982e-163/uncharacterized protein [Arabidopsis thaliana]
AT3G47430	1.71931	4.06e-22	gi|15232797|ref|NP_190327.1|/7.31055e-128/peroxisomal membrane protein 11B [Arabidopsis thaliana]
AT1G04570	1.71664	5.83e-15	gi|30678917|ref|NP_171951.2|/0/probable folate-biopterin transporter [Arabidopsis thaliana]
AT5G47330	1.7155	3.45e-65	gi|15238063|ref|NP_199544.1|/0/palmitoyl protein thioesterase family protein [Arabidopsis thaliana]
AT1G52890	1.71313	6.69e-170	gi|15219112|ref|NP_175697.1|/0/NAC domain-containing protein 19 [Arabidopsis thaliana]
AT1G23205	1.70879	1.26e-09	gi|15220674|ref|NP_173734.1|/1.42275e-113/plant invertase/pectin methylesterase inhibitor superfamily protein [Arabidopsis thaliana]
AT1G62560	1.70818	4.59e-31	gi|15221491|ref|NP_176444.1|/0/flavin-containing monooxygenase FMO GS-OX3 [Arabidopsis thaliana]
AT3G56260	1.69465	5.98e-11	gi|334186016|ref|NP_001190104.1|/1.47281e-109/uncharacterized protein [Arabidopsis thaliana]
AT3G15670	1.69303	2.12e-06	gi|15232660|ref|NP_188188.1|/6.94467e-123/Late embryogenesis abundant protein (LEA) family protein [Arabidopsis thaliana]
AT2G36750	1.68202	3.65e-22	gi|15228031|ref|NP_181213.1|/0/UDP-glucosyl transferase 73C1 [Arabidopsis thaliana]
AT2G23590	1.67965	0.000247386	gi|15227861|ref|NP_179940.1|/1.05133e-156/methyl esterase 8 [Arabidopsis thaliana]
AT3G22740	1.67066	1.29e-28	gi|18403505|ref|NP_566715.1|/0/homocysteine S-methyltransferase 3 [Arabidopsis thaliana]
AT1G30320	1.66921	2.81e-160	gi|15220725|ref|NP_174322.1|/0/Remorin family protein [Arabidopsis thaliana]
AT3G01420	1.66371	0.00089856	gi|451928962|pdb|4HHR|A/0/Chain A, Crystal Structure Of Fatty Acid Alpha-dioxygenase (arabidopsis Thaliana)
AT4G22520	1.66371	0.000898789	gi|15235681|ref|NP_193983.1|/2.44855e-62/protease inhibitor/seed storage/LTP family protein [Arabidopsis thaliana]
AT4G22620	1.65656	2.6e-11	gi|116831383|gb|ABK28644.1|/6.73411e-91/unknown [Arabidopsis thaliana]
AT2G22200	1.65365	2.33e-05	gi|15227162|ref|NP_179810.1|/2.40131e-147/ethylene-responsive transcription factor ERF056 [Arabidopsis thaliana]
AT4G23600	1.6521	0	gi|15236533|ref|NP_194091.1|/0/cystine lyase CORI3 [Arabidopsis thaliana]
AT4G09500	1.64942	6.7e-08	gi|42572855|ref|NP_974524.1|/0/UDP-glycosyltransferase 79B7 [Arabidopsis thaliana]
AT5G43150	1.64635	2.18e-34	gi|15239192|ref|NP_199129.1|/1.15837e-51/uncharacterized protein [Arabidopsis thaliana]
AT4G10960	1.64321	2.74e-15	gi|15236988|ref|NP_192834.1|/0/UDP-glucose 4-epimerase 5 [Arabidopsis thaliana]
AT5G64700	1.64074	1.92e-12	gi|15238227|ref|NP_201275.1|/0/nodulin MtN21 /EamA-like transporter family protein [Arabidopsis thaliana]
AT1G09500	1.63479	7.21e-12	gi|15217530|ref|NP_172421.1|/0/alcohol dehydrogenase-like protein [Arabidopsis thaliana]
AT4G38410	1.63479	1.89e-05	gi|28372852|gb|AAO39908.1|/1.11141e-91/At4g38410 [Arabidopsis thaliana]
AT5G52300	1.63163	4.16e-06	gi|22327778|ref|NP_200043.2|/0/protein LOW-TEMPERATURE-INDUCED 65 [Arabidopsis thaliana]
AT1G71890	1.63032	0.000161587	gi|15217602|ref|NP_177334.1|/0/sucrose transport protein SUC5 [Arabidopsis thaliana]
AT1G05100	1.62894	9.26e-105	gi|15220416|ref|NP_172003.1|/0/mitogen-activated protein kinase kinase kinase 18 [Arabidopsis thaliana]
AT3G17609	1.614	5.21e-26	gi|30684595|ref|NP_850605.1|/4.86698e-79/transcription factor HY5-like protein [Arabidopsis thaliana]
AT1G56600	1.60435	5.25e-41	gi|15223567|ref|NP_176053.1|/0/galactinol synthase 2 [Arabidopsis thaliana]
AT3G57020	1.60328	1.08e-33	gi|15230200|ref|NP_191261.1|/0/calcium-dependent phosphotriesterase superfamily protein [Arabidopsis thaliana]
AT5G41900	1.59111	1.76e-13	gi|15238212|ref|NP_199005.1|/0/hydrolase, alpha/beta fold family protein [Arabidopsis thaliana]
AT5G44410	1.59015	0.000105456	gi|15241495|ref|NP_199254.1|/0/FAD-binding Berberine family protein [Arabidopsis thaliana]
AT5G52570	1.58211	3.66e-73	gi|15237204|ref|NP_200070.1|/2.98752e-174/beta-carotene hydroxylase 2 [Arabidopsis thaliana]
AT2G39330	1.57979	1.13e-43	gi|15225074|ref|NP_181465.1|/0/jacalin-related lectin 23 [Arabidopsis thaliana]
AT5G24120	1.57814	4.08e-35	gi|15237896|ref|NP_197800.1|/0/RNA polymerase sigma factor 5 [Arabidopsis thaliana]
AT1G07985	1.57273	7.31e-07	gi|42571397|ref|NP_973789.1|/3.00732e-76/uncharacterized protein [Arabidopsis thaliana]
AT3G55110	1.56506	1.39e-06	gi|15233189|ref|NP_191071.1|/0/ABC transporter G family member 18 [Arabidopsis thaliana]
AT4G00050	1.56229	2.03e-33	gi|30678541|ref|NP_191916.3|/0/transcription factor UNE10 [Arabidopsis thaliana]
AT5G28237	1.56035	8.68e-10	gi|42573495|ref|NP_974844.1|/0/tryptophan synthase beta chain-like protein [Arabidopsis thaliana]
AT1G53490	1.55987	6.33e-06	gi|145336703|ref|NP_175754.2|/2.22294e-177/RING finger-containing protein HEI10 [Arabidopsis thaliana]
AT1G16410	1.54541	3.53e-98	gi|30684842|ref|NP_563996.2|/0/dihomomethionine N-hydroxylase [Arabidopsis thaliana]
AT1G17100	1.54067	3.46e-42	gi|15220033|ref|NP_173153.1|/1.34934e-132/SOUL heme-binding protein [Arabidopsis thaliana]
AT5G65890	1.54	1.45e-19	gi|15239186|ref|NP_201390.1|/0/ACT domain repeat 1 [Arabidopsis thaliana]
AT2G01890	1.53445	8.49e-10	gi|22325419|ref|NP_178298.2|/0/purple acid phosphatase 8 [Arabidopsis thaliana]
AT2G20750	1.53302	0.000576359	gi|15225423|ref|NP_179668.1|/7.72586e-160/expansin B1 [Arabidopsis thaliana]
AT2G21640	1.53254	2.94e-14	gi|15226603|ref|NP_179758.1|/5.52746e-54/uncharacterized oxidative stress response protein [Arabidopsis thaliana]
AT4G13410	1.52543	1.36e-06	gi|172044781|sp|Q9T0L2.2|CSLAF_ARATH/0/RecName: Full=Probable mannan synthase 15; AltName: Full=Cellulose synthase-like protein A15; Short=AtCslA15 [Arabidopsis thaliana]
AT4G35190	1.52317	1.77e-08	gi|18418592|ref|NP_567978.1|/9.63968e-128/cytokinin riboside 5'-monophosphate phosphoribohydrolase LOG5 [Arabidopsis thaliana]
AT4G22505	1.51994	3.35e-234	gi|238480901|ref|NP_001154263.1|/0/Bifunctional inhibitor/lipid-transfer protein/seed storage 2S albumin superfamily protein [Arabidopsis thaliana]
AT2G31560	1.51615	2.69e-25	gi|30684991|ref|NP_850169.1|/1.08454e-118/uncharacterized protein [Arabidopsis thaliana]
AT3G04000	1.50672	7.95e-41	gi|30679011|ref|NP_566221.2|/7.55185e-147/aldehyde reductase [Arabidopsis thaliana]
AT2G39030	1.50573	1.5e-26	gi|18404927|ref|NP_565898.1|/3.53976e-130/L-ornithine N5-acetyltransferase NATA1 [Arabidopsis thaliana]
AT3G26290	1.50558	3.57e-26	gi|15231537|ref|NP_189260.1|/0/cytochrome P450 71B26 [Arabidopsis thaliana]
AT5G24420	1.50542	4.24e-56	gi|15238526|ref|NP_197830.1|/1.01841e-147/6-phosphogluconolactonase 5 [Arabidopsis thaliana]
AT1G78290	1.50355	2e-13	gi|42572159|ref|NP_974170.1|/0/serine/threonine-protein kinase SRK2C [Arabidopsis thaliana]
AT1G62710	1.49539	1.43e-36	gi|15221556|ref|NP_176458.1|/0/vacuolar-processing enzyme beta [Arabidopsis thaliana]
AT3G02020	1.49334	6.5e-38	gi|15232838|ref|NP_186851.1|/0/aspartokinase 3 [Arabidopsis thaliana]
AT3G45140	1.49052	0	gi|18407921|ref|NP_566875.1|/0/lipoxygenase 2 [Arabidopsis thaliana]
AT5G64230	1.48772	1.94e-15	gi|42568759|ref|NP_568987.2|/0/uncharacterized protein [Arabidopsis thaliana]
AT5G65870	1.48663	3.67e-29	gi|18202898|sp|Q9FEB4.1|PSK5_ARATH/6.62942e-39/RecName: Full=Phytosulfokines 5; Short=AtPSK5; Contains: RecName: Full=Phytosulfokine-alpha; Short=PSK-alpha; Short=Phytosulfokine-a; Contains: RecName: Full=Phytosulfokine-beta; Short=PSK-beta; Short=Phytosulfokine-b; Flags: Precursor [Arabidopsis thaliana]
AT5G57050	1.48599	1.55e-21	gi|15242022|ref|NP_200515.1|/0/protein phosphatase 2C 77 [Arabidopsis thaliana]
AT5G05270	1.48373	9.62e-30	gi|18414838|ref|NP_568154.1|/1.0166e-114/Chalcone-flavanone isomerase family protein [Arabidopsis thaliana]
AT5G63450	1.48308	2.46e-110	gi|15242759|ref|NP_201150.1|/0/cytochrome P450, family 94, subfamily B, polypeptide 1 [Arabidopsis thaliana]
AT1G65060	1.47962	1.35e-20	gi|15217838|ref|NP_176686.1|/0/4-coumarate--CoA ligase 3 [Arabidopsis thaliana]
AT5G02020	1.4791	2.91e-13	gi|15241665|ref|NP_195822.1|/1.72702e-84/uncharacterized protein [Arabidopsis thaliana]
AT1G08980	1.47684	7.76e-67	gi|18390964|ref|NP_563831.1|/0/amidase 1 [Arabidopsis thaliana]
AT2G37760	1.47591	6.81e-77	gi|255311878|pdb|3H7R|A/3.77296e-180/Chain A, Crystal Structure Of The Plant Stress-Response Enzyme Akr4c8
AT3G29575	1.47568	5.8e-34	gi|15230001|ref|NP_189598.1|/3.40777e-128/Ninja-family protein AFP3 [Arabidopsis thaliana]
AT1G17940	1.47472	2.07e-39	gi|145335845|ref|NP_173236.2|/0/Endosomal targeting BRO1-like domain-containing protein [Arabidopsis thaliana]
AT2G47485	1.46986	2.77e-07	gi|42571271|ref|NP_973709.1|/2.49108e-75/uncharacterized protein [Arabidopsis thaliana]
AT3G04140	1.46884	4.72e-06	gi|15229233|ref|NP_187064.1|/0/ankyrin repeat-containing protein [Arabidopsis thaliana]
AT2G32510	1.4684	3.88e-08	gi|15225692|ref|NP_180810.1|/0/mitogen-activated protein kinase kinase kinase 17 [Arabidopsis thaliana]
AT4G01895	1.45361	2.99e-06	gi|30678996|ref|NP_567218.2|/2.50007e-75/systemic acquired resistance (SAR) regulator protein NIMIN-1-like protein [Arabidopsis thaliana]
AT1G58520	1.45253	5.58e-18	gi|238478915|ref|NP_001154436.1|/0/protein RXW8 [Arabidopsis thaliana]
AT5G13330	1.45138	1.39e-07	gi|15240604|ref|NP_196837.1|/5.20722e-122/ethylene-responsive transcription factor ERF113 [Arabidopsis thaliana]
AT3G55120	1.44904	5.77e-23	gi|8670955|emb|CAB94981.1|/9.42353e-135/chalcone flavanone isomerase [Arabidopsis thaliana]
AT3G48310	1.44904	1.67e-15	gi|22331680|ref|NP_680110.1|/0/cytochrome P450 71A22 [Arabidopsis thaliana]
AT1G10370	1.44782	0	gi|240254051|ref|NP_172508.4|/8.63569e-129/glutathione S-transferase U17 [Arabidopsis thaliana]
AT2G36630	1.44531	6.09e-33	gi|30686851|ref|NP_850267.1|/0/Sulfite exporter TauE/SafE family protein [Arabidopsis thaliana]
AT3G51240	1.44153	3.6e-21	gi|15230433|ref|NP_190692.1|/0/flavanone 3-hydroxylase [Arabidopsis thaliana]
AT1G52342	1.43864	2.05e-11	gi|116830075|gb|ABK27995.1|/8.38134e-47/unknown [Arabidopsis thaliana]
AT4G15430	1.43815	6.23e-07	gi|145340252|ref|NP_193278.4|/0/ERD (early-responsive to dehydration stress) family protein [Arabidopsis thaliana]
AT5G63090	1.43815	0.000821074	gi|15242624|ref|NP_201114.1|/1.20167e-107/protein LATERAL ORGAN BOUNDARIES [Arabidopsis thaliana]
AT2G37180	1.43363	3.55e-98	gi|15228096|ref|NP_181255.1|/8.65322e-165/aquaporin PIP2-3 [Arabidopsis thaliana]
AT3G56290	1.43144	1.52e-41	gi|15228878|ref|NP_191188.1|/5.19395e-96/uncharacterized protein [Arabidopsis thaliana]
AT4G33666	1.42452	2.93e-13	gi|18418266|ref|NP_567933.1|/3.27058e-38/uncharacterized protein [Arabidopsis thaliana]
AT3G48510	1.4237	2.49e-05	gi|18408645|ref|NP_566907.1|/2.03213e-172/uncharacterized protein [Arabidopsis thaliana]
AT4G26080	1.42331	2.21e-70	gi|15236110|ref|NP_194338.1|/0/protein phosphatase 2C 56 [Arabidopsis thaliana]
AT3G47500	1.4223	7.04e-30	gi|15232818|ref|NP_190334.1|/0/cyclic DOF factor 3 [Arabidopsis thaliana]
AT1G51140	1.42081	2.59e-24	gi|18403381|ref|NP_564583.1|/0/transcription factor bHLH122 [Arabidopsis thaliana]
AT5G56840	1.41661	1.98e-05	gi|15241963|ref|NP_200495.1|/7.22046e-134/myb-like transcription factor family protein [Arabidopsis thaliana]
AT1G19490	1.40835	0.000138019	gi|15223566|ref|NP_173381.1|/0/basic-leucine zipper transcription factor family protein [Arabidopsis thaliana]
AT3G12320	1.39934	1.49e-28	gi|18399568|ref|NP_566419.1|/6.24805e-154/uncharacterized protein [Arabidopsis thaliana]
AT5G67620	1.39934	3.3e-06	gi|15240787|ref|NP_201563.1|/1.72052e-103/uncharacterized protein [Arabidopsis thaliana]
AT5G08640	1.39758	1.82e-17	gi|15242339|ref|NP_196481.1|/0/flavonol synthase 1 [Arabidopsis thaliana]
AT3G59710	1.39586	0.000959935	gi|15231739|ref|NP_191530.1|/9.88913e-170/Rossmann-fold NAD(P)-binding domain-containing protein [Arabidopsis thaliana]
AT1G70850	1.39261	3.94e-51	gi|30698757|ref|NP_850976.1|/0/MLP-like protein 34 [Arabidopsis thaliana]
AT3G25770	1.3899	0	gi|18404656|ref|NP_566776.1|/3.77763e-142/allene oxide cyclase 2 [Arabidopsis thaliana]
AT3G53420	1.38954	0	gi|15231810|ref|NP_190910.1|/3.93311e-165/aquaporin PIP2-1 [Arabidopsis thaliana]
AT3G55130	1.38917	1.91e-36	gi|15233191|ref|NP_191073.1|/0/ABC transporter G family member 19 [Arabidopsis thaliana]
AT5G47610	1.38687	0.000762718	gi|15238143|ref|NP_199572.1|/1.07078e-92/RING-H2 finger protein ATL79 [Arabidopsis thaliana]
AT4G31870	1.38687	3.14e-11	gi|22329066|ref|NP_194915.2|/8.82641e-132/glutathione peroxidase 7 [Arabidopsis thaliana]
AT2G42540	1.38531	0	gi|15227963|ref|NP_181782.1|/1.09087e-70/cold-regulated protein 15a [Arabidopsis thaliana]
AT3G27250	1.37865	0.0006035	gi|15232126|ref|NP_189361.1|/8.48995e-165/uncharacterized protein [Arabidopsis thaliana]
AT5G62130	1.37007	0.000127757	gi|334188564|ref|NP_001190592.1|/0/Per1-like family protein [Arabidopsis thaliana]
AT4G22530	1.36865	3.34e-37	gi|15235684|ref|NP_193984.1|/3.57997e-151/S-adenosyl-L-methionine-dependent methyltransferase domain-containing protein [Arabidopsis thaliana]
AT3G48460	1.36137	1.55e-42	gi|15228381|ref|NP_190416.1|/0/GDSL esterase/lipase [Arabidopsis thaliana]
AT3G19710	1.35915	8.6e-178	gi|15230923|ref|NP_188605.1|/0/branched-chain aminotransferase4 [Arabidopsis thaliana]
AT1G26560	1.35686	1.21e-73	gi|15222734|ref|NP_173978.1|/0/beta glucosidase 40 [Arabidopsis thaliana]
AT5G54300	1.35394	4.47e-66	gi|15239605|ref|NP_200241.1|/0/uncharacterized protein [Arabidopsis thaliana]
AT5G39050	1.34969	0	gi|240256381|ref|NP_568561.4|/0/phenolic glucoside malonyltransferase 1 [Arabidopsis thaliana]
AT3G47295	1.34467	3.05e-33	gi|18408397|ref|NP_566890.1|/1.07323e-33/uncharacterized protein [Arabidopsis thaliana]
AT2G47780	1.33861	6.51e-06	gi|15227131|ref|NP_182299.1|/3.41501e-131/Rubber elongation factor protein [Arabidopsis thaliana]
AT1G33110	1.3374	7.39e-52	gi|15223402|ref|NP_174587.1|/0/MATE efflux family protein [Arabidopsis thaliana]
AT4G05100	1.33619	1.38e-57	gi|15234593|ref|NP_192419.1|/0/myb domain protein 74 [Arabidopsis thaliana]
AT1G07010	1.33231	2.1e-31	gi|238478384|ref|NP_001154316.1|/0/shewenella-like protein phosphatase 1 [Arabidopsis thaliana]
AT4G22513	1.33173	4.08e-06	gi|145333758|ref|NP_001078428.1|/1.95962e-59/protease inhibitor/seed storage/LTP family protein [Arabidopsis thaliana]
AT3G55500	1.33173	9.41e-40	gi|15233283|ref|NP_191109.1|/2.37813e-155/expansin A16 [Arabidopsis thaliana]
AT2G38870	1.33142	3.79e-59	gi|18404883|ref|NP_030435.1|/1.66061e-34/PR-6 proteinase inhibitor family protein [Arabidopsis thaliana]
AT5G17220	1.33	5.27e-11	gi|15237931|ref|NP_197224.1|/1.00386e-120/glutathione S-transferase phi 12 [Arabidopsis thaliana]
AT3G21870	1.32808	1.53e-05	gi|15233185|ref|NP_188825.1|/2.07193e-115/cyclin p2;1 [Arabidopsis thaliana]
AT5G13370	1.32437	2.32e-39	gi|30684377|ref|NP_196841.2|/0/auxin-responsive GH3 family protein [Arabidopsis thaliana]
AT1G10960	1.32347	9.32e-293	gi|15220256|ref|NP_172565.1|/7.05391e-78/ferredoxin 1 [Arabidopsis thaliana]
AT5G10300	1.32312	1.6e-58	gi|15238118|ref|NP_196592.1|/2.14821e-148/methyl esterase 5 [Arabidopsis thaliana]
AT2G03760	1.32148	2.19e-47	gi|15227699|ref|NP_178471.1|/0/sulphotransferase 12 [Arabidopsis thaliana]
AT4G21910	1.31909	1.32e-49	gi|334186796|ref|NP_001190793.1|/0/MATE efflux family protein [Arabidopsis thaliana]
AT1G32900	1.3179	2.52e-127	gi|15223331|ref|NP_174566.1|/0/granule-bound starch synthase 1 [Arabidopsis thaliana]
AT1G78170	1.3176	7.84e-12	gi|30699311|ref|NP_177941.2|/4.09541e-128/uncharacterized protein [Arabidopsis thaliana]
AT3G51895	1.31464	2.81e-60	gi|186510950|ref|NP_190758.2|/0/sulfate transporter 3;1 [Arabidopsis thaliana]
AT3G28007	1.31452	8.87e-10	gi|18405611|ref|NP_566829.1|/2.25628e-139/bidirectional sugar transporter SWEET4 [Arabidopsis thaliana]
AT4G33930	1.31262	1.13e-10	gi|15235180|ref|NP_195119.1|/0/glycine-rich protein [Arabidopsis thaliana]
AT1G72120	1.3097	4.83e-14	gi|332278142|sp|Q8VZE2.2|PTR22_ARATH/0/RecName: Full=Protein NRT1/ PTR FAMILY 5.14; Short=AtNPF5.14; AltName: Full=Nitrate transporter 1.15
AT5G24570	1.30873	7.27e-31	gi|18420809|ref|NP_568448.1|/9.11208e-33/uncharacterized protein [Arabidopsis thaliana]
AT2G36790	1.30865	1.74e-28	gi|15228035|ref|NP_181217.1|/0/UDP-glucosyl transferase 73C6 [Arabidopsis thaliana]
AT3G54820	1.30723	2.63e-18	gi|32363433|sp|Q9SV31.1|PIP25_ARATH/1.4853e-164/RecName: Full=Probable aquaporin PIP2-5; AltName: Full=Plasma membrane intrinsic protein 2-5; Short=AtPIP2;5; AltName: Full=Plasma membrane intrinsic protein 2d; Short=PIP2d; Contains: RecName: Full=Probable aquaporin PIP2-5, N-terminally processed [Arabidopsis thaliana]
AT5G19850	1.3067	3.83e-15	gi|18420047|ref|NP_568381.1|/0/hydrolase, alpha/beta fold family protein [Arabidopsis thaliana]
AT4G30140	1.30538	1.57e-27	gi|15234641|ref|NP_194743.1|/0/GDSL esterase/lipase [Arabidopsis thaliana]
AT1G62570	1.30228	6.97e-71	gi|18407612|ref|NP_564797.1|/0/flavin-containing monooxygenase FMO GS-OX4 [Arabidopsis thaliana]
AT2G30230	1.30228	1.8e-06	gi|15227725|ref|NP_180582.1|/1.06247e-99/uncharacterized protein [Arabidopsis thaliana]
AT1G20070	1.30114	1.09e-05	gi|15223762|ref|NP_173435.1|/1.46951e-106/uncharacterized protein [Arabidopsis thaliana]
AT3G57010	1.29576	8.78e-07	gi|15230182|ref|NP_191260.1|/0/calcium-dependent phosphotriesterase superfamily protein [Arabidopsis thaliana]
AT5G04950	1.29427	1.15e-24	gi|15238376|ref|NP_196114.1|/0/nicotianamine synthase 1 [Arabidopsis thaliana]
AT5G42800	1.29359	3.98e-75	gi|15239063|ref|NP_199094.1|/0/dihydroflavonol-4-reductase [Arabidopsis thaliana]
AT2G16890	1.29075	4.39e-29	gi|30679796|ref|NP_179281.3|/0/UDP-glycosyltransferase 90A1 [Arabidopsis thaliana]
AT2G41290	1.28733	0.000193213	gi|15227323|ref|NP_181661.1|/0/strictosidine synthase-like 2 [Arabidopsis thaliana]
AT5G15950	1.28572	3.5e-11	gi|15237226|ref|NP_197099.1|/0/S-adenosylmethionine decarboxylase proenzyme 2 [Arabidopsis thaliana]
AT4G26850	1.28364	1.08e-49	gi|18416877|ref|NP_567759.1|/0/GDP-L-galactose phosphorylase 1 [Arabidopsis thaliana]
AT5G06570	1.28323	2.19e-14	gi|15240090|ref|NP_196275.1|/0/probable carboxylesterase 15 [Arabidopsis thaliana]
AT1G56580	1.28063	1.31e-211	gi|18405887|ref|NP_564720.1|/2.08976e-88/protein SMALLER WITH VARIABLE BRANCHES [Arabidopsis thaliana]
AT4G29700	1.27222	4.64e-16	gi|15233665|ref|NP_194699.1|/0/alkaline-phosphatase-like protein [Arabidopsis thaliana]
AT3G25760	1.27043	0	gi|15230874|ref|NP_189204.1|/9.06108e-144/allene oxide cyclase 1 [Arabidopsis thaliana]
AT1G10640	1.26822	8.59e-17	gi|240254055|ref|NP_563875.6|/0/pectin lyase-like protein [Arabidopsis thaliana]
AT5G59540	1.26532	1.8e-177	gi|15238459|ref|NP_200762.1|/0/oxidoreductase, 2OG-Fe(II) oxygenase family protein [Arabidopsis thaliana]
AT1G01030	1.26293	2.01e-15	gi|15223284|ref|NP_171611.1|/0/B3 domain-containing transcription factor NGA3 [Arabidopsis thaliana]
AT5G43630	1.26089	1.73e-09	gi|15239925|ref|NP_199176.1|/0/zinc knuckle (CCHC-type) family protein [Arabidopsis thaliana]
AT4G39940	1.2571	3.06e-66	gi|15236087|ref|NP_195704.1|/1.35497e-168/adenosine-5'-phosphosulfate-kinase 2 [Arabidopsis thaliana]
AT1G61120	1.25452	1.65e-39	gi|18407028|ref|NP_564772.1|/0/terpene synthase 04 [Arabidopsis thaliana]
AT1G69260	1.24979	1.62e-45	gi|18409228|ref|NP_564956.1|/0/ABI five binding protein [Arabidopsis thaliana]
AT3G55290	1.24972	1.29e-06	gi|18410245|ref|NP_567019.1|/5.50167e-156/Rossmann-fold NAD(P)-binding domain-containing protein [Arabidopsis thaliana]
AT1G70260	1.24867	3.27e-05	gi|42563104|ref|NP_177183.2|/0/nodulin MtN21-like transporter UMAMIT36 [Arabidopsis thaliana]
AT1G79270	1.24502	6.65e-69	gi|18412316|ref|NP_565205.1|/0/uncharacterized protein [Arabidopsis thaliana]
AT1G15380	1.24313	0.000505744	gi|18394235|ref|NP_563973.1|/1.34483e-99/Lactoylglutathione lyase / glyoxalase I family protein [Arabidopsis thaliana]
AT1G07590	1.24258	9.89e-06	gi|15222438|ref|NP_172238.1|/0/pentatricopeptide repeat-containing protein [Arabidopsis thaliana]
AT5G25610	1.24198	1.67e-202	gi|15239478|ref|NP_197943.1|/0/dehydration-responsive protein RD22 [Arabidopsis thaliana]
AT2G35700	1.24153	0.000398304	gi|15227471|ref|NP_181113.1|/3.20686e-109/ethylene-responsive transcription factor ERF038 [Arabidopsis thaliana]
AT2G39980	1.23933	4.03e-64	gi|116830503|gb|ABK28209.1|/0/unknown [Arabidopsis thaliana]
AT5G49740	1.23411	8.56e-13	gi|30695741|ref|NP_199785.2|/0/ferric reduction oxidase 7 [Arabidopsis thaliana]
AT1G32940	1.23322	3.35e-17	gi|18398655|ref|NP_564412.1|/0/Subtilase 3.5 [Arabidopsis thaliana]
AT4G22485	1.23279	4.51e-93	gi|186512422|ref|NP_001078427.2|/0/protease inhibitor/seed storage/LTP family protein [Arabidopsis thaliana]
AT3G24420	1.23083	7.9e-25	gi|15230110|ref|NP_189085.1|/5.08814e-151/hydrolase, alpha/beta fold family protein [Arabidopsis thaliana]
AT4G01870	1.22874	0	gi|15234357|ref|NP_192096.1|/0/tolB-related protein [Arabidopsis thaliana]
AT4G08870	1.22836	1.31e-99	gi|15236635|ref|NP_192626.1|/0/arginine amidohydrolase 2 [Arabidopsis thaliana]
AT1G02205	1.22628	1.3e-80	gi|334182234|ref|NP_001184890.1|/0/protein ECERIFERUM 1 [Arabidopsis thaliana]
AT3G15354	1.2257	3.11e-08	gi|22331100|ref|NP_683567.1|/0/protein SPA1-related 3 [Arabidopsis thaliana]
AT3G23810	1.22248	4.62e-221	gi|15229522|ref|NP_189023.1|/0/adenosylhomocysteinase 2 [Arabidopsis thaliana]
AT1G07720	1.22224	2.41e-40	gi|15222994|ref|NP_172251.1|/0/3-ketoacyl-CoA synthase 3 [Arabidopsis thaliana]
AT4G39330	1.22075	1.84e-51	gi|148887169|sp|P42734.2|CADH9_ARATH/0/RecName: Full=Probable cinnamyl alcohol dehydrogenase 9; Short=AtCAD9 [Arabidopsis thaliana]
AT5G48880	1.21839	2.67e-33	gi|30695564|ref|NP_568704.2|/0/3-keto-acyl-CoA thiolase 2 [Arabidopsis thaliana]
AT4G37760	1.21651	2.77e-64	gi|18420113|ref|NP_568033.1|/0/squalene epoxidase 3 [Arabidopsis thaliana]
AT5G17050	1.20999	1.73e-10	gi|15237899|ref|NP_197207.1|/0/anthocyanidin 3-O-glucosyltransferase [Arabidopsis thaliana]
AT3G61220	1.20844	1.81e-22	gi|334186180|ref|NP_001190151.1|/8.99517e-171/(+)-neomenthol dehydrogenase [Arabidopsis thaliana]
AT2G04050	1.2083	3.79e-06	gi|15228073|ref|NP_178492.1|/0/MATE efflux family protein [Arabidopsis thaliana]
AT1G65860	1.2083	1.12e-22	gi|15218834|ref|NP_176761.1|/0/flavin-containing monooxygenase FMO GS-OX1 [Arabidopsis thaliana]
AT5G53970	1.20594	2.04e-20	gi|15239521|ref|NP_200208.1|/0/tyrosine aminotransferase [Arabidopsis thaliana]
AT4G10120	1.20277	1.05e-54	gi|42566384|ref|NP_192750.2|/0/probable sucrose-phosphate synthase 4 [Arabidopsis thaliana]
AT2G37040	1.19501	4.36e-193	gi|15228074|ref|NP_181241.1|/0/phenylalanine ammonia-lyase 1 [Arabidopsis thaliana]
AT5G19730	1.19422	1.92e-09	gi|15241163|ref|NP_197474.1|/0/probable pectinesterase 53 [Arabidopsis thaliana]
AT1G69790	1.19422	0.000802508	gi|52627095|gb|AAU84674.1|/0/At1g69790 [Arabidopsis thaliana]
AT3G01060	1.19422	4.38e-50	gi|18395692|ref|NP_566129.1|/0/uncharacterized protein [Arabidopsis thaliana]
AT1G43160	1.18598	1.2e-100	gi|15218275|ref|NP_175008.1|/2.1608e-110/ethylene-responsive transcription factor RAP2-6 [Arabidopsis thaliana]
AT3G09270	1.18494	1.16e-08	gi|15232628|ref|NP_187538.1|/2.44012e-128/glutathione S-transferase TAU 8 [Arabidopsis thaliana]
AT2G36080	1.18403	6.21e-08	gi|30686669|ref|NP_850260.1|/6.84225e-146/B3 DNA-binding domain transcription factor [Arabidopsis thaliana]
AT5G41050	1.18325	2.07e-07	gi|18422055|ref|NP_568588.1|/3.09377e-93/pollen Ole e 1 allergen and extensin family protein [Arabidopsis thaliana]
AT5G19440	1.18016	5.38e-244	gi|15239741|ref|NP_197445.1|/0/alcohol dehydrogenase-like protein [Arabidopsis thaliana]
AT1G22500	1.17652	8.3e-05	gi|68565333|sp|Q9SK92.1|ATL15_ARATH/0/RecName: Full=E3 ubiquitin-protein ligase ATL15; AltName: Full=RING-H2 finger protein ATL15; Flags: Precursor [Arabidopsis thaliana]
AT2G43520	1.17561	0.000133087	gi|15224297|ref|NP_181880.1|/2.67874e-48/trypsin inhibitor protein 2 [Arabidopsis thaliana]
AT2G39350	1.16075	9.97e-33	gi|15225076|ref|NP_181467.1|/0/ABC transporter G family member 1 [Arabidopsis thaliana]
AT1G79520	1.15946	6.81e-11	gi|334184018|ref|NP_001185437.1|/0/cation efflux family protein [Arabidopsis thaliana]
AT3G03990	1.15922	6.63e-60	gi|75337534|sp|Q9SQR3.1|D14_ARATH/2.86202e-151/RecName: Full=Probable strigolactone esterase D14 homolog; AltName: Full=Protein DWARF-14; Short=AtD14 [Arabidopsis thaliana]
AT3G28600	1.15908	6.67e-19	gi|79423995|ref|NP_189501.2|/0/AAA-type ATPase family protein [Arabidopsis thaliana]
AT1G54100	1.15669	8.3e-235	gi|15221042|ref|NP_175812.1|/0/aldehyde dehydrogenase 7B4 [Arabidopsis thaliana]
AT5G60890	1.15575	6.47e-21	gi|15239466|ref|NP_200897.1|/2.26016e-171/myb domain protein 34 [Arabidopsis thaliana]
AT2G41250	1.1524	4.07e-14	gi|15227309|ref|NP_181658.1|/9.5359e-167/haloacid dehalogenase-like hydrolase domain-containing protein [Arabidopsis thaliana]
AT1G28600	1.1472	8.25e-41	gi|15218731|ref|NP_174182.1|/0/GDSL esterase/lipase [Arabidopsis thaliana]
AT3G04010	1.14574	6.27e-67	gi|42563478|ref|NP_187051.3|/0/O-glycosyl hydrolases family 17 protein [Arabidopsis thaliana]
AT5G62430	1.14308	1.26e-19	gi|145359559|ref|NP_201049.3|/6.24976e-177/cycling DOF factor 1 [Arabidopsis thaliana]
AT3G49620	1.14251	2.46e-07	gi|22331716|ref|NP_190531.2|/0/2-oxoacid-dependent dioxygenase-like protein DIN11 [Arabidopsis thaliana]
AT3G50970	1.13833	0	gi|15230361|ref|NP_190666.1|/1.32604e-115/dehydrin Xero 2 [Arabidopsis thaliana]
AT5G07460	1.13746	6.48e-31	gi|15240795|ref|NP_196363.1|/3.36192e-127/peptide methionine sulfoxide reductase A2 [Arabidopsis thaliana]
AT2G46790	1.13612	0.000331993	gi|18407171|ref|NP_566085.1|/0/two-component response regulator-like APRR9 [Arabidopsis thaliana]
AT4G09820	1.13612	0.000331901	gi|79466906|ref|NP_192720.2|/0/transcription factor TT8 [Arabidopsis thaliana]
AT4G12320	1.13498	1.04e-08	gi|240255793|ref|NP_192969.4|/0/cytochrome P450, family 706, subfamily A, polypeptide 6 [Arabidopsis thaliana]
AT1G10585	1.13474	1.7e-119	gi|79340924|ref|NP_563873.2|/5.83301e-96/basic helix-loop-helix domain-containing protein [Arabidopsis thaliana]
AT2G34720	1.13282	3.68e-16	gi|30686189|ref|NP_850235.1|/2.4596e-112/nuclear transcription factor Y subunit A-4 [Arabidopsis thaliana]
AT1G80760	1.12711	1.15e-08	gi|15220826|ref|NP_178191.1|/3.69326e-172/aquaporin NIP6-1 [Arabidopsis thaliana]
AT4G34230	1.12706	1.21e-124	gi|15235295|ref|NP_195149.1|/0/cinnamyl alcohol dehydrogenase 5 [Arabidopsis thaliana]
AT1G59700	1.12583	2.19e-15	gi|15218872|ref|NP_176178.1|/2.86517e-130/glutathione S-transferase TAU 16 [Arabidopsis thaliana]
AT4G27030	1.1252	6.08e-27	gi|15236949|ref|NP_194433.1|/0/palmitate desaturase [Arabidopsis thaliana]
AT3G03780	1.12411	3.16e-187	gi|15228634|ref|NP_187028.1|/0/methionine synthase 2 [Arabidopsis thaliana]
AT3G61890	1.12327	6.36e-30	gi|15228625|ref|NP_191748.1|/7.10424e-137/homeobox-leucine zipper protein ATHB-12 [Arabidopsis thaliana]
AT1G16400	1.12314	4.8e-10	gi|30684835|ref|NP_563995.2|/0/Hexahomomethionine N-hydroxylase [Arabidopsis thaliana]
AT3G16330	1.12224	2.61e-31	gi|15228179|ref|NP_188254.1|/1.52008e-115/uncharacterized protein [Arabidopsis thaliana]
AT5G53760	1.11937	1.23e-24	gi|15238833|ref|NP_200187.1|/0/MLO-like protein 11 [Arabidopsis thaliana]
AT1G77450	1.11779	2.43e-152	gi|15223963|ref|NP_177869.1|/2.20952e-150/NAC domain containing protein 32 [Arabidopsis thaliana]
AT1G09530	1.11705	5.32e-35	gi|15217533|ref|NP_172424.1|/0/transcription factor PIF3 [Arabidopsis thaliana]
AT4G01070	1.11447	2.2e-84	gi|15234056|ref|NP_192016.1|/0/UDP-glycosyltransferase 72B1 [Arabidopsis thaliana]
AT5G61820	1.1083	6.65e-235	gi|22328003|ref|NP_200990.2|/0/uncharacterized protein [Arabidopsis thaliana]
AT5G40390	1.10605	9.91e-23	gi|75171832|sp|Q9FND9.1|RFS5_ARATH/0/RecName: Full=Probable galactinol--sucrose galactosyltransferase 5; AltName: Full=Protein SEED IMBIBITION 1-LIKE; AltName: Full=Raffinose synthase 5 [Arabidopsis thaliana]
AT5G66400	1.10443	6.11e-31	gi|15239373|ref|NP_201441.1|/3.99105e-111/dehydrin Rab18 [Arabidopsis thaliana]
AT5G02830	1.10371	4.56e-07	gi|30679784|ref|NP_195903.2|/0/pentatricopeptide repeat-containing protein [Arabidopsis thaliana]
AT3G05180	1.10346	9.38e-08	gi|15229919|ref|NP_187169.1|/0/GDSL esterase/lipase [Arabidopsis thaliana]
AT1G10060	1.1028	1.88e-15	gi|30681524|ref|NP_849629.1|/0/branched-chain-amino-acid aminotransferase 1 [Arabidopsis thaliana]
AT5G55120	1.10134	1.03e-36	gi|15240467|ref|NP_200323.1|/0/GDP-L-galactose phosphorylase [Arabidopsis thaliana]
AT3G21760	1.09784	3.08e-13	gi|15233151|ref|NP_188813.1|/0/UDP-glycosyltransferase HYR1 [Arabidopsis thaliana]
AT5G13930	1.09532	1.86e-77	gi|15240753|ref|NP_196897.1|/0/chalcone synthase [Arabidopsis thaliana]
AT4G16760	1.09524	0	gi|240255949|ref|NP_567513.4|/0/peroxisomal acyl-coenzyme A oxidase 1 [Arabidopsis thaliana]
AT3G13040	1.0941	2.1e-53	gi|15795136|dbj|BAB02514.1|/0/transfactor-like protein [Arabidopsis thaliana]
AT1G14250	1.09409	3.91e-59	gi|15221007|ref|NP_172877.1|/0/probable apyrase 5 [Arabidopsis thaliana]
AT1G08830	1.09249	1.47e-20	gi|15223944|ref|NP_172360.1|/5.65439e-86/superoxide dismutase [Cu-Zn] [Arabidopsis thaliana]
AT5G39580	1.09212	2.87e-14	gi|15241812|ref|NP_198774.1|/0/peroxidase 62 [Arabidopsis thaliana]
AT5G58770	1.08851	2.3e-08	gi|15237748|ref|NP_200685.1|/3.88318e-177/dehydrodolichyl diphosphate synthase 2 [Arabidopsis thaliana]
AT4G14060	1.08835	1.56e-09	gi|15236401|ref|NP_193142.1|/4.21241e-86/major latex protein-like protein [Arabidopsis thaliana]
AT5G01260	1.08823	1.05e-10	gi|42573247|ref|NP_974720.1|/0/carbohydrate-binding domain-containing protein [Arabidopsis thaliana]
AT3G19270	1.08377	1.63e-21	gi|18402179|ref|NP_566628.1|/0/abscisic acid 8'-hydroxylase 4 [Arabidopsis thaliana]
AT2G47800	1.08363	2.4e-33	gi|15227133|ref|NP_182301.1|/0/ABC transporter C family member 4 [Arabidopsis thaliana]
AT3G03190	1.0828	8.77e-07	gi|15228488|ref|NP_186969.1|/1.71233e-120/glutathione S-transferase F11 [Arabidopsis thaliana]
AT4G00430	1.08275	0	gi|18411332|ref|NP_567178.1|/7.92495e-166/plasma membrane intrinsic protein 1;4 [Arabidopsis thaliana]
AT1G72030	1.08035	7.14e-10	gi|15218309|ref|NP_177348.1|/9.20048e-144/Acyl-CoA N-acyltransferases-like protein [Arabidopsis thaliana]
AT4G35160	1.07583	4.08e-14	gi|15236282|ref|NP_195242.1|/0/O-methyltransferase family protein [Arabidopsis thaliana]
AT4G22920	1.07481	2.36e-09	gi|18416035|ref|NP_567673.1|/3.51506e-157/protein NON-YELLOWING 1 [Arabidopsis thaliana]
AT1G62540	1.07438	7.23e-12	gi|18407608|ref|NP_564796.1|/0/flavin-containing monooxygenase FMO GS-OX2 [Arabidopsis thaliana]
AT1G05560	1.07411	2.78e-97	gi|18390540|ref|NP_563742.1|/0/UDP-glucosyltransferase 75B1 [Arabidopsis thaliana]
AT2G37170	1.06929	4.07e-36	gi|15228095|ref|NP_181254.1|/1.47602e-164/aquaporin PIP2-2 [Arabidopsis thaliana]
AT5G59510	1.06869	5.88e-06	gi|30697242|ref|NP_200759.2|/1.10431e-78/protein rotundifolia like 5 [Arabidopsis thaliana]
AT3G21230	1.06827	1.21e-25	gi|42565074|ref|NP_188760.3|/0/4-coumarate--CoA ligase 5 [Arabidopsis thaliana]
AT5G01870	1.06647	2.24e-05	gi|15241086|ref|NP_195807.1|/4.2046e-62/pathogenesis-related lipid transfer protein [Arabidopsis thaliana]
AT1G35560	1.0659	0.000199912	gi|15219640|ref|NP_174789.1|/0/transcription factor TCP23 [Arabidopsis thaliana]
AT1G45191	1.05759	3.55e-20	gi|334183092|ref|NP_849771.2|/0/beta-glucosidase 1 [Arabidopsis thaliana]
AT2G39250	1.05506	2e-07	gi|79594951|ref|NP_850313.2|/0/AP2-like ethylene-responsive transcription factor SNZ [Arabidopsis thaliana]
AT5G64250	1.05451	4.31e-95	gi|30697982|ref|NP_568988.2|/0/Aldolase-type TIM barrel family protein [Arabidopsis thaliana]
AT2G41380	1.04774	9.3e-12	gi|15227331|ref|NP_181669.1|/2.37426e-153/S-adenosyl-L-methionine-dependent methyltransferase-like protein [Arabidopsis thaliana]
AT5G15970	1.0466	9.76e-282	gi|15237236|ref|NP_197101.1|/1.05474e-28/stress-induced protein KIN2 [Arabidopsis thaliana]
AT2G17300	1.04638	1.55e-06	gi|15227807|ref|NP_179322.1|/2.12404e-74/uncharacterized protein [Arabidopsis thaliana]
AT2G22330	1.04605	2.41e-58	gi|42569237|ref|NP_179820.2|/0/tryptophan N-monooxygenase 2 [Arabidopsis thaliana]
AT5G37260	1.04536	0.000146603	gi|15240172|ref|NP_198542.1|/1.54665e-161/MYB family transcription factor Circadian 1 [Arabidopsis thaliana]
AT3G28070	1.04222	4.2e-10	gi|22331380|ref|NP_189446.2|/0/nodulin MtN21 /EamA-like transporter family protein [Arabidopsis thaliana]
AT2G43820	1.04151	4.9e-86	gi|15224368|ref|NP_181910.1|/0/UDP-glucosyltransferase 74F2 [Arabidopsis thaliana]
AT2G16630	1.04069	1.81e-32	gi|22325715|ref|NP_179254.2|/0/pollen Ole e 1 allergen and extensin family protein [Arabidopsis thaliana]
AT5G52400	1.03857	0.000552552	gi|22327780|ref|NP_200053.2|/0/cytochrome P450, family 715, subfamily A, polypeptide 1 [Arabidopsis thaliana]
AT4G04020	1.0385	1.89e-291	gi|15233357|ref|NP_192311.1|/7.64351e-176/fibrillin [Arabidopsis thaliana]
AT4G22470	1.03773	2.52e-46	gi|42567033|ref|NP_193978.2|/0/protease inhibitor/seed storage/lipid transfer protein (LTP) family protein [Arabidopsis thaliana]
AT4G39800	1.03732	2.75e-141	gi|15236025|ref|NP_195690.1|/0/myo-inositol-1-phosphate synthase 1 [Arabidopsis thaliana]
AT3G54600	1.03689	5.17e-30	gi|15232554|ref|NP_191023.1|/0/class I glutamine amidotransferase-like domain-containing protein [Arabidopsis thaliana]
AT4G24960	1.03593	0	gi|18416458|ref|NP_567713.1|/1.49201e-75/HVA22-like protein d [Arabidopsis thaliana]
AT2G34070	1.03407	5.67e-61	gi|18403435|ref|NP_565779.1|/0/trichome birefringence-like 37 protein [Arabidopsis thaliana]
AT4G35090	1.03323	0	gi|15236264|ref|NP_195235.1|/0/catalase 2 [Arabidopsis thaliana]
AT1G18590	1.02728	1.08e-11	gi|15221820|ref|NP_173294.1|/0/sulfotransferase 17 [Arabidopsis thaliana]
AT4G31910	1.02693	1.17e-10	gi|15236579|ref|NP_194919.1|/0/BR-related acyltransferase 1 [Arabidopsis thaliana]
AT3G06490	1.0261	6.08e-08	gi|75334847|sp|Q9LDE1.1|MY108_ARATH/0/RecName: Full=Transcription factor MYB108; AltName: Full=Myb-related protein 108; Short=AtMYB108; AltName: Full=Protein BOTRYTIS-SUSCEPTIBLE 1 [Arabidopsis thaliana]
AT2G19650	1.02516	3.23e-08	gi|15224819|ref|NP_179555.1|/0/cysteine/histidine-rich C1 domain-containing protein [Arabidopsis thaliana]
AT1G70580	1.02473	2.28e-46	gi|15223186|ref|NP_177215.1|/0/glutamate--glyoxylate aminotransferase 2 [Arabidopsis thaliana]
AT5G18670	1.0243	7.64e-27	gi|75331155|sp|Q8VYW2.1|BAM9_ARATH/0/RecName: Full=Inactive beta-amylase 9; AltName: Full=1,4-alpha-D-glucan maltohydrolase; AltName: Full=Inactive beta-amylase 3 [Arabidopsis thaliana]
AT3G21750	1.02334	2.8e-14	gi|15233149|ref|NP_188812.1|/0/UDP-glucosyl transferase 71B1 [Arabidopsis thaliana]
AT2G02990	1.02301	3.97e-31	gi|15227068|ref|NP_178399.1|/1.78608e-137/ribonuclease 1 [Arabidopsis thaliana]
AT5G15960	1.02162	2.81e-64	gi|15237228|ref|NP_197100.1|/2.77564e-29/cold and ABA inducible protein kin1 [Arabidopsis thaliana]
AT2G41190	1.02089	0.000170466	gi|18405629|ref|NP_030664.1|/0/transmembrane amino acid transporter family protein [Arabidopsis thaliana]
AT5G07990	1.02019	5.53e-07	gi|15241483|ref|NP_196416.1|/0/Flavonoid 3'-monooxygenase [Arabidopsis thaliana]
AT2G28780	1.01983	6.57e-08	gi|30684006|ref|NP_180444.2|/0/uncharacterized protein [Arabidopsis thaliana]
AT5G01820	1.01812	3.56e-12	gi|15241067|ref|NP_195802.1|/0/CBL-interacting serine/threonine-protein kinase 14 [Arabidopsis thaliana]
AT5G56795	1.01727	1.49e-61	gi|145323668|ref|NP_001032085.2|/1.53158e-19/metallothionein 1B [Arabidopsis thaliana]
AT1G32240	1.01525	6.18e-05	gi|18398337|ref|NP_564392.1|/0/probable transcription factor KAN2 [Arabidopsis thaliana]
AT1G68570	1.01467	4.71e-24	gi|75266596|sp|Q9SX20.1|PTR18_ARATH/0/RecName: Full=Protein NRT1/ PTR FAMILY 3.1; Short=AtNPF3.1 [Arabidopsis thaliana]
AT5G07690	1.01238	5.01e-06	gi|15240838|ref|NP_196386.1|/0/myb domain protein 29 [Arabidopsis thaliana]
AT1G73480	1.00542	6.81e-147	gi|18410366|ref|NP_565066.1|/0/alpha/beta-Hydrolases superfamily protein [Arabidopsis thaliana]
AT1G18710	1.00158	2.93e-15	gi|15221853|ref|NP_173306.1|/3.26699e-155/myb domain protein 47 [Arabidopsis thaliana]
AT1G20160	1.00158	1.54e-07	gi|18394832|ref|NP_564107.1|/0/serine-type endopeptidase SBT5.2 [Arabidopsis thaliana]
AT5G01200	1.00158	0.000544815	gi|15240915|ref|NP_195740.1|/7.27808e-155/duplicated SANT DNA-binding domain-containing protein [Arabidopsis thaliana]
AT3G16360	1.00158	1.53e-07	gi|334185397|ref|NP_001189912.1|/1.43703e-78/histidine-containing phosphotransfer protein 4 [Arabidopsis thaliana]
AT3G47600	1.00158	6.52e-09	gi|41619278|gb|AAS10065.1|/0/MYB transcription factor [Arabidopsis thaliana]
AT1G46768	1.00158	0.000292374	gi|18401592|ref|NP_564496.1|/3.41766e-83/ethylene-responsive transcription factor RAP2-1 [Arabidopsis thaliana]
AT5G58350	1.00052	4.69e-14	gi|75264276|sp|Q9LVL5.1|WNK4_ARATH/0/RecName: Full=Probable serine/threonine-protein kinase WNK4; Short=AtWNK4; AltName: Full=Protein kinase with no lysine 4 [Arabidopsis thaliana]
AT3G12590	-1.00117	8.8e-11	gi|240255333|ref|NP_187865.6|/0/uncharacterized protein [Arabidopsis thaliana]
AT4G17460	-1.0012	8.49e-26	gi|15236076|ref|NP_193476.1|/1.83193e-159/homeobox-leucine zipper protein HAT1 [Arabidopsis thaliana]
AT5G62520	-1.00406	5.39e-77	gi|15241862|ref|NP_201058.1|/1.20053e-178/probable inactive poly [ADP-ribose] polymerase SRO5 [Arabidopsis thaliana]
AT5G11420	-1.00758	7.76e-31	gi|15239049|ref|NP_196703.1|/0/uncharacterized protein [Arabidopsis thaliana]
AT5G55520	-1.0086	7.98e-05	gi|79537396|ref|NP_200363.2|/0/uncharacterized protein [Arabidopsis thaliana]
AT3G15620	-1.01223	0.000916906	gi|18400841|ref|NP_566520.1|/0/(6-4)DNA photolyase [Arabidopsis thaliana]
AT1G49130	-1.01581	5.24e-06	gi|30694486|ref|NP_175339.2|/0/zinc finger protein CONSTANS-LIKE 8 [Arabidopsis thaliana]
AT5G39020	-1.01581	5.24e-06	gi|75333905|sp|Q9FID6.1|Y5392_ARATH/0/RecName: Full=Probable receptor-like protein kinase At5g39020; Flags: Precursor [Arabidopsis thaliana]
AT1G19025	-1.01635	2.99e-06	gi|18394685|ref|NP_564070.1|/0/DNA repair metallo-beta-lactamase family protein [Arabidopsis thaliana]
AT1G65010	-1.01665	6.77e-34	gi|240254320|ref|NP_176681.4|/0/flower development-related protein [Arabidopsis thaliana]
AT4G01130	-1.01711	1.12e-15	gi|15234074|ref|NP_192022.1|/0/GDSL esterase/lipase [Arabidopsis thaliana]
AT4G31650	-1.01937	0.000188126	gi|15236032|ref|NP_194893.1|/0/B3 domain-containing protein REM6 [Arabidopsis thaliana]
AT4G23180	-1.021	5.49e-97	gi|30686087|ref|NP_567679.2|/0/cysteine-rich receptor-like protein kinase 10 [Arabidopsis thaliana]
AT1G56520	-1.02259	1.1e-12	gi|334183385|ref|NP_001185252.1|/0/TIR-NBS-LRR class disease resistance protein [Arabidopsis thaliana]
AT1G08610	-1.02337	0.000365708	gi|15223266|ref|NP_172337.1|/0/pentatricopeptide repeat-containing protein [Arabidopsis thaliana]
AT5G02160	-1.0239	8.98e-172	gi|240256251|ref|NP_195836.5|/2.97628e-68/uncharacterized protein [Arabidopsis thaliana]
AT3G50740	-1.02546	1.32e-25	gi|18409172|ref|NP_566938.1|/0/UDP-glucosyl transferase 72E1 [Arabidopsis thaliana]
AT2G24390	-1.03229	8.29e-05	gi|79561827|ref|NP_180015.3|/2.62657e-83/AIG2-like family protein [Arabidopsis thaliana]
AT3G10310	-1.03285	5.78e-08	gi|240255315|ref|NP_187642.4|/0/myosin and kinesin motor and CH domain-containing protein [Arabidopsis thaliana]
AT2G15890	-1.03305	1.88e-117	gi|18397956|ref|NP_565383.1|/1.48389e-115/maternal effect embryo arrest 14 protein [Arabidopsis thaliana]
AT2G19640	-1.03358	0.000781523	gi|30680748|ref|NP_849991.1|/0/histone-lysine N-methyltransferase ASHR2 [Arabidopsis thaliana]
AT2G17780	-1.03491	5.72e-16	gi|30680112|ref|NP_179369.2|/0/protein MID1-complementing activity 2 [Arabidopsis thaliana]
AT4G02070	-1.03526	1.69e-05	gi|15235223|ref|NP_192116.1|/0/DNA mismatch repair protein MSH6 [Arabidopsis thaliana]
AT3G20350	-1.03551	1.13e-07	gi|15231114|ref|NP_188670.1|/0/uncharacterized protein [Arabidopsis thaliana]
AT5G41060	-1.03608	3.51e-07	gi|15237549|ref|NP_198922.1|/0/DHHC-type zinc finger family protein [Arabidopsis thaliana]
AT1G66090	-1.0371	2.92e-47	gi|15218929|ref|NP_176783.1|/0/TIR-NBS class of disease resistance protein [Arabidopsis thaliana]
AT5G04310	-1.0371	0.000159693	gi|42567636|ref|NP_196051.2|/0/pectin lyase-like superfamily protein [Arabidopsis thaliana]
AT4G18880	-1.03844	1.05e-27	gi|15234053|ref|NP_193623.1|/0/heat stress transcription factor A-4a [Arabidopsis thaliana]
AT4G03205	-1.04167	4.29e-07	gi|79462676|ref|NP_567257.2|/8.36695e-141/coproporphyrinogen III oxidase 2 [Arabidopsis thaliana]
AT1G56540	-1.04244	2.01e-10	gi|15223555|ref|NP_176047.1|/0/TIR-NBS-LRR class disease resistance protein [Arabidopsis thaliana]
AT2G06925	-1.04314	4.68e-24	gi|18396422|ref|NP_565337.1|/1.12357e-83/phospholipase A2-alpha [Arabidopsis thaliana]
AT3G16180	-1.04524	8.35e-07	gi|15233307|ref|NP_188239.1|/0/probable peptide/nitrate transporter [Arabidopsis thaliana]
AT3G07980	-1.04848	6.11e-12	gi|15231910|ref|NP_187455.1|/0/mitogen-activated protein kinase kinase kinase 6 [Arabidopsis thaliana]
AT1G28330	-1.04889	2.25e-62	gi|334182913|ref|NP_001185105.1|/7.47328e-90/dormancy-associated protein-like 1 [Arabidopsis thaliana]
AT5G65120	-1.05222	4.4e-05	gi|18424914|ref|NP_569006.1|/0/uncharacterized protein [Arabidopsis thaliana]
AT1G44780	-1.05371	0.000377738	gi|79359845|ref|NP_175099.2|/0/uncharacterized protein [Arabidopsis thaliana]
AT2G25420	-1.05539	0.000135221	gi|145360312|ref|NP_565594.3|/0/transducin family protein / WD-40 repeat family protein [Arabidopsis thaliana]
AT5G23240	-1.05624	2.57e-24	gi|15237259|ref|NP_197715.1|/0/DNAJ heat shock N-terminal domain-containing protein [Arabidopsis thaliana]
AT4G21940	-1.0578	6.44e-22	gi|334186798|ref|NP_001190794.1|/0/calcium-dependent protein kinase 15 [Arabidopsis thaliana]
AT2G38630	-1.05854	8.52e-05	gi|30687585|ref|NP_181397.2|/0/transducin/WD40 repeat-like superfamily protein [Arabidopsis thaliana]
AT1G15125	-1.06167	1.02e-33	gi|186478506|ref|NP_683307.2|/0/S-adenosyl-L-methionine-dependent methyltransferase [Arabidopsis thaliana]
AT5G38210	-1.06255	1.72e-07	gi|22327431|ref|NP_198637.2|/0/protein kinase family protein [Arabidopsis thaliana]
AT3G23080	-1.06428	2.77e-17	gi|18403635|ref|NP_566722.1|/0/polyketide cyclase/dehydrase and lipid transport superfamily protein [Arabidopsis thaliana]
AT4G27440	-1.06668	0	gi|15234129|ref|NP_194474.1|/0/light-dependent NADPH:protochlorophyllide oxidoreductase B [Arabidopsis thaliana]
AT1G75380	-1.06756	2.05e-113	gi|15222221|ref|NP_177671.1|/0/bifunctional nuclease 1 [Arabidopsis thaliana]
AT1G74170	-1.07347	5e-10	gi|12323814|gb|AAG51873.1|AC079678_3/0/disease resistance protein, putative; 11609-15699 [Arabidopsis thaliana]
AT1G72280	-1.07532	1.87e-12	gi|15218421|ref|NP_177372.1|/0/endoplasmic oxidoreductin-1 [Arabidopsis thaliana]
AT2G15880	-1.08061	1.14e-69	gi|15226640|ref|NP_179188.1|/0/pollen-specific leucine-rich repeat extensin-like protein 3 [Arabidopsis thaliana]
AT1G30420	-1.08141	3.22e-11	gi|145336268|ref|NP_174331.2|/0/ABC transporter C family member 11 [Arabidopsis thaliana]
AT4G16960	-1.08589	0.000137785	gi|15235932|ref|NP_193429.1|/0/TIR-NBS-LRR class disease resistance protein [Arabidopsis thaliana]
AT2G41990	-1.08589	0.000613349	gi|15227481|ref|NP_181730.1|/1.13498e-170/uncharacterized protein [Arabidopsis thaliana]
AT5G55790	-1.08755	1.95e-05	gi|15241044|ref|NP_200390.1|/3.28734e-111/uncharacterized protein [Arabidopsis thaliana]
AT3G19240	-1.0894	0	gi|15230321|ref|NP_188555.1|/0/vacuolar import/degradation, Vid27-related protein [Arabidopsis thaliana]
AT5G13710	-1.09022	5.81e-92	gi|15240691|ref|NP_196875.1|/0/cycloartenol-c-24-methyltransferase [Arabidopsis thaliana]
AT1G11545	-1.09082	3.44e-20	gi|18391291|ref|NP_563892.1|/0/probable xyloglucan endotransglucosylase/hydrolase protein 8 [Arabidopsis thaliana]
AT4G39830	-1.09754	8.69e-12	gi|51536490|gb|AAU05483.1|/0/At4g39830 [Arabidopsis thaliana]
AT2G45180	-1.09878	0	gi|18406723|ref|NP_566036.1|/1.07302e-73/protease inhibitor/seed storage/lipid transfer protein (LTP) family protein [Arabidopsis thaliana]
AT1G56220	-1.09979	1.46e-126	gi|30696086|ref|NP_849820.1|/9.18042e-78/dormancy/auxin associated protein [Arabidopsis thaliana]
AT5G47020	-1.10123	9.66e-48	gi|334188236|ref|NP_199513.2|/0/uncharacterized protein [Arabidopsis thaliana]
AT2G31865	-1.10174	2.42e-21	gi|42571009|ref|NP_973578.1|/0/poly(ADP-ribose) glycohydrolase 2 [Arabidopsis thaliana]
AT1G33760	-1.10183	2.32e-09	gi|15217641|ref|NP_174636.1|/2.09691e-104/ethylene-responsive transcription factor ERF022 [Arabidopsis thaliana]
AT5G07590	-1.10191	2.7e-08	gi|42567726|ref|NP_196376.2|/0/WD40 domain-containing protein [Arabidopsis thaliana]
AT4G04340	-1.1045	1.49e-106	gi|15233476|ref|NP_192343.1|/0/early-responsive to dehydration stress-related protein [Arabidopsis thaliana]
AT5G06610	-1.10534	0.000183193	gi|15240096|ref|NP_196279.1|/0/uncharacterized protein [Arabidopsis thaliana]
AT4G36280	-1.11011	3.76e-07	gi|30690622|ref|NP_195351.2|/0/Histidine kinase-, DNA gyrase B-, and HSP90-like ATPase family protein [Arabidopsis thaliana]
AT2G32140	-1.11286	2.42e-51	gi|79567606|ref|NP_180773.3|/0/transmembrane receptor protein [Arabidopsis thaliana]
AT2G03530	-1.11473	2.58e-07	gi|145328256|ref|NP_001077874.1|/0/ureide permease 2 [Arabidopsis thaliana]
AT1G52290	-1.11709	8.09e-20	gi|15218207|ref|NP_175639.1|/0/proline-rich receptor-like protein kinase PERK15 [Arabidopsis thaliana]
AT3G27210	-1.11743	3.55e-63	gi|18405271|ref|NP_566811.1|/6.16805e-133/uncharacterized protein [Arabidopsis thaliana]
AT5G19250	-1.11821	4.31e-186	gi|15239687|ref|NP_197426.1|/3.29354e-109/GPI-anchored glycoprotein membrane precursor [Arabidopsis thaliana]
AT5G18590	-1.11848	1.9e-35	gi|30686896|ref|NP_197360.2|/0/kelch repeat-containing protein [Arabidopsis thaliana]
AT3G26490	-1.11944	0.000353132	gi|15231566|ref|NP_189280.1|/0/phototropic-responsive NPH3 family protein [Arabidopsis thaliana]
AT3G54920	-1.11998	2.61e-103	gi|32129905|sp|Q93Z04.1|PLY13_ARATH/0/RecName: Full=Probable pectate lyase 13; AltName: Full=Powdery mildew susceptibility protein; AltName: Full=Powdery mildew-resistant mutant 6; Flags: Precursor [Arabidopsis thaliana]
AT5G01950	-1.12004	1.13e-42	gi|145357530|ref|NP_195815.3|/0/leucine-rich repeat protein kinase-like protein [Arabidopsis thaliana]
AT5G51670	-1.12065	8.71e-05	gi|15242144|ref|NP_199980.1|/0/uncharacterized protein [Arabidopsis thaliana]
AT2G47930	-1.12071	9.23e-26	gi|18407486|ref|NP_566114.1|/5.47211e-70/arabinogalactan protein 26 [Arabidopsis thaliana]
AT5G32450	-1.12152	2.03e-43	gi|18421342|ref|NP_568522.1|/5.41007e-142/RNA recognition motif (RRM)-containing protein [Arabidopsis thaliana]
AT3G15540	-1.12771	3.74e-20	gi|15232612|ref|NP_188173.1|/9.22508e-112/auxin-responsive protein IAA19 [Arabidopsis thaliana]
AT2G31870	-1.13165	3.55e-08	gi|18402797|ref|NP_565730.1|/0/poly(ADP-ribose) glycohydrolase 1 [Arabidopsis thaliana]
AT3G60320	-1.13186	7.91e-73	gi|30695172|ref|NP_191591.2|/0/uncharacterized protein [Arabidopsis thaliana]
AT3G47860	-1.1329	7.29e-47	gi|15228268|ref|NP_190370.1|/0/chloroplastic lipocalin [Arabidopsis thaliana]
AT2G07680	-1.13509	9.47e-09	gi|334184186|ref|NP_178811.7|/0/multidrug resistance-associated protein 11 [Arabidopsis thaliana]
AT3G14870	-1.13593	1.37e-11	gi|79402192|ref|NP_188105.3|/0/uncharacterized protein [Arabidopsis thaliana]
AT3G55240	-1.13762	9.77e-10	gi|15233218|ref|NP_191084.1|/7.67375e-48/uncharacterized protein [Arabidopsis thaliana]
AT5G55230	-1.14195	4.73e-82	gi|334188417|ref|NP_001190542.1|/0/microtubule-associated protein 65-1 [Arabidopsis thaliana]
AT5G19780	-1.14216	2.36e-89	gi|15241168|ref|NP_197478.1|/0/tubulin alpha-3 [Arabidopsis thaliana]
AT5G22250	-1.14523	4.41e-39	gi|15242180|ref|NP_197617.1|/1.80366e-159/CCR4-associated factor 1B [Arabidopsis thaliana]
AT4G16940	-1.14563	0.000465135	gi|240255955|ref|NP_193427.4|/0/TIR-NBS-LRR class disease resistance protein [Arabidopsis thaliana]
AT3G54000	-1.14682	4.7e-15	gi|18409968|ref|NP_566992.1|/0/uncharacterized protein [Arabidopsis thaliana]
AT5G02200	-1.14846	5.12e-08	gi|145334279|ref|NP_001078521.1|/5.69289e-112/far-red-elongated hypocotyl1-like protein [Arabidopsis thaliana]
AT1G12080	-1.14892	2.03e-06	gi|30682601|ref|NP_849650.1|/1.02468e-68/vacuolar calcium-binding protein-like protein [Arabidopsis thaliana]
AT1G21090	-1.14919	8.11e-18	gi|18394953|ref|NP_564135.1|/1.8961e-140/uncharacterized protein [Arabidopsis thaliana]
AT1G22370	-1.15258	1.33e-05	gi|42571589|ref|NP_973885.1|/0/UDP-glucosyl transferase 85A5 [Arabidopsis thaliana]
AT4G18205	-1.1537	3.73e-10	gi|79325159|ref|NP_001031664.1|/0/nucleotide-sugar transporter family protein [Arabidopsis thaliana]
AT1G20620	-1.15585	0	gi|18394888|ref|NP_564120.1|/0/catalase 3 [Arabidopsis thaliana]
AT5G43440	-1.15866	6.01e-28	gi|15239868|ref|NP_199157.1|/0/1-aminocyclopropane-1-carboxylate oxidase-like protein 9 [Arabidopsis thaliana]
AT5G03050	-1.16031	2.62e-08	gi|30679873|ref|NP_195925.2|/3.05612e-73/uncharacterized protein [Arabidopsis thaliana]
AT2G33990	-1.16087	4.46e-10	gi|79567614|ref|NP_180946.2|/1.5262e-149/IQ-domain 9 protein [Arabidopsis thaliana]
AT1G05820	-1.16247	3.7e-05	gi|186478174|ref|NP_172073.2|/0/signal peptide peptidase-like 5 [Arabidopsis thaliana]
AT2G05810	-1.165	1.42e-40	gi|15224987|ref|NP_178638.1|/0/armadillo/beta-catenin-like repeats-containing protein [Arabidopsis thaliana]
AT4G00238	-1.16618	9.42e-05	gi|18411263|ref|NP_567159.1|/0/DNA-binding storekeeper protein-related transcriptional regulator [Arabidopsis thaliana]
AT4G01330	-1.16871	1.71e-25	gi|334186273|ref|NP_001190651.1|/0/protein kinase family protein [Arabidopsis thaliana]
AT4G23400	-1.17078	2.46e-30	gi|32363338|sp|Q8LAA6.2|PIP15_ARATH/4.64605e-166/RecName: Full=Probable aquaporin PIP1-5; Short=AtPIP1;5; AltName: Full=Plasma membrane intrinsic protein 1d; Short=PIP1d [Arabidopsis thaliana]
AT5G64870	-1.17143	5.51e-27	gi|15238290|ref|NP_201292.1|/0/SPFH/Band 7/PHB domain-containing membrane-associated protein family [Arabidopsis thaliana]
AT4G25940	-1.17387	1.52e-51	gi|22328940|ref|NP_194324.2|/0/ENTH/ANTH/VHS superfamily protein [Arabidopsis thaliana]
AT1G05630	-1.1775	1.54e-15	gi|79336245|ref|NP_172054.3|/0/Type I inositol-1,4,5-trisphosphate 5-phosphatase 13 [Arabidopsis thaliana]
AT5G12230	-1.1791	1.61e-64	gi|15239910|ref|NP_196784.1|/1.40757e-128/protein MED19A [Arabidopsis thaliana]
AT2G21660	-1.17997	0	gi|15226605|ref|NP_179760.1|/4.09649e-104/glycine-rich RNA-binding protein 7 [Arabidopsis thaliana]
AT4G19540	-1.18308	3.28e-11	gi|15235067|ref|NP_193689.1|/1.07483e-174/iron-sulfur protein required for NADH dehydrogenase [Arabidopsis thaliana]
AT5G65390	-1.18363	1.3e-58	gi|18424945|ref|NP_569011.1|/2.6826e-69/arabinogalactan protein 7 [Arabidopsis thaliana]
AT4G34770	-1.18429	8.06e-06	gi|15236188|ref|NP_195203.1|/2.10043e-53/SAUR-like auxin-responsive protein [Arabidopsis thaliana]
AT1G74670	-1.18497	2.41e-133	gi|30699033|ref|NP_177605.2|/2.25659e-60/gibberellin-regulated protein 6 [Arabidopsis thaliana]
AT5G46510	-1.18509	1.39e-16	gi|15237452|ref|NP_199463.1|/0/TIR-NBS-LRR class disease resistance protein [Arabidopsis thaliana]
AT1G10340	-1.18969	2.07e-05	gi|18391143|ref|NP_563867.1|/0/ankyrin repeat-containing protein [Arabidopsis thaliana]
AT3G01830	-1.1905	1.54e-65	gi|75337204|sp|Q9SGI8.1|CML40_ARATH/9.28062e-78/RecName: Full=Probable calcium-binding protein CML40; AltName: Full=Calmodulin-like protein 40 [Arabidopsis thaliana]
AT3G54790	-1.1928	9e-10	gi|30694120|ref|NP_191039.2|/0/U-box domain-containing protein 3 [Arabidopsis thaliana]
AT3G05130	-1.19351	1.14e-07	gi|15229907|ref|NP_187164.1|/0/uncharacterized protein [Arabidopsis thaliana]
AT4G38550	-1.1953	0	gi|22329240|ref|NP_195567.2|/0/phospholipase like protein (PEARLI 4) family [Arabidopsis thaliana]
AT4G39770	-1.1981	2.57e-06	gi|30692524|ref|NP_195687.2|/0/probable trehalose-phosphate phosphatase H [Arabidopsis thaliana]
AT3G47570	-1.19956	8.37e-12	gi|264664489|sp|C0LGP4.1|Y3475_ARATH/0/RecName: Full=Probable LRR receptor-like serine/threonine-protein kinase At3g47570; Flags: Precursor [Arabidopsis thaliana]
AT2G29065	-1.19969	9.57e-06	gi|334184550|ref|NP_001189628.1|/0/GRAS family transcription factor [Arabidopsis thaliana]
AT2G17850	-1.20171	1.98e-07	gi|145360051|ref|NP_565426.2|/4.21757e-87/rhodanese-like domain-containing protein 17 [Arabidopsis thaliana]
AT1G01240	-1.2025	1.13e-13	gi|18378816|ref|NP_563623.1|/0/uncharacterized protein [Arabidopsis thaliana]
AT4G17615	-1.2027	7.66e-130	gi|18414931|ref|NP_567533.1|/1.02754e-117/calcineurin B-like protein 1 [Arabidopsis thaliana]
AT5G52750	-1.20632	9.78e-19	gi|15237246|ref|NP_200087.1|/3.50109e-77/heavy metal transport/detoxification domain-containing protein [Arabidopsis thaliana]
AT1G10550	-1.21458	0.000337741	gi|15218558|ref|NP_172525.1|/0/probable xyloglucan endotransglucosylase/hydrolase protein 33 [Arabidopsis thaliana]
AT1G55450	-1.21556	3.03e-179	gi|334183341|ref|NP_001185239.1|/0/S-adenosyl-L-methionine-dependent methyltransferases superfamily protein [Arabidopsis thaliana]
AT1G20010	-1.22222	5.17e-226	gi|18394812|ref|NP_564101.1|/0/tubulin beta-5 chain [Arabidopsis thaliana]
AT1G79440	-1.22444	8.07e-82	gi|15219379|ref|NP_178062.1|/0/succinate-semialdehyde dehydrogenase [Arabidopsis thaliana]
AT2G34510	-1.22631	4.34e-79	gi|15226760|ref|NP_180998.1|/0/uncharacterized protein [Arabidopsis thaliana]
AT3G17700	-1.22883	1.89e-20	gi|18401606|ref|NP_566585.1|/0/cyclic nucleotide-binding transporter 1 [Arabidopsis thaliana]
AT2G18300	-1.23009	6.12e-40	gi|334184293|ref|NP_001189548.1|/0/transcription factor bHLH64 [Arabidopsis thaliana]
AT5G51550	-1.23051	4.82e-76	gi|15242118|ref|NP_199968.1|/0/protein EXORDIUM like 3 [Arabidopsis thaliana]
AT1G78280	-1.23174	0	gi|240254396|ref|NP_177951.6|/0/F-box protein [Arabidopsis thaliana]
AT1G29510	-1.23462	0.000582497	gi|18397123|ref|NP_564332.1|/6.29343e-74/protein SMALL AUXIN UPREGULATED 67 [Arabidopsis thaliana]
AT5G14920	-1.23509	0	gi|15242165|ref|NP_196996.1|/5.29955e-172/gibberellin-regulated protein 14 [Arabidopsis thaliana]
AT5G66900	-1.23607	2.1e-44	gi|15240126|ref|NP_201491.1|/0/CC-NBS-LRR class disease resistance protein [Arabidopsis thaliana]
AT3G25020	-1.23874	9.08e-06	gi|15230228|ref|NP_189138.1|/0/receptor like protein 42 [Arabidopsis thaliana]
AT5G66580	-1.2439	0.00011647	gi|15240014|ref|NP_201459.1|/1.50006e-84/uncharacterized protein [Arabidopsis thaliana]
AT5G41750	-1.24773	3.31e-51	gi|42568255|ref|NP_198990.3|/0/TIR-NBS-LRR class disease resistance protein [Arabidopsis thaliana]
AT2G42580	-1.25041	5.13e-50	gi|18406005|ref|NP_565976.1|/0/tetratricopetide-repeat thioredoxin-like 3 [Arabidopsis thaliana]
AT5G63140	-1.25324	1.47e-19	gi|15242654|ref|NP_201119.1|/0/purple acid phosphatase 29 [Arabidopsis thaliana]
AT2G24645	-1.25454	1.57e-05	gi|334184423|ref|NP_001189594.1|/0/transcriptional factor B3 family protein [Arabidopsis thaliana]
AT5G10430	-1.25594	1.59e-19	gi|15238164|ref|NP_196605.1|/6.93067e-73/arabinogalactan protein 4 [Arabidopsis thaliana]
AT5G14550	-1.26273	6.63e-15	gi|42567851|ref|NP_196959.2|/0/core-2/I-branching beta-1,6-N-acetylglucosaminyltransferase family protein [Arabidopsis thaliana]
AT3G06890	-1.26973	0.000135961	gi|18397751|ref|NP_566295.1|/4.03652e-65/uncharacterized protein [Arabidopsis thaliana]
AT4G14560	-1.26989	6.32e-16	gi|15233496|ref|NP_193192.1|/5.22053e-95/auxin-responsive protein IAA1 [Arabidopsis thaliana]
AT4G25020	-1.27526	0.000317076	gi|18416469|ref|NP_567715.1|/0/D111/G-patch domain-containing protein [Arabidopsis thaliana]
AT4G08470	-1.27913	1.81e-42	gi|15236509|ref|NP_192587.1|/0/MAPK/ERK kinase kinase 3 [Arabidopsis thaliana]
AT2G42870	-1.2864	1.12e-06	gi|18406084|ref|NP_565988.1|/4.3221e-59/protein PHYTOCHROME RAPIDLY REGULATED1 [Arabidopsis thaliana]
AT1G56720	-1.29121	7.46e-10	gi|18405946|ref|NP_564722.1|/0/protein kinase [Arabidopsis thaliana]
AT4G38070	-1.29121	0.000342113	gi|42567496|ref|NP_195520.2|/0/transcription factor bHLH131 [Arabidopsis thaliana]
AT5G46470	-1.31172	7.47e-63	gi|42568353|ref|NP_199459.2|/0/protein RESISTANT TO P. SYRINGAE 6 [Arabidopsis thaliana]
AT1G13210	-1.31907	1.32e-85	gi|15222212|ref|NP_172780.1|/0/autoinhibited Ca2+/ATPase II [Arabidopsis thaliana]
AT2G30600	-1.31925	1.68e-149	gi|334184586|ref|NP_001189642.1|/0/BTB/POZ domain-containing protein [Arabidopsis thaliana]
AT4G19520	-1.32147	1.59e-244	gi|334186704|ref|NP_193687.3|/0/TIR-NBS-LRR class disease resistance protein [Arabidopsis thaliana]
AT3G25400	-1.32284	3.88e-18	gi|30687841|ref|NP_189167.2|/1.19469e-77/uncharacterized protein [Arabidopsis thaliana]
AT5G05890	-1.32284	5.33e-05	gi|15239287|ref|NP_196208.1|/0/UDP-glycosyltransferase 76C5 [Arabidopsis thaliana]
AT5G12940	-1.32331	1.05e-22	gi|15239943|ref|NP_196798.1|/0/leucine-rich repeat-containing protein [Arabidopsis thaliana]
AT2G36410	-1.32418	5.1e-32	gi|18404123|ref|NP_565846.1|/2.94651e-102/uncharacterized protein [Arabidopsis thaliana]
AT3G59330	-1.32732	2.46e-05	gi|334186126|ref|NP_191492.2|/2.69296e-137/uncharacterized protein [Arabidopsis thaliana]
AT4G23220	-1.32732	1.01e-52	gi|240256045|ref|NP_567680.4|/0/cysteine-rich receptor-like protein kinase 14 [Arabidopsis thaliana]
AT3G01290	-1.32775	2.12e-127	gi|18395770|ref|NP_566135.1|/2.52355e-156/SPFH/Band 7/PHB domain-containing membrane-associated protein [Arabidopsis thaliana]
AT5G60100	-1.32934	1.01e-06	gi|334188508|ref|NP_001190575.1|/0/pseudo-response regulator 3 [Arabidopsis thaliana]
AT3G53800	-1.3371	1.34e-64	gi|15232329|ref|NP_190948.1|/0/hsp70-interacting protein FES1B-like protein [Arabidopsis thaliana]
AT5G22690	-1.33963	1.7e-39	gi|15242937|ref|NP_197661.1|/0/TIR-NBS-LRR class disease resistance protein [Arabidopsis thaliana]
AT5G10100	-1.34235	9.91e-31	gi|30683008|ref|NP_196572.2|/0/probable trehalose-phosphate phosphatase I [Arabidopsis thaliana]
AT1G63260	-1.35152	1.86e-14	gi|42562905|ref|NP_176515.3|/4.71832e-163/tetraspanin10 [Arabidopsis thaliana]
AT1G29430	-1.36871	0.000306436	gi|15218924|ref|NP_174236.1|/8.86e-73/protein SMALL AUXIN UPREGULATED 62 [Arabidopsis thaliana]
AT4G39890	-1.37013	2.11e-39	gi|15236081|ref|NP_195699.1|/3.02255e-117/Ras-related protein RABH1c [Arabidopsis thaliana]
AT4G23820	-1.37534	5.62e-53	gi|15236625|ref|NP_194113.1|/0/glycoside hydrolase family 28 protein / polygalacturonase (pectinase) family protein [Arabidopsis thaliana]
AT5G02170	-1.37563	6.26e-06	gi|22326569|ref|NP_195837.2|/0/transmembrane amino acid transporter family protein [Arabidopsis thaliana]
AT3G26740	-1.37978	0	gi|15231613|ref|NP_189308.1|/8.56173e-76/CCR-like protein [Arabidopsis thaliana]
AT1G29500	-1.39074	4.69e-05	gi|15218951|ref|NP_174243.1|/8.47217e-71/protein SMALL AUXIN UPREGULATED 66 [Arabidopsis thaliana]
AT3G48100	-1.39074	9.42e-07	gi|15228338|ref|NP_190393.1|/9.43448e-97/two-component response regulator ARR5 [Arabidopsis thaliana]
AT3G43960	-1.39074	0.000481062	gi|30315950|sp|Q9LXW3.1|CPR2_ARATH/0/RecName: Full=Probable cysteine proteinase At3g43960; Flags: Precursor [Arabidopsis thaliana]
AT5G47370	-1.39074	9.22e-65	gi|15238078|ref|NP_199548.1|/4.24053e-164/homeobox-leucine zipper protein HAT2 [Arabidopsis thaliana]
AT2G15042	-1.39074	3.68e-10	gi|238479250|ref|NP_001154519.1|/0/Leucine-rich repeat (LRR) family protein [Arabidopsis thaliana]
AT2G31110	-1.39074	1.39e-06	gi|145329999|ref|NP_001077985.1|/0/protein TRICHOME BIREFRINGENCE-LIKE 40 [Arabidopsis thaliana]
AT4G33625	-1.39574	9e-34	gi|30689751|ref|NP_849487.1|/2.21068e-108/uncharacterized protein [Arabidopsis thaliana]
AT5G20250	-1.39587	0	gi|19699067|gb|AAL90901.1|/0/AT5g20250/F5O24_140 [Arabidopsis thaliana]
AT4G14365	-1.40026	7.82e-124	gi|11762236|gb|AAG40396.1|AF325044_1/0/AT4g14360 [Arabidopsis thaliana]
AT1G64640	-1.40231	8.68e-37	gi|42562941|ref|NP_176645.3|/3.29497e-103/early nodulin-like protein 8 [Arabidopsis thaliana]
AT1G27460	-1.40326	3.01e-54	gi|18396347|ref|NP_564285.1|/0/calmodulin-binding protein [Arabidopsis thaliana]
AT2G42170	-1.4165	3.26e-07	gi|30688915|ref|NP_850363.1|/0/actin family protein [Arabidopsis thaliana]
AT2G24600	-1.42462	9.66e-193	gi|42570909|ref|NP_973528.1|/0/Ankyrin repeat family protein [Arabidopsis thaliana]
AT3G05900	-1.43038	1.59e-201	gi|30679640|ref|NP_187241.2|/0/neurofilament protein-related protein [Arabidopsis thaliana]
AT5G66640	-1.43381	1.11e-06	gi|334188682|ref|NP_001190638.1|/0/protein DA1-related 3 [Arabidopsis thaliana]
AT2G22980	-1.4425	5.85e-28	gi|145329595|ref|NP_001077947.1|/0/serine carboxypeptidase-like 13 [Arabidopsis thaliana]
AT5G22920	-1.44464	2.78e-68	gi|15237169|ref|NP_197683.1|/0/ring finger and CHY zinc finger domain-containing protein 1 [Arabidopsis thaliana]
AT4G20260	-1.44833	0	gi|79325185|ref|NP_001031677.1|/2.66485e-122/plasma-membrane associated cation-binding protein 1 [Arabidopsis thaliana]
AT2G46430	-1.44963	3.09e-14	gi|18407073|ref|NP_566075.1|/0/cyclic nucleotide gated channel 3 [Arabidopsis thaliana]
AT2G06850	-1.45353	0	gi|15225605|ref|NP_178708.1|/7.79593e-180/endoxyloglucan transferase A1 [Arabidopsis thaliana]
AT4G00950	-1.45559	3.81e-06	gi|15236999|ref|NP_192004.1|/6.21868e-166/uncharacterized protein [Arabidopsis thaliana]
AT1G77210	-1.46289	1.22e-05	gi|15223861|ref|NP_177845.1|/0/sugar transport protein 14 [Arabidopsis thaliana]
AT4G19530	-1.46294	1.2e-138	gi|15235064|ref|NP_193688.1|/0/TIR-NBS-LRR class disease resistance protein [Arabidopsis thaliana]
AT4G31050	-1.47253	1.82e-08	gi|18417727|ref|NP_567866.1|/1.47549e-161/Biotin/lipoate A/B protein ligase family [Arabidopsis thaliana]
AT1G26945	-1.48159	1.05e-40	gi|30689711|ref|NP_849712.1|/2.31774e-44/basic helix-loop-helix protein KIDARI [Arabidopsis thaliana]
AT2G11810	-1.48859	0.000184811	gi|18397057|ref|NP_565352.1|/0/Monogalactosyldiacylglycerol synthase 3 [Arabidopsis thaliana]
AT5G44680	-1.4895	1.13e-42	gi|15241554|ref|NP_199281.1|/0/putative 3-methyladenine glycosylase I [Arabidopsis thaliana]
AT1G11350	-1.49561	8.34e-18	gi|15220353|ref|NP_172602.1|/0/G-type lectin S-receptor-like serine/threonine-protein kinase SD1-13 [Arabidopsis thaliana]
AT4G12690	-1.49968	0.000401401	gi|15235452|ref|NP_193005.1|/1.42633e-167/uncharacterized protein [Arabidopsis thaliana]
AT1G23790	-1.49968	0.000401291	gi|42562279|ref|NP_173791.2|/0/uncharacterized protein [Arabidopsis thaliana]
AT1G30135	-1.50622	3.4e-59	gi|18397376|ref|NP_564349.1|/1.19997e-69/protein TIFY 5A [Arabidopsis thaliana]
AT1G22330	-1.50787	1.18e-28	gi|186478756|ref|NP_564168.2|/9.90528e-172/RNA recognition motif-containing protein [Arabidopsis thaliana]
AT5G52760	-1.50787	1.34e-14	gi|15237249|ref|NP_200088.1|/6.69947e-68/copper transport family protein [Arabidopsis thaliana]
AT1G56660	-1.50788	0	gi|15223583|ref|NP_176058.1|/0/uncharacterized protein [Arabidopsis thaliana]
AT5G63810	-1.51869	1.45e-53	gi|15242897|ref|NP_201186.1|/0/beta-galactosidase 10 [Arabidopsis thaliana]
AT5G20410	-1.5337	1.44e-07	gi|30687800|ref|NP_568394.2|/0/monogalactosyldiacylglycerol synthase 2 [Arabidopsis thaliana]
AT4G00970	-1.53551	1.01e-13	gi|42566214|ref|NP_567204.3|/0/cysteine-rich receptor-like protein kinase 41 [Arabidopsis thaliana]
AT1G51940	-1.54532	4.05e-63	gi|42562696|ref|NP_175606.2|/0/LysM type receptor kinase-like protein [Arabidopsis thaliana]
AT1G03100	-1.56067	0.000293756	gi|15218705|ref|NP_171809.1|/0/pentatricopeptide repeat-containing protein [Arabidopsis thaliana]
AT4G38560	-1.56321	2.11e-05	gi|145334263|ref|NP_001078512.1|/0/phospholipase like protein (PEARLI 4) [Arabidopsis thaliana]
AT3G59310	-1.56773	5.56e-39	gi|42572725|ref|NP_974458.1|/0/uncharacterized protein [Arabidopsis thaliana]
AT2G21510	-1.57837	2.78e-37	gi|15226572|ref|NP_179746.1|/0/DNAJ heat shock N-terminal domain-containing protein [Arabidopsis thaliana]
AT4G04955	-1.58156	8.63e-32	gi|18412757|ref|NP_567276.1|/0/allantoinase [Arabidopsis thaliana]
AT1G21270	-1.58373	1.34e-42	gi|15218959|ref|NP_173549.1|/0/wall-associated receptor kinase 2 [Arabidopsis thaliana]
AT5G42250	-1.58456	6.18e-37	gi|15238330|ref|NP_199040.1|/0/alcohol dehydrogenase-like 7 [Arabidopsis thaliana]
AT5G11610	-1.58868	1.09e-08	gi|15239118|ref|NP_196722.1|/0/Exostosin family protein [Arabidopsis thaliana]
AT3G19850	-1.59719	1.83e-19	gi|42565034|ref|NP_188619.2|/0/phototropic-responsive NPH3 family protein [Arabidopsis thaliana]
AT1G34760	-1.60224	8.84e-24	gi|42562526|ref|NP_564451.2|/3.59057e-140/14-3-3-like protein GF14 omicron [Arabidopsis thaliana]
AT1G57980	-1.61313	4.66e-05	gi|15217802|ref|NP_176099.1|/0/Nucleotide-sugar transporter family protein [Arabidopsis thaliana]
AT4G14400	-1.61751	1.1e-47	gi|18414210|ref|NP_567430.1|/0/protein ACCELERATED CELL DEATH 6 [Arabidopsis thaliana]
AT5G40450	-1.62736	0	gi|334188092|ref|NP_198861.4|/0/uncharacterized protein [Arabidopsis thaliana]
AT4G33290	-1.63175	3.36e-06	gi|15234134|ref|NP_195055.1|/0/F-box/kelch-repeat protein [Arabidopsis thaliana]
AT1G66940	-1.63271	1.18e-59	gi|18408651|ref|NP_564887.1|/0/protein kinase-related protein [Arabidopsis thaliana]
AT3G11010	-1.65237	1.28e-15	gi|30681577|ref|NP_187712.2|/0/receptor like protein 34 [Arabidopsis thaliana]
AT3G07195	-1.6532	1.34e-74	gi|22330901|ref|NP_683537.1|/2.08131e-135/RPM1-interacting protein 4 (RIN4) family protein [Arabidopsis thaliana]
AT1G66930	-1.66376	5.09e-07	gi|15219785|ref|NP_176865.1|/0/protein kinase family protein [Arabidopsis thaliana]
AT1G21100	-1.66638	1.05e-05	gi|15218133|ref|NP_173534.1|/0/indole glucosinolate o-methyltransferase 1 [Arabidopsis thaliana]
AT5G03120	-1.68959	2.65e-12	gi|15242643|ref|NP_195932.1|/2.19993e-39/uncharacterized protein [Arabidopsis thaliana]
AT2G26190	-1.70569	0	gi|18401055|ref|NP_565618.1|/0/calmodulin-binding protein [Arabidopsis thaliana]
AT1G22570	-1.70792	1.83e-129	gi|75313529|sp|Q9SK99.1|PTR11_ARATH/0/RecName: Full=Protein NRT1/ PTR FAMILY 5.15; Short=AtNPF5.15 [Arabidopsis thaliana]
AT5G10760	-1.71267	3.27e-05	gi|15238250|ref|NP_196637.1|/0/aspartyl protease family protein [Arabidopsis thaliana]
AT2G38465	-1.72778	3.4e-06	gi|18404761|ref|NP_565890.1|/9.05802e-41/uncharacterized protein [Arabidopsis thaliana]
AT3G47340	-1.74084	0	gi|15232775|ref|NP_190318.1|/0/asparagine synthetase [glutamine-hydrolyzing] [Arabidopsis thaliana]
AT5G53220	-1.74438	0.000310761	gi|79330747|ref|NP_001032066.1|/0/uncharacterized protein [Arabidopsis thaliana]
AT5G18080	-1.77776	9.99e-05	gi|15238736|ref|NP_197309.1|/1.05338e-44/small auxin up RNA 24 [Arabidopsis thaliana]
AT1G74440	-1.79688	1.14e-40	gi|15221258|ref|NP_177584.1|/1.28792e-117/uncharacterized protein [Arabidopsis thaliana]
AT1G35710	-1.80994	1.34e-58	gi|75175345|sp|Q9LP24.1|Y1571_ARATH/0/RecName: Full=Probable leucine-rich repeat receptor-like protein kinase At1g35710; Flags: Precursor [Arabidopsis thaliana]
AT5G06930	-1.82138	2.28e-08	gi|145357725|ref|NP_196310.2|/0/uncharacterized protein [Arabidopsis thaliana]
AT5G60900	-1.8382	0.000207221	gi|15239468|ref|NP_200898.1|/0/receptor-like protein kinase 1 [Arabidopsis thaliana]
AT1G21130	-1.86839	9.4e-205	gi|15218138|ref|NP_173537.1|/0/Indole glucosinolate O-methyltransferase 4 [Arabidopsis thaliana]
AT3G22235	-1.87073	2.08e-14	gi|238479866|ref|NP_001154638.1|/9.3802e-38/uncharacterized protein [Arabidopsis thaliana]
AT5G18030	-1.87617	0.000297544	gi|15238716|ref|NP_197304.1|/7.31991e-43/SAUR-like auxin-responsive protein [Arabidopsis thaliana]
AT4G04330	-1.88003	1.37e-79	gi|18412539|ref|NP_567263.1|/6.24698e-97/Chaperonin-like RbcX protein [Arabidopsis thaliana]
AT1G56140	-1.88187	0	gi|334183367|ref|NP_564709.2|/0/leucine-rich repeat transmembrane protein kinase [Arabidopsis thaliana]
AT4G26810	-1.89324	4.43e-05	gi|15236880|ref|NP_194411.1|/1.10659e-54/SWIB/MDM2 domain-containing protein [Arabidopsis thaliana]
AT5G38700	-1.89525	1.54e-80	gi|79527289|ref|NP_198686.2|/4.09513e-105/uncharacterized protein [Arabidopsis thaliana]
AT5G23210	-1.90304	1.06e-252	gi|79599038|ref|NP_851062.2|/0/serine carboxypeptidase-like 34 [Arabidopsis thaliana]
AT2G24610	-1.90531	1.4e-08	gi|30682497|ref|NP_850056.1|/0/cyclic nucleotide-gated channel 14 [Arabidopsis thaliana]
AT5G63770	-1.90845	0	gi|15242890|ref|NP_201182.1|/0/diacylglycerol kinase 2 [Arabidopsis thaliana]
AT2G20142	-1.91358	8.99e-12	gi|186501692|ref|NP_973487.2|/0/Toll-Interleukin-Resistance domain-containing protein [Arabidopsis thaliana]
AT3G62550	-1.98447	4.41e-165	gi|15228790|ref|NP_191814.1|/3.6194e-87/drought responsive ATP-binding motif containing protein [Arabidopsis thaliana]
AT1G68870	-1.98798	4.06e-06	gi|15221552|ref|NP_177053.1|/1.62841e-82/SOB five-like 2 protein [Arabidopsis thaliana]
AT1G15890	-2.00741	5.9e-05	gi|15218365|ref|NP_173041.1|/0/CC-NBS-LRR class disease resistance protein [Arabidopsis thaliana]
AT3G23800	-2.04282	0.000846244	gi|15229520|ref|NP_189022.1|/0/selenium-binding protein 3 [Arabidopsis thaliana]
AT4G35770	-2.06306	2.14e-170	gi|15233328|ref|NP_195302.1|/2.1032e-101/senescence-associated protein DIN1 [Arabidopsis thaliana]
AT1G01560	-2.06912	4.32e-189	gi|186478029|ref|NP_001117210.1|/0/mitogen-activated protein kinase 11 [Arabidopsis thaliana]
AT5G28630	-2.07631	3.27e-39	gi|15241873|ref|NP_198215.1|/1.05163e-81/glycine-rich protein [Arabidopsis thaliana]
AT2G42040	-2.0804	9.32e-46	gi|18405869|ref|NP_565964.1|/1.3028e-151/uncharacterized protein [Arabidopsis thaliana]
AT4G32280	-2.08079	1.17e-12	gi|18417976|ref|NP_567891.1|/1.01045e-147/auxin-responsive protein IAA29 [Arabidopsis thaliana]
AT4G23130	-2.09856	1.67e-05	gi|30686059|ref|NP_849425.1|/0/cysteine-rich receptor-like protein kinase 5 [Arabidopsis thaliana]
AT1G15580	-2.11736	9.02e-15	gi|15218243|ref|NP_173011.1|/1.89577e-91/auxin-responsive protein IAA5 [Arabidopsis thaliana]
AT5G51810	-2.12771	3.52e-05	gi|15242189|ref|NP_199994.1|/0/gibberellin 20 oxidase 2 [Arabidopsis thaliana]
AT2G32680	-2.12771	7.34e-12	gi|15225727|ref|NP_180827.1|/0/receptor like protein 23 [Arabidopsis thaliana]
AT1G79700	-2.13736	1.2e-78	gi|145327747|ref|NP_001077849.1|/0/AP2-like ethylene-responsive transcription factor WRI4 [Arabidopsis thaliana]
AT5G20260	-2.19044	1.49e-05	gi|292630785|sp|Q3E9A4.3|GLYT5_ARATH/0/RecName: Full=Probable glycosyltransferase At5g20260
AT3G61280	-2.20788	0.000154889	gi|79454960|ref|NP_191687.2|/0/lipopolysaccharide-modifying domain-containing protein [Arabidopsis thaliana]
AT5G06690	-2.24909	2.9e-109	gi|79327164|ref|NP_001031844.1|/7.68631e-121/WCRKC thioredoxin 1 [Arabidopsis thaliana]
AT2G22810	-2.29763	1.05e-10	gi|15227755|ref|NP_179866.1|/0/1-aminocyclopropane-1-carboxylate synthase [Arabidopsis thaliana]
AT2G14610	-2.4782	8.2e-07	gi|15225974|ref|NP_179068.1|/1.48341e-93/pathogenesis-related protein 1 [Arabidopsis thaliana]
AT3G03850	-2.50622	0.000872798	gi|30678959|ref|NP_187035.2|/1.72024e-47/SAUR-like auxin-responsive protein [Arabidopsis thaliana]
AT5G04010	-2.50622	0.000872575	gi|79506991|ref|NP_196021.2|/9.6876e-164/probable F-box protein [Arabidopsis thaliana]
AT5G65850	-2.50622	0.000873021	gi|15239182|ref|NP_201386.1|/0/F-box protein [Arabidopsis thaliana]
AT3G22231	-2.54828	1.44e-67	gi|18403306|ref|NP_566702.1|/4.38369e-43/protein PATHOGEN AND CIRCADIAN CONTROLLED 1 [Arabidopsis thaliana]
AT2G33830	-2.56869	0	gi|30685858|ref|NP_850220.1|/8.69115e-60/dormancy/auxin associated protein [Arabidopsis thaliana]
AT3G03660	-2.61313	5.25e-06	gi|186509725|ref|NP_001118563.1|/2.28691e-171/WUSCHEL related homeobox 11 [Arabidopsis thaliana]
AT3G57260	-2.62291	4.69e-20	gi|15230262|ref|NP_191285.1|/0/beta 1,3-glucanase 2 [Arabidopsis thaliana]
AT1G22740	-2.63718	4.21e-65	gi|15219943|ref|NP_173688.1|/1.13617e-115/GTP-binding protein Rab7 [Arabidopsis thaliana]
AT3G02410	-2.66376	0.000216484	gi|42563434|ref|NP_186890.2|/0/probable isoprenylcysteine alpha-carbonyl methylesterase ICMEL2 [Arabidopsis thaliana]
AT1G72645	-2.92126	0.000256855	gi|42572083|ref|NP_974132.1|/1.39321e-41/uncharacterized protein [Arabidopsis thaliana]
AT3G12220	-3.39074	0.000166139	gi|30682106|ref|NP_566414.3|/0/serine carboxypeptidase-like 16 [Arabidopsis thaliana]
AT1G65790	-3.48904	1.11e-29	gi|6686398|gb|AAF23832.1|AC007234_4/0/F1E22.15 [Arabidopsis thaliana]
AT2G14560	-3.56348	1.61e-92	gi|15225960|ref|NP_179062.1|/1.1916e-115/protein LURP1 [Arabidopsis thaliana]
AT3G44350	-4.17501	9.36e-13	gi|186510661|ref|NP_001118771.1|/1.03161e-138/putative NAC domain-containing protein 61 [Arabidopsis thaliana]
AT3G42800	-4.71267	9.76e-07	gi|15229158|ref|NP_189866.1|/0/uncharacterized protein [Arabidopsis thaliana]
AT5G26700	-7.42772	0.000291202	gi|18202101|sp|O65252.2|GL25_ARATH/4.31711e-116/RecName: Full=Probable germin-like protein subfamily 2 member 5; Flags: Precursor [Arabidopsis thaliana]
AT4G08593	-8.57889	7.91e-12	gi|22328496|ref|NP_680661.1|/2.31026e-156/uncharacterized protein [Arabidopsis thaliana]
AT2G18010	-8.67094	2.8e-05	gi|15227953|ref|NP_179392.1|/1.72841e-60/SAUR-like auxin-responsive protein [Arabidopsis thaliana]

## Sheet: AMI1ind IAM vs wt ctrl
#-------------------------------------------------------------------------------
#Differentielly expressed genes from RNAseq
#p values adjustment: fdr
#FDR filtered (q-value < 0.05)
#Expression threshold (log2FC > 1)
#-------------------------------------------------------------------------------
GeneID	log2FC Ratio	FDR (adj. p-value)	Description
AT5G50360	7.69715	9.22e-07	gi|15240662|ref|NP_199847.1|/4.16159e-170/uncharacterized protein [Arabidopsis thaliana]
AT5G24080	7.00739	9.22e-07	gi|18420747|ref|NP_568438.1|/0/G-type lectin S-receptor-like serine/threonine protein kinase [Arabidopsis thaliana]
AT3G01345	6.0841	1.64e-54	gi|42572219|ref|NP_974204.1|/0/uncharacterized protein [Arabidopsis thaliana]
AT4G33467	4.05683	1.17e-39	gi|145334209|ref|NP_001078485.1|/7.26548e-54/uncharacterized protein [Arabidopsis thaliana]
AT1G53480	3.91508	6.9e-13	gi|15220794|ref|NP_175753.1|/5.05065e-107/mto 1 responding down 1 protein [Arabidopsis thaliana]
AT3G48240	3.25483	1.64e-05	gi|15228362|ref|NP_190407.1|/1.55924e-101/Octicosapeptide/Phox/Bem1p family protein [Arabidopsis thaliana]
AT4G35720	3.14792	5.11e-05	gi|15237105|ref|NP_195297.1|/1.00002e-178/uncharacterized protein [Arabidopsis thaliana]
AT1G04570	2.87679	5.71e-26	gi|30678917|ref|NP_171951.2|/0/probable folate-biopterin transporter [Arabidopsis thaliana]
AT1G52690	2.76283	1.8e-125	gi|15219071|ref|NP_175678.1|/8.79758e-90/Late embryogenesis abundant protein (LEA) family protein [Arabidopsis thaliana]
AT1G70640	2.69005	4.63e-68	gi|15223211|ref|NP_177221.1|/1.06557e-96/octicosapeptide/Phox/Bem1p (PB1) domain-containing protein [Arabidopsis thaliana]
AT3G02010	2.66471	2.89e-14	gi|15232837|ref|NP_186850.1|/0/pentatricopeptide repeat-containing protein [Arabidopsis thaliana]
AT3G45660	2.6373	3.62e-11	gi|15231202|ref|NP_190152.1|/0/probable nitrate excretion transporter 2 [Arabidopsis thaliana]
AT1G07430	2.60502	3.8e-34	gi|15222398|ref|NP_172223.1|/0/protein phosphatase 2C 3 [Arabidopsis thaliana]
AT1G71000	2.53494	1.24e-07	gi|240254348|ref|NP_177256.4|/6.79897e-92/chaperone DnaJ-domain containing protein [Arabidopsis thaliana]
AT5G63300	2.52721	3.89e-09	gi|186532697|ref|NP_001119483.1|/4.81518e-118/ribosomal protein S21 family protein [Arabidopsis thaliana]
AT5G06760	2.51787	2.48e-55	gi|15240144|ref|NP_196294.1|/1.28848e-86/late embryogenesis abundant protein 4-5 [Arabidopsis thaliana]
AT5G42900	2.49409	1.98e-45	gi|30694165|ref|NP_851121.1|/6.3063e-139/cold regulated protein 27 [Arabidopsis thaliana]
AT2G42540	2.45468	0	gi|15227963|ref|NP_181782.1|/1.09087e-70/cold-regulated protein 15a [Arabidopsis thaliana]
AT2G35300	2.35437	1.19e-05	gi|15226951|ref|NP_181073.1|/1.38973e-49/late embryogenesis abundant protein 4-2 [Arabidopsis thaliana]
AT4G16146	2.34023	1.37e-52	gi|18414599|ref|NP_567486.1|/1.78955e-52/cAMP-regulated phosphoprotein 19-related protein [Arabidopsis thaliana]
AT2G42530	2.33738	1.65e-250	gi|15227952|ref|NP_181781.1|/1.67092e-71/cold-regulated protein 15b [Arabidopsis thaliana]
AT1G53490	2.29118	7.85e-09	gi|145336703|ref|NP_175754.2|/2.22294e-177/RING finger-containing protein HEI10 [Arabidopsis thaliana]
AT1G09350	2.27075	1.2e-60	gi|15217486|ref|NP_172406.1|/0/galactinol synthase 3 [Arabidopsis thaliana]
AT5G15960	2.26288	3.53e-193	gi|15237228|ref|NP_197100.1|/2.77564e-29/cold and ABA inducible protein kin1 [Arabidopsis thaliana]
AT5G54585	2.24544	1.05e-06	gi|22327834|ref|NP_680435.1|/4.10984e-70/uncharacterized protein [Arabidopsis thaliana]
AT4G21440	2.22682	1.44e-43	gi|18415694|ref|NP_567626.1|/0/R2R3 family MYB transcription factor [Arabidopsis thaliana]
AT1G17940	2.21736	1.94e-64	gi|145335845|ref|NP_173236.2|/0/Endosomal targeting BRO1-like domain-containing protein [Arabidopsis thaliana]
AT5G59220	2.18959	5.49e-67	gi|75170815|sp|Q9FIF5.1|P2C78_ARATH/0/RecName: Full=Probable protein phosphatase 2C 78; Short=AtPP2C78 [Arabidopsis thaliana]
AT4G30650	2.13731	3.86e-125	gi|15214227|sp|Q9M095.1|RC23_ARATH/2.5395e-35/RecName: Full=UPF0057 membrane protein At4g30650 [Arabidopsis thaliana]
AT1G16850	2.12386	1.82e-104	gi|18394409|ref|NP_564008.1|/5.47673e-81/uncharacterized protein [Arabidopsis thaliana]
AT3G05640	2.12335	5.53e-120	gi|75191636|sp|Q9M9W9.1|P2C34_ARATH/0/RecName: Full=Probable protein phosphatase 2C 34; Short=AtPP2C34 [Arabidopsis thaliana]
AT1G68050	2.10459	6.92e-19	gi|18408929|ref|NP_564919.1|/0/flavin-binding, kelch repeat, f box 1 [Arabidopsis thaliana]
AT3G05880	2.06776	3.06e-105	gi|15230062|ref|NP_187239.1|/4.56245e-24/Hydrophobic protein RCI2A [Arabidopsis thaliana]
AT5G05220	2.06282	1.75e-21	gi|10176734|dbj|BAB09965.1|/6.11937e-101/unnamed protein product [Arabidopsis thaliana]
AT4G37990	2.06165	1.19e-49	gi|15233643|ref|NP_195512.1|/0/cinnamyl alcohol dehydrogenase 8 [Arabidopsis thaliana]
AT3G14810	2.05223	8.04e-153	gi|186510070|ref|NP_188099.2|/0/mechanosensitive channel of small conductance-like 5 [Arabidopsis thaliana]
AT1G08890	2.03825	2.66e-27	gi|42561831|ref|NP_172364.3|/0/sugar transporter ERD6-like 1 [Arabidopsis thaliana]
AT5G15660	2.03244	0.000551337	gi|15242352|ref|NP_197070.1|/0/putative F-box protein [Arabidopsis thaliana]
AT2G45570	2.0261	9.61e-25	gi|15225512|ref|NP_182081.1|/0/cytochrome P450 76C2 [Arabidopsis thaliana]
AT5G10410	2.02037	3.83e-13	gi|15238149|ref|NP_196603.1|/0/ENTH/ANTH/VHS superfamily protein [Arabidopsis thaliana]
AT1G53470	2.01708	3.5e-50	gi|15220793|ref|NP_175752.1|/0/mechanosensitive channel of small conductance-like 4 [Arabidopsis thaliana]
AT5G14470	1.9918	0.000331178	gi|334187681|ref|NP_196951.3|/0/GHMP kinase family protein [Arabidopsis thaliana]
AT1G69480	1.9856	3.3e-73	gi|42563076|ref|NP_177107.2|/0/EXS (ERD1/XPR1/SYG1) family protein [Arabidopsis thaliana]
AT4G10250	1.98146	6.7e-15	gi|15234985|ref|NP_192763.1|/3.36343e-106/heat shock protein 22 [Arabidopsis thaliana]
AT5G47330	1.97852	4.15e-74	gi|15238063|ref|NP_199544.1|/0/palmitoyl protein thioesterase family protein [Arabidopsis thaliana]
AT3G03341	1.97586	1.08e-05	gi|186509714|ref|NP_001118559.1|/2.72122e-37/uncharacterized protein [Arabidopsis thaliana]
AT3G15670	1.96735	3.42e-07	gi|15232660|ref|NP_188188.1|/6.94467e-123/Late embryogenesis abundant protein (LEA) family protein [Arabidopsis thaliana]
AT5G46590	1.96533	7.52e-05	gi|15237469|ref|NP_199471.1|/4.77924e-174/NAC domain containing protein 96 [Arabidopsis thaliana]
AT1G51780	1.96533	4.09e-09	gi|15218029|ref|NP_175589.1|/0/IAA-amino acid hydrolase ILR1-like 5 [Arabidopsis thaliana]
AT3G55500	1.95844	1.05e-64	gi|15233283|ref|NP_191109.1|/2.37813e-155/expansin A16 [Arabidopsis thaliana]
AT1G11210	1.95645	1.64e-163	gi|18391249|ref|NP_563885.1|/3.0432e-174/uncharacterized protein [Arabidopsis thaliana]
AT1G23060	1.93056	0.000117729	gi|18395197|ref|NP_564188.1|/0/uncharacterized protein [Arabidopsis thaliana]
AT1G73510	1.91997	7.21e-08	gi|15219483|ref|NP_177493.1|/4.54649e-86/uncharacterized protein [Arabidopsis thaliana]
AT1G10060	1.91593	2.41e-32	gi|30681524|ref|NP_849629.1|/0/branched-chain-amino-acid aminotransferase 1 [Arabidopsis thaliana]
AT4G28140	1.90623	9.86e-71	gi|15234401|ref|NP_194543.1|/1.43899e-170/ethylene-responsive transcription factor ERF054 [Arabidopsis thaliana]
AT5G52310	1.89388	0	gi|15242967|ref|NP_200044.1|/0/protein LOW-TEMPERATURE-INDUCED 78 [Arabidopsis thaliana]
AT2G33380	1.89251	0	gi|15226103|ref|NP_180896.1|/2.08547e-136/caleosin 3 [Arabidopsis thaliana]
AT1G48100	1.88891	9.25e-24	gi|15221078|ref|NP_175244.1|/0/polygalacturonase [Arabidopsis thaliana]
AT5G07010	1.86997	0	gi|18415376|ref|NP_568177.1|/0/sulfotransferase 2A [Arabidopsis thaliana]
AT2G40080	1.85841	0.000283943	gi|18405258|ref|NP_565922.1|/1.62308e-58/protein EARLY FLOWERING 4 [Arabidopsis thaliana]
AT1G68500	1.85687	1.37e-08	gi|30697693|ref|NP_177017.2|/4.83664e-50/uncharacterized protein [Arabidopsis thaliana]
AT5G15970	1.84968	0	gi|15237236|ref|NP_197101.1|/1.05474e-28/stress-induced protein KIN2 [Arabidopsis thaliana]
AT5G51990	1.8398	1.9e-06	gi|15242244|ref|NP_200012.1|/9.90677e-130/dehydration-responsive element-binding protein 1D [Arabidopsis thaliana]
AT3G56790	1.8398	2.54e-12	gi|15229008|ref|NP_191238.1|/1.21877e-112/RNA splicing factor-related protein [Arabidopsis thaliana]
AT5G23240	1.83712	1.04e-25	gi|15237259|ref|NP_197715.1|/0/DNAJ heat shock N-terminal domain-containing protein [Arabidopsis thaliana]
AT2G02990	1.83401	2.03e-70	gi|15227068|ref|NP_178399.1|/1.78608e-137/ribonuclease 1 [Arabidopsis thaliana]
AT1G52890	1.80905	1.06e-171	gi|15219112|ref|NP_175697.1|/0/NAC domain-containing protein 19 [Arabidopsis thaliana]
AT2G28900	1.80731	5.51e-298	gi|15226998|ref|NP_180456.1|/6.38e-79/outer plastid envelope protein 16-1 [Arabidopsis thaliana]
AT4G11190	1.77968	6.1e-09	gi|15237088|ref|NP_192858.1|/4.67144e-104/disease resistance-responsive, dirigent domain-containing protein [Arabidopsis thaliana]
AT5G57050	1.7728	7.7e-26	gi|15242022|ref|NP_200515.1|/0/protein phosphatase 2C 77 [Arabidopsis thaliana]
AT1G12710	1.76362	7.19e-08	gi|15222051|ref|NP_172731.1|/8.10303e-174/phloem protein 2-A12 [Arabidopsis thaliana]
AT1G56600	1.75668	1.27e-43	gi|15223567|ref|NP_176053.1|/0/galactinol synthase 2 [Arabidopsis thaliana]
AT5G09470	1.75623	4.25e-10	gi|15242423|ref|NP_196509.1|/0/dicarboxylate carrier 3 [Arabidopsis thaliana]
AT1G56300	1.75154	4.43e-38	gi|18405757|ref|NP_564717.1|/8.49811e-88/chaperone DnaJ-domain containing protein [Arabidopsis thaliana]
AT1G22470	1.74432	8.47e-09	gi|6587841|gb|AAF18530.1|AC006551_16/1.34012e-76/Hypothetical protein [Arabidopsis thaliana]
AT4G22620	1.73871	2.89e-11	gi|116831383|gb|ABK28644.1|/6.73411e-91/unknown [Arabidopsis thaliana]
AT2G36780	1.73833	8.94e-18	gi|15228034|ref|NP_181216.1|/0/UDP-glucosyl transferase 73C3 [Arabidopsis thaliana]
AT3G51400	1.73288	0.000598882	gi|15230473|ref|NP_190708.1|/9.52339e-153/uncharacterized protein [Arabidopsis thaliana]
AT1G17665	1.72905	1.3e-08	gi|334182657|ref|NP_564031.2|/0/uncharacterized protein [Arabidopsis thaliana]
AT5G24570	1.72566	2.47e-43	gi|18420809|ref|NP_568448.1|/9.11208e-33/uncharacterized protein [Arabidopsis thaliana]
AT4G16563	1.7089	4.55e-46	gi|18414692|ref|NP_567506.1|/0/aspartyl protease family protein [Arabidopsis thaliana]
AT1G29395	1.70842	1.58e-234	gi|18397077|ref|NP_564328.1|/6.50002e-121/cold regulated 314 inner membrane 1 [Arabidopsis thaliana]
AT1G10585	1.70804	9.04e-209	gi|79340924|ref|NP_563873.2|/5.83301e-96/basic helix-loop-helix domain-containing protein [Arabidopsis thaliana]
AT3G01840	1.70229	2.32e-09	gi|15232204|ref|NP_186833.1|/0/LysM-containing receptor-like kinase [Arabidopsis thaliana]
AT3G63060	1.6827	3.06e-19	gi|18412596|ref|NP_567137.1|/5.956e-160/EID1-like F-box protein 3 [Arabidopsis thaliana]
AT3G50970	1.68131	0	gi|15230361|ref|NP_190666.1|/1.32604e-115/dehydrin Xero 2 [Arabidopsis thaliana]
AT5G15940	1.68014	0.000185388	gi|186523242|ref|NP_197098.2|/0/Rossmann-fold NAD(P)-binding domain-containing protein [Arabidopsis thaliana]
AT2G17830	1.6763	9.16e-09	gi|42569114|ref|NP_179373.2|/0/F-box protein [Arabidopsis thaliana]
AT3G19270	1.65512	3.45e-38	gi|18402179|ref|NP_566628.1|/0/abscisic acid 8'-hydroxylase 4 [Arabidopsis thaliana]
AT2G36640	1.65488	5.57e-10	gi|4415909|gb|AAD20140.1|/0/late embryogenesis abundant protein (AtECP63) [Arabidopsis thaliana]
AT2G28190	1.65072	1.39e-53	gi|18401659|ref|NP_565666.1|/2.69918e-121/copper/zinc superoxide dismutase 2 [Arabidopsis thaliana]
AT2G22200	1.64388	5.65e-05	gi|15227162|ref|NP_179810.1|/2.40131e-147/ethylene-responsive transcription factor ERF056 [Arabidopsis thaliana]
AT2G34850	1.6396	5.68e-11	gi|93172441|sp|O64749.3|ARAE2_ARATH/1.95194e-134/RecName: Full=Putative UDP-arabinose 4-epimerase 2; AltName: Full=UDP-D-xylose 4-epimerase 2 [Arabidopsis thaliana]
AT2G41230	1.6319	2.27e-16	gi|30688575|ref|NP_850348.1|/1.24859e-42/uncharacterized protein [Arabidopsis thaliana]
AT3G04010	1.62924	2e-107	gi|42563478|ref|NP_187051.3|/0/O-glycosyl hydrolases family 17 protein [Arabidopsis thaliana]
AT1G21790	1.6254	4.55e-72	gi|18395035|ref|NP_564152.1|/2.92817e-168/TRAM, LAG1 and CLN8 (TLC) lipid-sensing domain containing protein [Arabidopsis thaliana]
AT2G36750	1.62333	1.01e-19	gi|15228031|ref|NP_181213.1|/0/UDP-glucosyl transferase 73C1 [Arabidopsis thaliana]
AT1G62045	1.6174	0.000244986	gi|3367537|gb|AAC28522.1|/2.41894e-33/Contains similarity to ANK repeat region of Fowlpox virus BamHI-orf7 protein homolog C18F10.7 gi|485107 from Caenorhabditis elegans cosmid gb|U00049. This gene is continued from unannotated gene on BAC F19K23 gb|AC000375 [Arabidopsis thaliana]
AT3G20810	1.6174	1.72e-05	gi|30685945|ref|NP_850617.1|/0/jumonji-C domain-containing protein 30 [Arabidopsis thaliana]
AT1G32860	1.60007	6.62e-148	gi|30692765|ref|NP_174563.2|/0/glucan endo-1,3-beta-glucosidase 11 [Arabidopsis thaliana]
AT4G14270	1.59879	2.27e-12	gi|18414176|ref|NP_567425.1|/1.54654e-80/polyadenylate-binding protein-interacting protein 2 [Arabidopsis thaliana]
AT2G39030	1.58025	1.22e-26	gi|18404927|ref|NP_565898.1|/3.53976e-130/L-ornithine N5-acetyltransferase NATA1 [Arabidopsis thaliana]
AT2G40340	1.56772	2.73e-28	gi|18405354|ref|NP_565929.1|/0/dehydration-responsive element-binding protein 2C [Arabidopsis thaliana]
AT5G15820	1.56296	0.000186696	gi|15242399|ref|NP_197086.1|/0/RING/U-box domain-containing protein [Arabidopsis thaliana]
AT3G28007	1.56082	1.14e-11	gi|18405611|ref|NP_566829.1|/2.25628e-139/bidirectional sugar transporter SWEET4 [Arabidopsis thaliana]
AT4G13290	1.56082	1.14e-11	gi|15235661|ref|NP_193065.1|/0/cytochrome P450 71A19 [Arabidopsis thaliana]
AT5G16960	1.556	0.000536335	gi|15237883|ref|NP_197198.1|/0/zinc-binding dehydrogenase family protein [Arabidopsis thaliana]
AT2G27270	1.556	0.000536179	gi|15225863|ref|NP_180295.1|/1.05934e-129/uncharacterized protein [Arabidopsis thaliana]
AT4G25433	1.55501	6.77e-14	gi|22328924|ref|NP_680740.1|/5.06207e-60/peptidoglycan-binding LysM domain-containing protein [Arabidopsis thaliana]
AT5G67620	1.5495	1.17e-06	gi|15240787|ref|NP_201563.1|/1.72052e-103/uncharacterized protein [Arabidopsis thaliana]
AT1G52560	1.54597	2.07e-29	gi|15219028|ref|NP_175665.1|/2.30163e-132/heat shock protein 26.5 [Arabidopsis thaliana]
AT4G21215	1.54434	8.64e-12	gi|42572973|ref|NP_974583.1|/7.50182e-109/uncharacterized protein [Arabidopsis thaliana]
AT1G53920	1.5394	2.99e-16	gi|30695607|ref|NP_175795.2|/0/GDSL esterase/lipase 5 [Arabidopsis thaliana]
AT5G18540	1.53833	9.91e-06	gi|79516197|ref|NP_197355.2|/9.53614e-89/uncharacterized protein [Arabidopsis thaliana]
AT2G21130	1.53706	5.08e-17	gi|15226467|ref|NP_179709.1|/5.11035e-99/peptidyl-prolyl cis-trans isomerase CYP19-2 [Arabidopsis thaliana]
AT3G12510	1.53357	5.9e-26	gi|15230509|ref|NP_187857.1|/1.9737e-95/MADS-box family protein [Arabidopsis thaliana]
AT1G53540	1.53015	1.75e-29	gi|8671873|gb|AAF78436.1|AC018748_15/1.06479e-85/Contains similarity to 17.6 KD class I heat shock protein from Arabidopsis thaliana gi|P13853 and contains Hsp20/alpha crystallin PF|00011 and signal peptidase I PF|00461 domains. ESTs gb|AI998650, gb|AW004417, gb|AI998904 come from this gene [Arabidopsis thaliana]
AT3G20520	1.52721	4.88e-05	gi|15232292|ref|NP_188688.1|/0/glycerophosphodiester phosphodiesterase-like protein [Arabidopsis thaliana]
AT3G62740	1.5268	7.55e-24	gi|42566152|ref|NP_191833.2|/0/beta glucosidase 7 [Arabidopsis thaliana]
AT4G24390	1.52635	1.29e-22	gi|30686516|ref|NP_567702.2|/0/auxin signaling F-BOX 4 [Arabidopsis thaliana]
AT5G39050	1.5248	0	gi|240256381|ref|NP_568561.4|/0/phenolic glucoside malonyltransferase 1 [Arabidopsis thaliana]
AT5G42825	1.52277	8.28e-05	gi|42573549|ref|NP_974871.1|/2.53268e-51/uncharacterized protein [Arabidopsis thaliana]
AT2G26150	1.50519	1.08e-19	gi|15225255|ref|NP_180184.1|/0/heat stress transcription factor A-2 [Arabidopsis thaliana]
AT2G22450	1.50005	2.36e-25	gi|75223259|sp|Q6NLQ7.1|RIBA2_ARATH/0/RecName: Full=Monofunctional riboflavin biosynthesis protein RIBA 2, chloroplastic; Includes: RecName: Full=3,4-dihydroxy-2-butanone 4-phosphate synthase; Short=DHBP synthase; Includes: RecName: Full=Inactive GTP cyclohydrolase-2; AltName: Full=GTP cyclohydrolase II; Flags: Precursor [Arabidopsis thaliana]
AT3G49710	1.49584	1.37e-19	gi|15229194|ref|NP_190540.1|/0/pentatricopeptide repeat-containing protein [Arabidopsis thaliana]
AT1G50750	1.49087	1.53e-25	gi|15223637|ref|NP_175490.1|/0/plant mobile domain family protein [Arabidopsis thaliana]
AT1G69260	1.49051	8.87e-56	gi|18409228|ref|NP_564956.1|/0/ABI five binding protein [Arabidopsis thaliana]
AT4G17550	1.48965	5.12e-23	gi|30684088|ref|NP_193488.2|/0/glycerol-3-phosphate permease 4 [Arabidopsis thaliana]
AT4G24040	1.48382	8.96e-10	gi|15233663|ref|NP_194135.1|/0/trehalase 1 [Arabidopsis thaliana]
AT5G12020	1.46749	2.22e-33	gi|15239846|ref|NP_196763.1|/1.11984e-84/class II heat shock protein 17.6 [Arabidopsis thaliana]
AT4G14060	1.46467	7.54e-14	gi|15236401|ref|NP_193142.1|/4.21241e-86/major latex protein-like protein [Arabidopsis thaliana]
AT1G49450	1.46408	4.34e-30	gi|15222143|ref|NP_175369.1|/0/WD40 domain-containing protein [Arabidopsis thaliana]
AT1G20440	1.46204	0	gi|15217937|ref|NP_173468.1|/2.64104e-149/dehydrin COR47 [Arabidopsis thaliana]
AT4G21323	1.44748	2.32e-05	gi|18415671|ref|NP_567624.1|/0/Subtilase family protein [Arabidopsis thaliana]
AT5G44210	1.44748	6.92e-06	gi|15241432|ref|NP_199234.1|/4.30441e-112/ethylene-responsive transcription factor 9 [Arabidopsis thaliana]
AT1G73390	1.43911	4.71e-99	gi|15219459|ref|NP_177482.1|/0/Endosomal targeting BRO1-like domain-containing protein [Arabidopsis thaliana]
AT1G76955	1.43843	0.000433034	gi|42572137|ref|NP_974159.1|/5.97823e-40/uncharacterized protein [Arabidopsis thaliana]
AT4G23600	1.4353	0	gi|15236533|ref|NP_194091.1|/0/cystine lyase CORI3 [Arabidopsis thaliana]
AT5G37300	1.4273	3.35e-05	gi|9758716|dbj|BAB09102.1|/0/unnamed protein product [Arabidopsis thaliana]
AT1G04220	1.42684	4.11e-23	gi|15219676|ref|NP_171918.1|/0/3-ketoacyl-CoA synthase 2 [Arabidopsis thaliana]
AT4G35160	1.42239	3.25e-20	gi|15236282|ref|NP_195242.1|/0/O-methyltransferase family protein [Arabidopsis thaliana]
AT1G51090	1.42	0	gi|15223738|ref|NP_175520.1|/5.16745e-101/uncharacterized protein [Arabidopsis thaliana]
AT2G24560	1.41946	5.67e-05	gi|145360286|ref|NP_180032.2|/0/GDSL esterase/lipase [Arabidopsis thaliana]
AT5G12030	1.41795	3.53e-43	gi|15239849|ref|NP_196764.1|/8.79417e-85/heat shock protein 17.6A [Arabidopsis thaliana]
AT2G19450	1.41636	5.75e-35	gi|15224779|ref|NP_179535.1|/0/diacylglycerol O-acyltransferase 1 [Arabidopsis thaliana]
AT5G13990	1.41387	6.49e-07	gi|15240761|ref|NP_196903.1|/0/exocyst subunit exo70 family protein C2 [Arabidopsis thaliana]
AT1G09530	1.40581	6.54e-47	gi|15217533|ref|NP_172424.1|/0/transcription factor PIF3 [Arabidopsis thaliana]
AT4G13280	1.40441	3.69e-06	gi|145340172|ref|NP_193064.2|/0/terpenoid synthase 12 [Arabidopsis thaliana]
AT3G24420	1.40113	2.53e-28	gi|15230110|ref|NP_189085.1|/5.08814e-151/hydrolase, alpha/beta fold family protein [Arabidopsis thaliana]
AT5G54165	1.39876	2.31e-21	gi|116830839|gb|ABK28376.1|/4.09066e-41/unknown [Arabidopsis thaliana]
AT4G34950	1.39744	3.03e-11	gi|15236224|ref|NP_195221.1|/0/major facilitator family protein [Arabidopsis thaliana]
AT4G33980	1.39344	9.14e-09	gi|334187142|ref|NP_001190907.1|/8.74617e-132/uncharacterized protein [Arabidopsis thaliana]
AT4G10960	1.39262	2.58e-11	gi|15236988|ref|NP_192834.1|/0/UDP-glucose 4-epimerase 5 [Arabidopsis thaliana]
AT5G01740	1.3909	8e-07	gi|15241041|ref|NP_195794.1|/6.81007e-94/Nuclear transport factor 2 (NTF2) family protein [Arabidopsis thaliana]
AT3G17130	1.3909	8e-07	gi|15228972|ref|NP_188338.1|/7.59916e-99/plant invertase/pectin methylesterase inhibitor domain-containing protein [Arabidopsis thaliana]
AT1G05100	1.38699	2.24e-77	gi|15220416|ref|NP_172003.1|/0/mitogen-activated protein kinase kinase kinase 18 [Arabidopsis thaliana]
AT1G20030	1.38687	4.11e-13	gi|42571559|ref|NP_973870.1|/0/pathogenesis-related thaumatin-like protein [Arabidopsis thaliana]
AT4G34230	1.38602	5.78e-162	gi|15235295|ref|NP_195149.1|/0/cinnamyl alcohol dehydrogenase 5 [Arabidopsis thaliana]
AT3G59530	1.38294	0.000889055	gi|15231703|ref|NP_191512.1|/0/pollen development protein LAP3 [Arabidopsis thaliana]
AT2G46370	1.38259	0	gi|334184935|ref|NP_001189757.1|/0/jasmonic acid-amido synthetase JAR1 [Arabidopsis thaliana]
AT2G47780	1.38036	9.02e-06	gi|15227131|ref|NP_182299.1|/3.41501e-131/Rubber elongation factor protein [Arabidopsis thaliana]
AT5G11150	1.37822	4.45e-08	gi|15238971|ref|NP_196676.1|/4.38574e-122/vesicle-associated membrane protein 713 [Arabidopsis thaliana]
AT4G38580	1.37394	2.5e-39	gi|15233937|ref|NP_195570.1|/6.22845e-85/farnesylated protein 6 [Arabidopsis thaliana]
AT5G45950	1.36747	3.12e-51	gi|15237350|ref|NP_199407.1|/0/GDSL esterase/lipase [Arabidopsis thaliana]
AT4G34650	1.36336	2.63e-10	gi|145353033|ref|NP_195191.2|/0/squalene synthase 2 [Arabidopsis thaliana]
AT2G46680	1.35806	8.42e-48	gi|15226424|ref|NP_182191.1|/1.03025e-150/homeobox-leucine zipper protein ATHB-7 [Arabidopsis thaliana]
AT2G02100	1.35061	1.42e-115	gi|15226872|ref|NP_178319.1|/1.57791e-40/defensin-like protein 2 [Arabidopsis thaliana]
AT3G55940	1.34947	2.51e-09	gi|15228780|ref|NP_191153.1|/0/phosphoinositide phospholipase C 7 [Arabidopsis thaliana]
AT1G64890	1.3461	9.34e-06	gi|18408153|ref|NP_564843.1|/0/probable folate-biopterin transporter 7 [Arabidopsis thaliana]
AT5G24470	1.3439	7.66e-62	gi|18420797|ref|NP_568446.1|/0/pseudo-response regulator 5 [Arabidopsis thaliana]
AT5G03720	1.34314	1.6e-19	gi|22326589|ref|NP_195992.2|/0/heat shock transcription factor A3 [Arabidopsis thaliana]
AT5G66400	1.33031	8.42e-39	gi|15239373|ref|NP_201441.1|/3.99105e-111/dehydrin Rab18 [Arabidopsis thaliana]
AT1G77520	1.33012	0.000468271	gi|15223976|ref|NP_177876.1|/0/O-methyltransferase family protein [Arabidopsis thaliana]
AT2G40750	1.32757	7.51e-24	gi|15226740|ref|NP_181607.1|/0/WRKY DNA-binding protein 54 [Arabidopsis thaliana]
AT2G01610	1.32195	1.84e-09	gi|15226321|ref|NP_178270.1|/2.1986e-121/invertase/pectin methylesterase inhibitor-like protein [Arabidopsis thaliana]
AT1G03070	1.32195	1.13e-05	gi|15218701|ref|NP_171806.1|/3.15544e-138/protein lifeguard 4 [Arabidopsis thaliana]
AT4G26080	1.31972	7.29e-59	gi|15236110|ref|NP_194338.1|/0/protein phosphatase 2C 56 [Arabidopsis thaliana]
AT3G46670	1.31472	3.13e-55	gi|15232618|ref|NP_190251.1|/0/UDP-glucosyl transferase 76E11 [Arabidopsis thaliana]
AT4G33905	1.31284	9.23e-42	gi|18418319|ref|NP_567940.1|/4.09602e-147/Peroxisomal membrane protein Mpv17/PMP22 [Arabidopsis thaliana]
AT3G04000	1.30523	7.41e-31	gi|30679011|ref|NP_566221.2|/7.55185e-147/aldehyde reductase [Arabidopsis thaliana]
AT2G15970	1.30474	2.27e-230	gi|15226654|ref|NP_179196.1|/7.30947e-109/cold regulated 413 plasma membrane 1 [Arabidopsis thaliana]
AT2G15890	1.30296	1.56e-79	gi|18397956|ref|NP_565383.1|/1.48389e-115/maternal effect embryo arrest 14 protein [Arabidopsis thaliana]
AT2G47890	1.30286	2.8e-58	gi|15227152|ref|NP_182310.1|/0/zinc finger protein CONSTANS-LIKE 13 [Arabidopsis thaliana]
AT3G46230	1.29818	1.24e-24	gi|15231372|ref|NP_190209.1|/3.02251e-85/heat shock protein 17.4 [Arabidopsis thaliana]
AT1G20450	1.29806	0	gi|30686832|ref|NP_850947.1|/8.19251e-148/dehydrin ERD10 [Arabidopsis thaliana]
AT5G04370	1.29548	0.000558692	gi|79326918|ref|NP_001031831.1|/0/methyltransferase family protein NAMT1 [Arabidopsis thaliana]
AT2G27200	1.29446	2.17e-16	gi|15225856|ref|NP_180288.1|/0/P-loop containing nucleoside triphosphate hydrolase-like protein [Arabidopsis thaliana]
AT1G60470	1.29297	5.3e-07	gi|15219093|ref|NP_176250.1|/0/galactinol synthase 4 [Arabidopsis thaliana]
AT3G29575	1.29106	4.79e-26	gi|15230001|ref|NP_189598.1|/3.40777e-128/Ninja-family protein AFP3 [Arabidopsis thaliana]
AT1G05680	1.28305	3.1e-90	gi|15221233|ref|NP_172059.1|/0/Uridine diphosphate glycosyltransferase 74E2 [Arabidopsis thaliana]
AT1G78600	1.27725	1.5e-38	gi|334183994|ref|NP_001185428.1|/0/light-regulated zinc finger protein 1 [Arabidopsis thaliana]
AT4G27670	1.27191	3.17e-05	gi|15234240|ref|NP_194497.1|/7.56523e-125/heat shock protein 21 [Arabidopsis thaliana]
AT4G33930	1.26948	1.62e-09	gi|15235180|ref|NP_195119.1|/0/glycine-rich protein [Arabidopsis thaliana]
AT1G54100	1.26798	3.15e-255	gi|15221042|ref|NP_175812.1|/0/aldehyde dehydrogenase 7B4 [Arabidopsis thaliana]
AT2G21620	1.26486	2.03e-115	gi|30681474|ref|NP_850016.1|/3.27374e-106/dessication responsive protein [Arabidopsis thaliana]
AT2G42150	1.26322	8.89e-07	gi|15227892|ref|NP_181745.1|/0/DNA-binding bromodomain-containing protein [Arabidopsis thaliana]
AT5G16380	1.25483	8.18e-06	gi|18417957|ref|NP_568330.1|/2.75146e-108/uncharacterized protein [Arabidopsis thaliana]
AT4G15550	1.25346	1.18e-131	gi|18414478|ref|NP_567471.1|/0/UDP-glucose:indole-3-acetate beta-D-glucosyltransferase [Arabidopsis thaliana]
AT5G22500	1.25058	1.63e-36	gi|15242260|ref|NP_197642.1|/0/fatty acyl-CoA reductase 1 [Arabidopsis thaliana]
AT4G25200	1.25035	2.93e-06	gi|15234969|ref|NP_194250.1|/2.99185e-114/small heat shock protein 23.6 [Arabidopsis thaliana]
AT5G54960	1.24989	4.72e-104	gi|15240423|ref|NP_200307.1|/0/pyruvate decarboxylase-2 [Arabidopsis thaliana]
AT3G05800	1.24704	4.49e-07	gi|18397368|ref|NP_566260.1|/1.40556e-111/activation-tagged BRI1 suppressor 1-interacting factor 1 [Arabidopsis thaliana]
AT4G06746	1.24256	6.95e-15	gi|30680326|ref|NP_849340.1|/6.11976e-82/ethylene-responsive transcription factor RAP2-9 [Arabidopsis thaliana]
AT1G16030	1.24132	4.37e-75	gi|15219109|ref|NP_173055.1|/0/heat shock protein 70B [Arabidopsis thaliana]
AT1G02205	1.24103	4.1e-77	gi|334182234|ref|NP_001184890.1|/0/protein ECERIFERUM 1 [Arabidopsis thaliana]
AT2G43820	1.239	7.62e-107	gi|15224368|ref|NP_181910.1|/0/UDP-glucosyltransferase 74F2 [Arabidopsis thaliana]
AT4G22530	1.23613	7.49e-30	gi|15235684|ref|NP_193984.1|/3.57997e-151/S-adenosyl-L-methionine-dependent methyltransferase domain-containing protein [Arabidopsis thaliana]
AT3G46640	1.23379	1.75e-26	gi|334185766|ref|NP_001190022.1|/0/transcription factor LUX [Arabidopsis thaliana]
AT2G01520	1.23004	2.06e-26	gi|18379240|ref|NP_565264.1|/2.91718e-87/MLP-like protein 328 [Arabidopsis thaliana]
AT3G52905	1.22509	0.000656665	gi|145332817|ref|NP_001078274.1|/1.80741e-90/polynucleotidyl transferase/ ribonuclease H-like protein [Arabidopsis thaliana]
AT2G18170	1.22509	2.06e-10	gi|15224120|ref|NP_179409.1|/0/mitogen-activated protein kinase 7 [Arabidopsis thaliana]
AT3G15630	1.21831	3.13e-05	gi|18400843|ref|NP_566521.1|/3.20927e-54/uncharacterized protein [Arabidopsis thaliana]
AT5G59720	1.21789	1.27e-13	gi|15238509|ref|NP_200780.1|/5.45984e-88/heat shock protein 18.2 [Arabidopsis thaliana]
AT5G01520	1.21687	0.000201761	gi|15241003|ref|NP_195772.1|/1.1116e-140/C3HC4 type RING finger protein [Arabidopsis thaliana]
AT5G44260	1.21631	2.47e-24	gi|15241451|ref|NP_199239.1|/0/zinc finger CCCH domain-containing protein 61 [Arabidopsis thaliana]
AT4G24960	1.21595	0	gi|18416458|ref|NP_567713.1|/1.49201e-75/HVA22-like protein d [Arabidopsis thaliana]
AT1G67970	1.20932	2.05e-08	gi|15220611|ref|NP_176964.1|/0/heat stress transcription factor A-8 [Arabidopsis thaliana]
AT4G11600	1.20929	1.56e-201	gi|30681827|ref|NP_192897.2|/2.6334e-128/glutathione peroxidase 6 [Arabidopsis thaliana]
AT4G25990	1.20609	1.87e-05	gi|30687076|ref|NP_849445.1|/0/CIA2-like transcription factor [Arabidopsis thaliana]
AT3G07650	1.19719	1.85e-07	gi|15231491|ref|NP_187422.1|/0/zinc finger protein CONSTANS-LIKE 9 [Arabidopsis thaliana]
AT2G40300	1.19522	1.81e-20	gi|15225679|ref|NP_181559.1|/1.94e-141/ferritin 4 [Arabidopsis thaliana]
AT3G55970	1.19463	8.58e-86	gi|15228785|ref|NP_191156.1|/0/jasmonate-regulated protein JRG21 [Arabidopsis thaliana]
AT4G33540	1.19321	7.09e-55	gi|22329127|ref|NP_195080.2|/0/metallo-beta-lactamase family protein [Arabidopsis thaliana]
AT2G40230	1.19164	0.000644178	gi|15225663|ref|NP_181552.1|/0/putative CoA-dependent acyltransferase [Arabidopsis thaliana]
AT3G56400	1.19018	8.1e-82	gi|15228907|ref|NP_191199.1|/4.52712e-172/WRKY transcription factor 70 [Arabidopsis thaliana]
AT2G21660	1.18732	7.24e-160	gi|15226605|ref|NP_179760.1|/4.09649e-104/glycine-rich RNA-binding protein 7 [Arabidopsis thaliana]
AT4G01130	1.18702	1.08e-09	gi|15234074|ref|NP_192022.1|/0/GDSL esterase/lipase [Arabidopsis thaliana]
AT5G57060	1.18625	6.01e-05	gi|18423932|ref|NP_568847.1|/2.69989e-77/uncharacterized protein [Arabidopsis thaliana]
AT5G48250	1.17978	1.6e-10	gi|15238918|ref|NP_199636.1|/0/zinc finger protein CONSTANS-LIKE 10 [Arabidopsis thaliana]
AT1G07400	1.17951	1.57e-22	gi|15222395|ref|NP_172220.1|/9.01402e-85/class I heat shock protein [Arabidopsis thaliana]
AT3G24090	1.17852	4.21e-07	gi|9294678|dbj|BAB03027.1|/0/glutamine-fructose-6-phosphate transaminase 2 [Arabidopsis thaliana]
AT4G05100	1.17792	2.09e-44	gi|15234593|ref|NP_192419.1|/0/myb domain protein 74 [Arabidopsis thaliana]
AT4G31860	1.17324	9.43e-81	gi|75266736|sp|Q9SZ53.1|P2C60_ARATH/0/RecName: Full=Probable protein phosphatase 2C 60; Short=AtPP2C60 [Arabidopsis thaliana]
AT1G73330	1.16744	3.89e-138	gi|15219441|ref|NP_177476.1|/9.82377e-118/protein drought-repressed 4 [Arabidopsis thaliana]
AT5G67520	1.1663	0.000229415	gi|18425199|ref|NP_569050.1|/4.29336e-176/adenosine-5'-phosphosulfate kinase 4 [Arabidopsis thaliana]
AT2G18050	1.16571	0.000745635	gi|15227957|ref|NP_179396.1|/3.00632e-87/histone H1-3 [Arabidopsis thaliana]
AT5G58070	1.16343	0	gi|15242942|ref|NP_200615.1|/5.39406e-108/temperature-induced lipocalin TIL1 [Arabidopsis thaliana]
AT5G04250	1.16245	3.79e-24	gi|18414504|ref|NP_568136.1|/0/OTU-like cysteine protease family protein [Arabidopsis thaliana]
AT3G47160	1.15935	1.68e-09	gi|334185791|ref|NP_001190025.1|/2.78471e-148/RING/U-box domain-containing protein [Arabidopsis thaliana]
AT2G36770	1.15897	9.53e-07	gi|15228033|ref|NP_181215.1|/0/UDP-glucosyl transferase 73C4 [Arabidopsis thaliana]
AT2G17280	1.15625	4.63e-29	gi|15227803|ref|NP_179320.1|/2.74785e-157/phosphoglycerate mutase-like protein [Arabidopsis thaliana]
AT1G69870	1.15561	0	gi|18409391|ref|NP_564979.1|/0/nitrate transporter 1.7 [Arabidopsis thaliana]
AT1G80130	1.15286	3.1e-71	gi|18412668|ref|NP_565230.1|/2.47156e-176/tetratricopeptide repeat domain-containing protein [Arabidopsis thaliana]
AT2G07734	1.15062	9.56e-05	gi|13449315|ref|NP_085497.1|/0/ribosomal protein S4 [Arabidopsis thaliana]
AT3G09540	1.14443	8.7e-23	gi|15232712|ref|NP_187565.1|/0/pectin lyase-like superfamily protein [Arabidopsis thaliana]
AT1G26770	1.14056	5.78e-26	gi|145324020|ref|NP_001077599.1|/2.36052e-155/expansin A10 [Arabidopsis thaliana]
AT3G09350	1.13626	3.42e-51	gi|18398480|ref|NP_566349.1|/0/protein Fes1A [Arabidopsis thaliana]
AT1G76620	1.13432	0.00013066	gi|18411161|ref|NP_565137.1|/0/uncharacterized protein [Arabidopsis thaliana]
AT4G25480	1.13398	2.8e-05	gi|18416559|ref|NP_567720.1|/2.60831e-124/dehydration-responsive element-binding protein 1A [Arabidopsis thaliana]
AT4G35190	1.13398	2.8e-05	gi|18418592|ref|NP_567978.1|/9.63968e-128/cytokinin riboside 5'-monophosphate phosphoribohydrolase LOG5 [Arabidopsis thaliana]
AT5G28300	1.13287	2.79e-74	gi|30691229|ref|NP_568506.2|/0/trihelix transcription factor GTL2 [Arabidopsis thaliana]
AT2G43520	1.1293	0.000426851	gi|15224297|ref|NP_181880.1|/2.67874e-48/trypsin inhibitor protein 2 [Arabidopsis thaliana]
AT3G11020	1.12642	1.57e-10	gi|15228427|ref|NP_187713.1|/0/dehydration-responsive element-binding protein 2B [Arabidopsis thaliana]
AT1G49350	1.12436	0.000301401	gi|18402606|ref|NP_564543.1|/0/pfkB-type carbohydrate kinase-like protein [Arabidopsis thaliana]
AT2G41540	1.12418	1.83e-19	gi|15227377|ref|NP_181685.1|/0/glycerol-3-phosphate dehydrogenase [NAD(+)] GPDHC1 [Arabidopsis thaliana]
AT3G62590	1.11558	4.02e-06	gi|18412427|ref|NP_567131.1|/0/alpha/beta-Hydrolases superfamily protein [Arabidopsis thaliana]
AT4G02170	1.1149	2.26e-05	gi|79460805|ref|NP_192126.2|/3.13498e-98/uncharacterized protein [Arabidopsis thaliana]
AT1G25250	1.11408	3.44e-14	gi|15222537|ref|NP_173896.1|/0/shoot gravitropism5-like protein [Arabidopsis thaliana]
AT1G69750	1.10879	7.4e-05	gi|12322293|gb|AAG51175.1|AC079285_8/1.33871e-52/hypothetical protein [Arabidopsis thaliana]
AT2G22690	1.10811	1.39e-06	gi|18400050|ref|NP_565541.1|/0/zinc ion binding protein [Arabidopsis thaliana]
AT4G28240	1.10602	1.83e-08	gi|15215820|gb|AAK91455.1|/1.25626e-42/AT4g28240/F26K10_120 [Arabidopsis thaliana]
AT4G05330	1.09853	2.25e-06	gi|75155915|sp|Q8LFN9.1|AGD13_ARATH/0/RecName: Full=Probable ADP-ribosylation factor GTPase-activating protein AGD13; Short=ARF GAP AGD13; AltName: Full=Protein ARF-GAP DOMAIN 13; Short=AtAGD13 [Arabidopsis thaliana]
AT1G02065	1.09773	1.81e-05	gi|22329284|ref|NP_683267.1|/0/squamosa promoter binding protein-like 8 [Arabidopsis thaliana]
AT2G22870	1.09518	0.000119571	gi|18400109|ref|NP_565543.1|/2.74884e-172/GTP-binding protein EMB2001 [Arabidopsis thaliana]
AT2G16630	1.09277	5.84e-33	gi|22325715|ref|NP_179254.2|/0/pollen Ole e 1 allergen and extensin family protein [Arabidopsis thaliana]
AT5G61290	1.08947	4.36e-06	gi|15240198|ref|NP_200937.1|/0/flavin-containing monooxygenase FMO GS-OX-like 8 [Arabidopsis thaliana]
AT5G51440	1.08741	9.97e-19	gi|15242086|ref|NP_199957.1|/1.34298e-114/heat shock protein 23.5 [Arabidopsis thaliana]
AT4G10270	1.08738	7.18e-20	gi|3695408|gb|AAC62808.1|/2.34669e-44/contains similarity to Solanum lycopersicum (tomato) wound-induced protein (GB:X59882) [Arabidopsis thaliana]
AT3G03640	1.08667	4.34e-65	gi|15228597|ref|NP_187014.1|/0/beta glucosidase 25 [Arabidopsis thaliana]
AT2G34810	1.08608	8.79e-24	gi|15226834|ref|NP_181027.1|/0/FAD-binding and BBE domain-containing protein [Arabidopsis thaliana]
AT3G25480	1.08307	2.44e-10	gi|18404538|ref|NP_566766.1|/1.59082e-146/Rhodanese/Cell cycle control phosphatase superfamily protein [Arabidopsis thaliana]
AT2G39980	1.08017	2.16e-48	gi|116830503|gb|ABK28209.1|/0/unknown [Arabidopsis thaliana]
AT4G33985	1.07488	2.43e-06	gi|18418346|ref|NP_567947.1|/1.09113e-84/uncharacterized protein [Arabidopsis thaliana]
AT5G67480	1.06916	3.68e-63	gi|42573822|ref|NP_975007.1|/0/BTB and TAZ domain protein 4 [Arabidopsis thaliana]
AT1G10370	1.06774	7.37e-270	gi|240254051|ref|NP_172508.4|/8.63569e-129/glutathione S-transferase U17 [Arabidopsis thaliana]
AT1G62710	1.06568	2.12e-20	gi|15221556|ref|NP_176458.1|/0/vacuolar-processing enzyme beta [Arabidopsis thaliana]
AT3G56090	1.06353	2.93e-87	gi|15228818|ref|NP_191168.1|/6.66769e-142/ferritin 3 [Arabidopsis thaliana]
AT5G27280	1.06303	5.77e-24	gi|15240479|ref|NP_198080.1|/5.75726e-121/Zim17-type zinc finger protein [Arabidopsis thaliana]
AT3G20395	1.06282	0.000153007	gi|116830763|gb|ABK28339.1|/1.94083e-125/unknown [Arabidopsis thaliana]
AT2G32510	1.06046	7.56e-05	gi|15225692|ref|NP_180810.1|/0/mitogen-activated protein kinase kinase kinase 17 [Arabidopsis thaliana]
AT4G25490	1.06005	9.56e-18	gi|18416562|ref|NP_567721.1|/1.93337e-124/dehydration-responsive element-binding protein 1B [Arabidopsis thaliana]
AT5G58600	1.0571	4e-10	gi|15237711|ref|NP_200668.1|/0/protein POWDERY MILDEW RESISTANT 5 [Arabidopsis thaliana]
AT5G64230	1.05414	1.11e-08	gi|42568759|ref|NP_568987.2|/0/uncharacterized protein [Arabidopsis thaliana]
AT1G15520	1.05364	2.1e-50	gi|15218218|ref|NP_173005.1|/0/ABC transporter G family member 40 [Arabidopsis thaliana]
AT4G20970	1.0535	3.7e-06	gi|22328838|ref|NP_193829.2|/1.23445e-102/basic helix-loop-helix domain-containing protein [Arabidopsis thaliana]
AT2G33830	1.04804	2.03e-15	gi|30685858|ref|NP_850220.1|/8.69115e-60/dormancy/auxin associated protein [Arabidopsis thaliana]
AT5G55180	1.04802	3.51e-120	gi|238481568|ref|NP_001154780.1|/0/O-Glycosyl hydrolases family 17 protein [Arabidopsis thaliana]
AT4G27560	1.04666	2.36e-90	gi|15234195|ref|NP_194486.1|/0/UDP-glycosyltransferase 79B2 [Arabidopsis thaliana]
AT2G29500	1.0459	2.66e-26	gi|15227552|ref|NP_180511.1|/9.94388e-83/HSP20 family protein [Arabidopsis thaliana]
AT5G30495	1.04271	3.48e-06	gi|30692242|ref|NP_851091.1|/2.52177e-109/Fcf2 pre-rRNA processing protein [Arabidopsis thaliana]
AT2G37770	1.04207	2.02e-18	gi|255311879|pdb|3H7U|A/0/Chain A, Crystal Structure Of The Plant Stress-Response Enzyme Akr4c9
AT2G15960	1.04171	7.14e-44	gi|18397979|ref|NP_565384.1|/4.75096e-37/uncharacterized protein [Arabidopsis thaliana]
AT5G03210	1.03857	3.79e-19	gi|9757772|dbj|BAB08381.1|/2.44177e-30/unnamed protein product [Arabidopsis thaliana]
AT5G35320	1.03244	9.88e-14	gi|15238476|ref|NP_198382.1|/3.80184e-129/uncharacterized protein [Arabidopsis thaliana]
AT2G01170	1.03244	2.96e-12	gi|18379164|ref|NP_565254.1|/0/bidirectional amino acid transporter 1 [Arabidopsis thaliana]
AT4G21380	1.03244	2.27e-08	gi|15234427|ref|NP_193869.1|/0/receptor kinase 3 [Arabidopsis thaliana]
AT1G14120	1.03244	2.76e-05	gi|15223094|ref|NP_172864.1|/2.90455e-180/2-oxoglutarate (2OG) and Fe(II)-dependent oxygenase-like protein [Arabidopsis thaliana]
AT1G21540	1.03244	1.14e-05	gi|15219014|ref|NP_173573.1|/0/probable acyl-activating enzyme 9 [Arabidopsis thaliana]
AT5G03030	1.02925	4.64e-18	gi|15242611|ref|NP_195923.1|/5.2041e-57/chaperone DnaJ-domain containing protein [Arabidopsis thaliana]
AT3G25770	1.02459	0	gi|18404656|ref|NP_566776.1|/3.77763e-142/allene oxide cyclase 2 [Arabidopsis thaliana]
AT1G77000	1.02304	1.8e-06	gi|18411319|ref|NP_565147.1|/0/F-box protein SKP2B [Arabidopsis thaliana]
AT2G20560	1.01868	1.89e-24	gi|15225377|ref|NP_179646.1|/0/DNAJ heat shock family protein [Arabidopsis thaliana]
AT4G17140	1.01825	6.41e-47	gi|334186631|ref|NP_001190747.1|/0/pleckstrin homology (PH) domain-containing protein [Arabidopsis thaliana]
AT2G16700	1.01362	9.95e-21	gi|18398187|ref|NP_565390.1|/1.44751e-78/actin depolymerizing factor 5 [Arabidopsis thaliana]
AT4G18050	1.0134	1.71e-20	gi|240255983|ref|NP_193539.6|/0/P-glycoprotein 9 [Arabidopsis thaliana]
AT2G22980	1.01281	4.09e-06	gi|145329595|ref|NP_001077947.1|/0/serine carboxypeptidase-like 13 [Arabidopsis thaliana]
AT4G04330	1.01226	1.3e-08	gi|18412539|ref|NP_567263.1|/6.24698e-97/Chaperonin-like RbcX protein [Arabidopsis thaliana]
AT1G55500	1.01067	9.16e-33	gi|334183343|ref|NP_001185240.1|/0/uncharacterized protein [Arabidopsis thaliana]
AT3G56260	1.00778	5.85e-05	gi|334186016|ref|NP_001190104.1|/1.47281e-109/uncharacterized protein [Arabidopsis thaliana]
AT5G19440	1.00626	5e-177	gi|15239741|ref|NP_197445.1|/0/alcohol dehydrogenase-like protein [Arabidopsis thaliana]
AT5G58700	1.00452	1.85e-23	gi|30697116|ref|NP_200678.2|/0/phosphoinositide phospholipase C 4 [Arabidopsis thaliana]
AT1G71240	1.00378	7.78e-23	gi|30698785|ref|NP_177280.2|/0/uncharacterized protein [Arabidopsis thaliana]
AT4G01870	1.00301	0	gi|15234357|ref|NP_192096.1|/0/tolB-related protein [Arabidopsis thaliana]
AT4G19390	1.00181	3.25e-09	gi|18415304|ref|NP_567583.1|/1.6368e-149/uncharacterized protein [Arabidopsis thaliana]
AT1G17100	-1.00226	3.19e-40	gi|15220033|ref|NP_173153.1|/1.34934e-132/SOUL heme-binding protein [Arabidopsis thaliana]
AT4G18360	-1.00261	3.9e-05	gi|15236857|ref|NP_193570.1|/0/glycolate oxidase [Arabidopsis thaliana]
AT5G21100	-1.00484	4.4e-29	gi|15242154|ref|NP_197609.1|/0/L-ascorbate oxidase [Arabidopsis thaliana]
AT4G35640	-1.00569	8.46e-05	gi|42567425|ref|NP_195289.3|/0/serine acetyltransferase 3;2 [Arabidopsis thaliana]
AT5G05270	-1.00709	2.76e-30	gi|18414838|ref|NP_568154.1|/1.0166e-114/Chalcone-flavanone isomerase family protein [Arabidopsis thaliana]
AT1G73040	-1.00709	0.000115302	gi|15219349|ref|NP_177447.1|/1.009e-102/Mannose-binding lectin superfamily protein [Arabidopsis thaliana]
AT5G26260	-1.00987	6.26e-07	gi|18421006|ref|NP_568483.1|/0/TRAF-like family protein [Arabidopsis thaliana]
AT2G34390	-1.01195	7.37e-08	gi|15226298|ref|NP_180986.1|/8.53946e-160/aquaporin NIP2-1 [Arabidopsis thaliana]
AT4G17770	-1.01316	3.81e-17	gi|172044488|sp|O23617.2|TPS5_ARATH/0/RecName: Full=Alpha,alpha-trehalose-phosphate synthase [UDP-forming] 5; AltName: Full=Trehalose-6-phosphate synthase 5; Short=AtTPS5 [Arabidopsis thaliana]
AT3G49810	-1.01592	0.000537005	gi|18408953|ref|NP_566927.1|/0/U-box domain-containing protein 30 [Arabidopsis thaliana]
AT1G42550	-1.01606	1.85e-54	gi|240254220|ref|NP_174979.5|/0/plastid movement impaired1 [Arabidopsis thaliana]
AT2G36690	-1.0194	0.000848931	gi|42569681|ref|NP_181207.2|/0/2-oxoglutarate (2OG) and Fe(II)-dependent oxygenase superfamily protein [Arabidopsis thaliana]
AT3G02050	-1.02033	2.73e-20	gi|15232841|ref|NP_186854.1|/0/potassium transporter KUP3p [Arabidopsis thaliana]
AT4G37560	-1.02201	1.09e-14	gi|18420071|ref|NP_568029.1|/0/acetamidase/formamidase family protein [Arabidopsis thaliana]
AT3G21390	-1.0237	1.65e-05	gi|9294686|dbj|BAB03052.1|/0/mitochondrial carrier protein-like [Arabidopsis thaliana]
AT5G39580	-1.02414	5.56e-24	gi|15241812|ref|NP_198774.1|/0/peroxidase 62 [Arabidopsis thaliana]
AT2G36120	-1.02668	2.89e-20	gi|15227583|ref|NP_181156.1|/1.00485e-158/glycine-rich protein DOT1 [Arabidopsis thaliana]
AT5G02830	-1.02853	1.64e-11	gi|30679784|ref|NP_195903.2|/0/pentatricopeptide repeat-containing protein [Arabidopsis thaliana]
AT1G13080	-1.02925	1.06e-08	gi|15222174|ref|NP_172767.1|/0/cytochrome P450 71B2 [Arabidopsis thaliana]
AT5G14880	-1.02957	3e-12	gi|15241517|ref|NP_196992.1|/0/potassium transporter 8 [Arabidopsis thaliana]
AT2G35960	-1.03057	7.4e-14	gi|15227538|ref|NP_181140.1|/8.12872e-120/NDR1/HIN1-like 12 protein [Arabidopsis thaliana]
AT1G23205	-1.03106	1.7e-08	gi|15220674|ref|NP_173734.1|/1.42275e-113/plant invertase/pectin methylesterase inhibitor superfamily protein [Arabidopsis thaliana]
AT2G18193	-1.03512	3.08e-12	gi|30680274|ref|NP_849972.1|/0/P-loop containing nucleoside triphosphate hydrolases superfamily protein [Arabidopsis thaliana]
AT2G39200	-1.03567	4.55e-32	gi|18404979|ref|NP_565902.1|/0/protein MILDEW RESISTANCE LOCUS O 12 [Arabidopsis thaliana]
AT1G03940	-1.03868	1.02e-15	gi|15219594|ref|NP_171890.1|/0/coumaroyl-CoA:anthocyanidin 3-O-glucoside-6"-O-coumaroyltransferase 1 [Arabidopsis thaliana]
AT5G01870	-1.03922	2.75e-09	gi|15241086|ref|NP_195807.1|/4.2046e-62/pathogenesis-related lipid transfer protein [Arabidopsis thaliana]
AT4G35180	-1.04156	2.77e-08	gi|145353326|ref|NP_567977.2|/0/LYS/HIS transporter 7 [Arabidopsis thaliana]
AT5G24380	-1.04297	5.55e-34	gi|79518939|ref|NP_197826.2|/0/metal-nicotianamine transporter YSL2 [Arabidopsis thaliana]
AT5G04950	-1.04424	1.67e-33	gi|15238376|ref|NP_196114.1|/0/nicotianamine synthase 1 [Arabidopsis thaliana]
AT4G25700	-1.04479	3.21e-57	gi|15235959|ref|NP_194300.1|/7.82434e-178/beta-carotene 3-hydroxylase 1 [Arabidopsis thaliana]
AT1G65490	-1.04583	4.22e-24	gi|18408298|ref|NP_564854.1|/7.07348e-46/uncharacterized protein [Arabidopsis thaliana]
AT3G23880	-1.04729	0.00030744	gi|15229536|ref|NP_189030.1|/0/F-box/kelch-repeat protein [Arabidopsis thaliana]
AT2G15390	-1.04729	8.2e-08	gi|145362118|ref|NP_973468.2|/0/probable fucosyltransferase 4 [Arabidopsis thaliana]
AT1G10850	-1.05002	3.2e-06	gi|240254057|ref|NP_001077512.4|/0/leucine-rich repeat protein kinase-like protein [Arabidopsis thaliana]
AT3G19450	-1.05218	1.89e-65	gi|15230382|ref|NP_188576.1|/0/cinnamyl alcohol dehydrogenase 4 [Arabidopsis thaliana]
AT3G02830	-1.05331	1.09e-62	gi|18396338|ref|NP_566183.1|/0/zinc finger protein 1 [Arabidopsis thaliana]
AT3G22600	-1.05397	2.4e-07	gi|18403453|ref|NP_566712.1|/1.5797e-94/protease inhibitor/seed storage/lipid transfer protein (LTP) family protein [Arabidopsis thaliana]
AT4G23990	-1.05502	1.29e-06	gi|145343859|ref|NP_194130.3|/0/cellulose synthase-like protein G3 [Arabidopsis thaliana]
AT3G16460	-1.05646	3.95e-70	gi|15228218|ref|NP_188267.1|/0/jacalin-like lectin domain-containing protein [Arabidopsis thaliana]
AT2G26080	-1.05741	0	gi|15225249|ref|NP_180178.1|/0/glycine decarboxylase P-protein 2 [Arabidopsis thaliana]
AT5G66210	-1.05879	9.01e-205	gi|15239300|ref|NP_201422.1|/0/calcium-dependent protein kinase 28 [Arabidopsis thaliana]
AT1G51800	-1.06552	3.4e-37	gi|224589424|gb|ACN59246.1|/0/leucine-rich repeat receptor-like protein kinase [Arabidopsis thaliana]
AT3G20370	-1.06816	2.52e-08	gi|18402593|ref|NP_566660.1|/0/TRAF-like family protein [Arabidopsis thaliana]
AT5G13770	-1.07158	8.87e-38	gi|42567830|ref|NP_196881.2|/0/pentatricopeptide repeat-containing protein [Arabidopsis thaliana]
AT2G32530	-1.07562	2.21e-12	gi|30685335|ref|NP_850190.1|/0/cellulose synthase-like protein B3 [Arabidopsis thaliana]
AT4G37390	-1.07581	4.75e-14	gi|15235538|ref|NP_195455.1|/0/indole-3-acetic acid-amido synthetase GH3.2 [Arabidopsis thaliana]
AT4G13660	-1.07892	1.01e-07	gi|15236330|ref|NP_193102.1|/0/pinoresinol reductase 2 [Arabidopsis thaliana]
AT1G55910	-1.08304	0.000235377	gi|37090404|sp|Q94EG9.1|ZIP11_ARATH/0/RecName: Full=Zinc transporter 11; AltName: Full=ZRT/IRT-like protein 11; Flags: Precursor [Arabidopsis thaliana]
AT1G75280	-1.08524	7.9e-159	gi|1708420|sp|P52577.1|IFRH_ARATH/6.41558e-172/RecName: Full=Isoflavone reductase homolog P3 [Arabidopsis thaliana]
AT4G25240	-1.08574	0.000273575	gi|22328918|ref|NP_194254.2|/0/monocopper oxidase-like protein SKS1 [Arabidopsis thaliana]
AT1G33080	-1.0862	0.00090279	gi|22329916|ref|NP_174584.2|/0/MATE efflux family protein [Arabidopsis thaliana]
AT5G02260	-1.09042	0.000110823	gi|15241741|ref|NP_195846.1|/2.2179e-153/expansin A9 [Arabidopsis thaliana]
AT3G26500	-1.09155	0.000370773	gi|30688342|ref|NP_189281.2|/0/plant intracellular ras group-related LRR 2 [Arabidopsis thaliana]
AT4G35270	-1.09189	3.84e-05	gi|334187181|ref|NP_195253.4|/0/plant regulator RWP-RK family protein [Arabidopsis thaliana]
AT1G50590	-1.09432	4.49e-05	gi|15223592|ref|NP_175474.1|/0/Pirin-like protein [Arabidopsis thaliana]
AT2G28200	-1.09467	0.000430891	gi|79564965|ref|NP_180387.2|/1.10152e-159/zinc finger protein ZAT5 [Arabidopsis thaliana]
AT3G05730	-1.09563	1.11e-28	gi|15230039|ref|NP_187224.1|/1.06103e-49/defensin-like protein 205 [Arabidopsis thaliana]
AT4G30520	-1.09762	1.81e-05	gi|22329033|ref|NP_194781.2|/0/senescence-associated receptor-like kinase [Arabidopsis thaliana]
AT3G21530	-1.09796	0.000502666	gi|42565086|ref|NP_188790.2|/0/DNAse I-like superfamily protein [Arabidopsis thaliana]
AT5G54060	-1.10362	4.89e-09	gi|15239543|ref|NP_200217.1|/0/anthocyanidin 3-O-glucoside 2'''-O-xylosyltransferase [Arabidopsis thaliana]
AT3G03130	-1.10506	0.000678382	gi|15228466|ref|NP_186963.1|/0/uncharacterized protein [Arabidopsis thaliana]
AT1G30135	-1.10974	5.41e-27	gi|18397376|ref|NP_564349.1|/1.19997e-69/protein TIFY 5A [Arabidopsis thaliana]
AT5G13170	-1.11079	1.14e-28	gi|15240040|ref|NP_196821.1|/1.10435e-162/senescence-associated protein 29 [Arabidopsis thaliana]
AT4G19810	-1.11243	2.56e-07	gi|15235200|ref|NP_193716.1|/0/Class V chitinase [Arabidopsis thaliana]
AT3G09600	-1.11463	4.13e-20	gi|30680926|ref|NP_187571.2|/1.06852e-168/MYB-like transcription factor [Arabidopsis thaliana]
AT3G27170	-1.11496	1.59e-24	gi|15232105|ref|NP_189353.1|/0/chloride channel protein CLC-b [Arabidopsis thaliana]
AT5G43630	-1.1177	1.99e-15	gi|15239925|ref|NP_199176.1|/0/zinc knuckle (CCHC-type) family protein [Arabidopsis thaliana]
AT1G65060	-1.11798	8.65e-27	gi|15217838|ref|NP_176686.1|/0/4-coumarate--CoA ligase 3 [Arabidopsis thaliana]
AT2G02780	-1.11956	6.11e-05	gi|334184114|ref|NP_178381.3|/0/probable LRR receptor-like serine/threonine-protein kinase [Arabidopsis thaliana]
AT3G45610	-1.11956	0.000433952	gi|15231189|ref|NP_190147.1|/4.7779e-147/Dof zinc finger protein DOF3.2 [Arabidopsis thaliana]
AT5G01040	-1.12288	4.56e-66	gi|15240880|ref|NP_195724.1|/0/laccase 8 [Arabidopsis thaliana]
AT3G54790	-1.1251	3.58e-08	gi|30694120|ref|NP_191039.2|/0/U-box domain-containing protein 3 [Arabidopsis thaliana]
AT1G32900	-1.1252	2.13e-202	gi|15223331|ref|NP_174566.1|/0/granule-bound starch synthase 1 [Arabidopsis thaliana]
AT5G60020	-1.12582	2.56e-07	gi|15238592|ref|NP_200810.1|/0/laccase 17 [Arabidopsis thaliana]
AT5G41040	-1.13153	6.28e-06	gi|30693723|ref|NP_851111.1|/0/omega-hydroxypalmitate O-feruloyl transferase [Arabidopsis thaliana]
AT3G63370	-1.13748	0.000791204	gi|334186228|ref|NP_191896.2|/0/RNA editing factor OTP86 [Arabidopsis thaliana]
AT4G26790	-1.14159	0.000151636	gi|18416824|ref|NP_567758.1|/0/GDSL esterase/lipase [Arabidopsis thaliana]
AT5G15950	-1.14195	1.2e-18	gi|15237226|ref|NP_197099.1|/0/S-adenosylmethionine decarboxylase proenzyme 2 [Arabidopsis thaliana]
AT3G48200	-1.1441	2.42e-42	gi|18408603|ref|NP_566899.1|/0/uncharacterized protein [Arabidopsis thaliana]
AT4G37320	-1.14444	2.86e-05	gi|15235517|ref|NP_195449.1|/0/cytochrome P450, family 81, subfamily D, polypeptide 5 [Arabidopsis thaliana]
AT5G58120	-1.14766	1.28e-74	gi|15242954|ref|NP_200620.1|/0/TIR-NBS-LRR class disease resistance protein [Arabidopsis thaliana]
AT4G00820	-1.15015	4.68e-07	gi|42566208|ref|NP_567191.2|/0/protein IQ-domain 17 [Arabidopsis thaliana]
AT2G47130	-1.15198	0.000505101	gi|15226503|ref|NP_182235.1|/3.64539e-140/short-chain dehydrogenase reductase 3 [Arabidopsis thaliana]
AT3G28270	-1.15704	2.71e-30	gi|18405710|ref|NP_566836.1|/0/uncharacterized protein [Arabidopsis thaliana]
AT1G52342	-1.1602	1.02e-16	gi|116830075|gb|ABK27995.1|/8.38134e-47/unknown [Arabidopsis thaliana]
AT4G13810	-1.1646	3.04e-09	gi|15236353|ref|NP_193117.1|/0/receptor like protein 47 [Arabidopsis thaliana]
AT3G21510	-1.16809	1.16e-06	gi|451928654|pdb|4EUK|B/5.06847e-82/Chain B, Crystal Structure
AT1G15380	-1.16919	5.39e-07	gi|18394235|ref|NP_563973.1|/1.34483e-99/Lactoylglutathione lyase / glyoxalase I family protein [Arabidopsis thaliana]
AT1G17180	-1.17065	8.89e-10	gi|15220041|ref|NP_173161.1|/1.55626e-127/glutathione S-transferase TAU 25 [Arabidopsis thaliana]
AT5G48657	-1.17588	1.03e-11	gi|42573626|ref|NP_974909.1|/1.10149e-143/defense protein-like protein [Arabidopsis thaliana]
AT5G20960	-1.17861	1.83e-16	gi|30688074|ref|NP_851049.1|/0/aldehyde oxidase 1 [Arabidopsis thaliana]
AT2G21320	-1.17961	3.94e-07	gi|18399657|ref|NP_565507.1|/1.38551e-101/B-box zinc finger family protein [Arabidopsis thaliana]
AT4G23690	-1.18055	2.08e-05	gi|15236570|ref|NP_194100.1|/8.74223e-106/dirigent protein 6 [Arabidopsis thaliana]
AT5G56860	-1.18237	1.61e-12	gi|15241967|ref|NP_200497.1|/0/GATA transcription factor 21 [Arabidopsis thaliana]
AT1G64500	-1.18314	1.31e-30	gi|15217659|ref|NP_176631.1|/0/glutaredoxin-like protein [Arabidopsis thaliana]
AT2G30770	-1.18329	2.13e-07	gi|42569483|ref|NP_180635.2|/0/cytochrome P450, family 71, subfamily A, polypeptide 13 [Arabidopsis thaliana]
AT5G36925	-1.18598	2.42e-29	gi|10178210|dbj|BAB11634.1|/7.08413e-30/unnamed protein product [Arabidopsis thaliana]
AT5G47370	-1.18719	4.13e-42	gi|15238078|ref|NP_199548.1|/4.24053e-164/homeobox-leucine zipper protein HAT2 [Arabidopsis thaliana]
AT5G41740	-1.18845	1.16e-92	gi|238481459|ref|NP_001154757.1|/0/TIR-NBS-LRR class disease resistance protein [Arabidopsis thaliana]
AT5G17050	-1.18883	4.86e-21	gi|15237899|ref|NP_197207.1|/0/anthocyanidin 3-O-glucosyltransferase [Arabidopsis thaliana]
AT1G10960	-1.18934	0	gi|15220256|ref|NP_172565.1|/7.05391e-78/ferredoxin 1 [Arabidopsis thaliana]
AT1G16110	-1.19327	1.57e-07	gi|15219130|ref|NP_173062.1|/0/wall associated kinase-like 6 [Arabidopsis thaliana]
AT3G52430	-1.19452	9.64e-16	gi|15231218|ref|NP_190811.1|/0/protein PHYTOALEXIN DEFICIENT 4 [Arabidopsis thaliana]
AT3G14680	-1.19497	8.57e-10	gi|15231906|ref|NP_188086.1|/0/cytochrome P450, family 72, subfamily A, polypeptide 14 [Arabidopsis thaliana]
AT2G31110	-1.19583	0.000148313	gi|145329999|ref|NP_001077985.1|/0/protein TRICHOME BIREFRINGENCE-LIKE 40 [Arabidopsis thaliana]
AT4G22710	-1.19669	1.8e-07	gi|15235775|ref|NP_194002.1|/0/cytochrome P450, family 706, subfamily A, polypeptide 2 [Arabidopsis thaliana]
AT3G26590	-1.19844	2.81e-14	gi|15231577|ref|NP_189291.1|/0/MATE efflux family protein [Arabidopsis thaliana]
AT1G09560	-1.19923	1.73e-124	gi|15217561|ref|NP_172427.1|/2.78532e-121/germin-like protein 5 [Arabidopsis thaliana]
AT3G05400	-1.20076	4.49e-07	gi|22330860|ref|NP_187191.2|/0/sugar transporter ERD6-like 12 [Arabidopsis thaliana]
AT1G71400	-1.20202	2.07e-06	gi|42563138|ref|NP_177296.2|/0/CLAVATA2 -related protein [Arabidopsis thaliana]
AT5G09460	-1.21148	2.08e-09	gi|15242422|ref|NP_196508.1|/0/transcription factor bHLH143 [Arabidopsis thaliana]
AT2G18690	-1.21549	2.09e-18	gi|18398818|ref|NP_028490.1|/6.60613e-175/uncharacterized protein [Arabidopsis thaliana]
AT4G00050	-1.21714	2.53e-49	gi|30678541|ref|NP_191916.3|/0/transcription factor UNE10 [Arabidopsis thaliana]
AT1G15260	-1.21717	6.92e-06	gi|18394218|ref|NP_563968.1|/1.84355e-99/uncharacterized protein [Arabidopsis thaliana]
AT1G15040	-1.21788	9.37e-12	gi|30684146|ref|NP_850943.1|/0/putative glutamine amidotransferase [Arabidopsis thaliana]
AT2G43140	-1.23059	0.000307873	gi|334184893|ref|NP_001189738.1|/0/transcription factor bHLH129 [Arabidopsis thaliana]
AT3G54220	-1.2329	3.49e-13	gi|15232451|ref|NP_190990.1|/0/protein SCARECROW [Arabidopsis thaliana]
AT5G10580	-1.2371	2.35e-16	gi|15238200|ref|NP_196620.1|/3.34389e-140/uncharacterized protein [Arabidopsis thaliana]
AT2G37130	-1.23801	1.88e-12	gi|15228090|ref|NP_181250.1|/0/peroxidase [Arabidopsis thaliana]
AT4G18220	-1.23841	3.11e-06	gi|15236799|ref|NP_193556.1|/0/putative purine permease 9 [Arabidopsis thaliana]
AT2G28780	-1.23863	1.43e-22	gi|30684006|ref|NP_180444.2|/0/uncharacterized protein [Arabidopsis thaliana]
AT1G10340	-1.23936	1.24e-05	gi|18391143|ref|NP_563867.1|/0/ankyrin repeat-containing protein [Arabidopsis thaliana]
AT1G66100	-1.24395	7.6e-52	gi|15218931|ref|NP_176784.1|/6.95514e-73/probable thionin-2.4 [Arabidopsis thaliana]
AT1G12080	-1.24609	2.63e-07	gi|30682601|ref|NP_849650.1|/1.02468e-68/vacuolar calcium-binding protein-like protein [Arabidopsis thaliana]
AT1G16130	-1.24653	6.54e-10	gi|15219134|ref|NP_173064.1|/0/wall-associated receptor kinase-like 2 [Arabidopsis thaliana]
AT3G52450	-1.24939	4.01e-50	gi|15231222|ref|NP_190813.1|/0/E3 ubiquitin-protein ligase PUB22 [Arabidopsis thaliana]
AT4G10120	-1.2515	2.92e-129	gi|42566384|ref|NP_192750.2|/0/probable sucrose-phosphate synthase 4 [Arabidopsis thaliana]
AT3G61210	-1.25491	7.7e-20	gi|15233061|ref|NP_191680.1|/1.15164e-149/S-adenosyl-L-methionine-dependent methyltransferases superfamily protein [Arabidopsis thaliana]
AT4G16370	-1.25523	5.54e-142	gi|240255930|ref|NP_567493.5|/0/oligopeptide transporter [Arabidopsis thaliana]
AT1G31290	-1.25706	3.53e-05	gi|15221662|ref|NP_174414.1|/0/argonaute 3 [Arabidopsis thaliana]
AT1G69050	-1.26524	0.000995058	gi|18409185|ref|NP_564950.1|/3.33906e-51/uncharacterized protein [Arabidopsis thaliana]
AT1G51270	-1.26622	4.67e-07	gi|238478822|ref|NP_001154418.1|/0/vesicle-associated protein 1-4 [Arabidopsis thaliana]
AT5G24150	-1.27065	1.91e-77	gi|15237902|ref|NP_197803.1|/0/Squalene monooxygenase 5 [Arabidopsis thaliana]
AT3G20830	-1.27095	1e-06	gi|15232374|ref|NP_188719.1|/0/AGC (cAMP-dependent, cGMP-dependent and protein kinase C) kinase family protein [Arabidopsis thaliana]
AT5G04150	-1.27095	1e-06	gi|15237636|ref|NP_196035.1|/5.43589e-132/transcription factor bHLH101 [Arabidopsis thaliana]
AT2G47550	-1.27517	6.25e-22	gi|18407388|ref|NP_566103.1|/0/probable pectinesterase/pectinesterase inhibitor 20 [Arabidopsis thaliana]
AT3G46700	-1.2795	0.000185358	gi|79436758|ref|NP_190254.2|/0/UDP-glycosyltransferase 76E3 [Arabidopsis thaliana]
AT4G37400	-1.28167	1.99e-10	gi|18420031|ref|NP_568025.1|/0/cytochrome P450, family 81, subfamily F, polypeptide 3 [Arabidopsis thaliana]
AT1G11670	-1.2824	2.69e-66	gi|15221073|ref|NP_172632.1|/0/MATE efflux family protein [Arabidopsis thaliana]
AT1G14870	-1.28675	2.2e-43	gi|15223920|ref|NP_172940.1|/1.81474e-92/cadmium resistance protein 2 [Arabidopsis thaliana]
AT5G58350	-1.29202	4.14e-47	gi|75264276|sp|Q9LVL5.1|WNK4_ARATH/0/RecName: Full=Probable serine/threonine-protein kinase WNK4; Short=AtWNK4; AltName: Full=Protein kinase with no lysine 4 [Arabidopsis thaliana]
AT1G65486	-1.2961	1.88e-24	gi|186493227|ref|NP_001117551.1|/4.5849e-45/uncharacterized protein [Arabidopsis thaliana]
AT2G30130	-1.29687	6.09e-06	gi|18402268|ref|NP_565695.1|/4.88062e-110/LOB domain-containing protein 12 [Arabidopsis thaliana]
AT1G65845	-1.29876	4.18e-09	gi|30697256|ref|NP_849846.1|/1.71826e-55/uncharacterized protein [Arabidopsis thaliana]
AT5G19240	-1.30243	0	gi|15239686|ref|NP_197425.1|/1.78556e-110/GPI-anchored glycoprotein membrane precursor [Arabidopsis thaliana]
AT3G12500	-1.30266	1.09e-15	gi|334185286|ref|NP_566426.2|/0/basic chitinase B [Arabidopsis thaliana]
AT3G44320	-1.30723	1.15e-43	gi|15229936|ref|NP_190018.1|/0/nitrilase 3 [Arabidopsis thaliana]
AT1G12010	-1.31151	4.34e-06	gi|15221170|ref|NP_172665.1|/0/1-aminocyclopropane-1-carboxylate oxidase [Arabidopsis thaliana]
AT4G25020	-1.31151	0.00028158	gi|18416469|ref|NP_567715.1|/0/D111/G-patch domain-containing protein [Arabidopsis thaliana]
AT2G35930	-1.32296	3.42e-155	gi|30686609|ref|NP_181137.2|/0/E3 ubiquitin-protein ligase PUB23 [Arabidopsis thaliana]
AT4G26850	-1.33186	2.81e-123	gi|18416877|ref|NP_567759.1|/0/GDP-L-galactose phosphorylase 1 [Arabidopsis thaliana]
AT3G15510	-1.33213	1.9e-06	gi|15232606|ref|NP_188170.1|/0/NAC domain containing protein 2 [Arabidopsis thaliana]
AT1G73620	-1.33213	1.9e-06	gi|15219508|ref|NP_177503.1|/1.5337e-157/pathogenesis-related thaumatin-like protein [Arabidopsis thaliana]
AT1G02820	-1.33529	2.83e-14	gi|15218614|ref|NP_171781.1|/3.9905e-44/late embryogenesis abundant 3-like protein [Arabidopsis thaliana]
AT3G15354	-1.33646	3.95e-21	gi|22331100|ref|NP_683567.1|/0/protein SPA1-related 3 [Arabidopsis thaliana]
AT5G17330	-1.33818	1.22e-65	gi|15237949|ref|NP_197235.1|/0/glutamate decarboxylase 1 [Arabidopsis thaliana]
AT5G19470	-1.33848	2.93e-33	gi|30687333|ref|NP_197448.2|/0/nudix hydrolase 24 [Arabidopsis thaliana]
AT2G42760	-1.33868	2.21e-81	gi|15227995|ref|NP_181804.1|/1.32946e-148/uncharacterized protein [Arabidopsis thaliana]
AT1G71870	-1.34102	0.00067981	gi|15217599|ref|NP_177332.1|/0/MATE efflux family protein [Arabidopsis thaliana]
AT4G00970	-1.34607	1.38e-09	gi|42566214|ref|NP_567204.3|/0/cysteine-rich receptor-like protein kinase 41 [Arabidopsis thaliana]
AT4G24340	-1.35321	2.58e-05	gi|18416327|ref|NP_567699.1|/0/phosphorylase family protein [Arabidopsis thaliana]
AT2G21185	-1.35458	0.000142822	gi|18399616|ref|NP_565500.1|/6.31685e-50/uncharacterized protein [Arabidopsis thaliana]
AT3G62040	-1.35687	2.78e-46	gi|79456826|ref|NP_191763.3|/8.15473e-142/haloacid dehalogenase-like hydrolase superfamily protein [Arabidopsis thaliana]
AT2G34150	-1.3575	4.78e-05	gi|79324228|ref|NP_001031474.1|/0/protein SCAR1 [Arabidopsis thaliana]
AT5G48010	-1.35988	1.6e-05	gi|145334775|ref|NP_001078733.1|/0/thalianol synthase 1 [Arabidopsis thaliana]
AT5G07990	-1.36164	9.7e-25	gi|15241483|ref|NP_196416.1|/0/Flavonoid 3'-monooxygenase [Arabidopsis thaliana]
AT5G46490	-1.36499	1.9e-21	gi|42573596|ref|NP_974894.1|/0/TIR-NBS-LRR class disease resistance protein [Arabidopsis thaliana]
AT1G70250	-1.36504	4.85e-15	gi|42563102|ref|NP_177182.2|/0/protease inhibitor/seed storage/LTP family protein [Arabidopsis thaliana]
AT2G39510	-1.36731	1.57e-13	gi|15225480|ref|NP_181483.1|/0/nodulin MtN21-like transporter family protein [Arabidopsis thaliana]
AT1G35710	-1.37213	6.77e-28	gi|75175345|sp|Q9LP24.1|Y1571_ARATH/0/RecName: Full=Probable leucine-rich repeat receptor-like protein kinase At1g35710; Flags: Precursor [Arabidopsis thaliana]
AT4G23550	-1.37473	1.73e-11	gi|29839684|sp|Q9SUS1.1|WRK29_ARATH/2.71736e-175/RecName: Full=Probable WRKY transcription factor 29; AltName: Full=WRKY DNA-binding protein 29 [Arabidopsis thaliana]
AT1G55960	-1.37986	1.4e-117	gi|18405618|ref|NP_564705.1|/0/putative polyketide cyclase/dehydrase and lipid transport-like protein [Arabidopsis thaliana]
AT5G23730	-1.3826	6.93e-06	gi|79518327|ref|NP_568435.2|/0/WD repeat-containing protein RUP2 [Arabidopsis thaliana]
AT1G05260	-1.38464	9.41e-15	gi|15220463|ref|NP_172018.1|/0/peroxidase 3 [Arabidopsis thaliana]
AT2G31880	-1.38526	1.09e-297	gi|15225153|ref|NP_180747.1|/0/leucine-rich repeat receptor-like serine/threonine/tyrosine-protein kinase SOBIR1 [Arabidopsis thaliana]
AT4G23180	-1.39975	8.33e-198	gi|30686087|ref|NP_567679.2|/0/cysteine-rich receptor-like protein kinase 10 [Arabidopsis thaliana]
AT5G47990	-1.40052	0.000627466	gi|15238866|ref|NP_199610.1|/0/cytochrome P450 705A5 [Arabidopsis thaliana]
AT2G39518	-1.40813	1.25e-07	gi|145330695|ref|NP_001078023.1|/8.73718e-91/uncharacterized protein [Arabidopsis thaliana]
AT1G58410	-1.40813	0.000389109	gi|29839610|sp|Q9C646.1|RX24L_ARATH/0/RecName: Full=Probable disease resistance protein RXW24L [Arabidopsis thaliana]
AT3G16660	-1.40875	2.72e-21	gi|30684182|ref|NP_188288.2|/2.18079e-95/pollen Ole e 1 allergen and extensin family protein [Arabidopsis thaliana]
AT2G41800	-1.41117	5.18e-09	gi|15227437|ref|NP_181711.1|/0/uncharacterized protein [Arabidopsis thaliana]
AT1G66280	-1.4128	1.23e-22	gi|15219623|ref|NP_176802.1|/0/beta-glucosidase 22 [Arabidopsis thaliana]
AT2G04170	-1.42275	6.27e-06	gi|42568925|ref|NP_178502.2|/0/TRAF-like family protein [Arabidopsis thaliana]
AT2G07680	-1.42362	4.92e-14	gi|334184186|ref|NP_178811.7|/0/multidrug resistance-associated protein 11 [Arabidopsis thaliana]
AT4G34550	-1.42699	0.000441282	gi|15236147|ref|NP_195181.1|/1.02849e-162/uncharacterized protein [Arabidopsis thaliana]
AT3G08860	-1.42824	3.03e-37	gi|15231974|ref|NP_187498.1|/0/PYRIMIDINE 4 [Arabidopsis thaliana]
AT2G46830	-1.433	2.95e-139	gi|30690518|ref|NP_850460.1|/0/protein CCA1 [Arabidopsis thaliana]
AT4G00910	-1.45299	0.000309287	gi|30678769|ref|NP_567199.2|/0/aluminum activated malate transporter family protein [Arabidopsis thaliana]
AT4G38560	-1.45788	0.000190584	gi|145334263|ref|NP_001078512.1|/0/phospholipase like protein (PEARLI 4) [Arabidopsis thaliana]
AT1G61560	-1.45788	2.92e-08	gi|15220529|ref|NP_176350.1|/0/MLO-like protein 6 [Arabidopsis thaliana]
AT1G30530	-1.46045	1.95e-23	gi|18397552|ref|NP_564357.1|/0/UDP-glucosyl transferase 78D1 [Arabidopsis thaliana]
AT3G44550	-1.46232	1.13e-06	gi|145339118|ref|NP_190041.2|/0/fatty acyl-CoA reductase 5 [Arabidopsis thaliana]
AT4G01080	-1.46776	2.75e-21	gi|15234058|ref|NP_192017.1|/0/protein TRICHOME BIREFRINGENCE-LIKE 26 [Arabidopsis thaliana]
AT3G16670	-1.46945	3.82e-53	gi|15228282|ref|NP_188289.1|/2.51546e-81/pollen Ole e 1 allergen and extensin family protein [Arabidopsis thaliana]
AT2G43570	-1.47006	0.00056401	gi|2281113|gb|AAB64049.1|/1.5134e-166/endochitinase isolog [Arabidopsis thaliana]
AT3G29590	-1.47235	1.61e-07	gi|15230013|ref|NP_189600.1|/0/malonyl-CoA:anthocyanidin 5-O-glucoside-6"-O-malonyltransferase [Arabidopsis thaliana]
AT3G22550	-1.4889	5.32e-17	gi|22331260|ref|NP_188894.2|/2.76567e-154/uncharacterized protein [Arabidopsis thaliana]
AT3G46280	-1.49525	3.63e-39	gi|30692700|ref|NP_190213.2|/0/protein kinase-like protein [Arabidopsis thaliana]
AT1G33610	-1.51255	3.84e-25	gi|334183006|ref|NP_174625.3|/0/leucine-rich repeat (LRR) family protein [Arabidopsis thaliana]
AT1G29500	-1.51505	7.95e-06	gi|15218951|ref|NP_174243.1|/8.47217e-71/protein SMALL AUXIN UPREGULATED 66 [Arabidopsis thaliana]
AT3G23430	-1.52277	6.96e-51	gi|22331284|ref|NP_188985.2|/0/phosphate transporter PHO1 [Arabidopsis thaliana]
AT1G15210	-1.52445	3.78e-36	gi|15218084|ref|NP_172973.1|/0/ABC transporter G family member 35 [Arabidopsis thaliana]
AT1G24148	-1.52827	8.23e-09	gi|334182810|ref|NP_001185077.1|/6.50837e-63/uncharacterized protein [Arabidopsis thaliana]
AT1G23730	-1.53555	1.85e-12	gi|15220853|ref|NP_173785.1|/1.17876e-146/beta carbonic anhydrase 3 [Arabidopsis thaliana]
AT4G22880	-1.53801	8.83e-71	gi|15235853|ref|NP_194019.1|/0/leucoanthocyanidin dioxygenase [Arabidopsis thaliana]
AT1G35910	-1.55252	0.000186352	gi|18399940|ref|NP_564464.1|/0/probable trehalose-phosphate phosphatase D [Arabidopsis thaliana]
AT2G26695	-1.55252	4.49e-11	gi|79602205|ref|NP_973537.2|/2.42763e-86/Ran BP2/NZF zinc finger-like protein [Arabidopsis thaliana]
AT1G24145	-1.57761	1.41e-17	gi|2829866|gb|AAC00574.1|/2.70128e-69/Hypothetical protein [Arabidopsis thaliana]
AT1G69930	-1.57974	2.82e-16	gi|15222499|ref|NP_177151.1|/5.04579e-135/glutathione S-transferase TAU 11 [Arabidopsis thaliana]
AT3G23180	-1.58647	0.000884031	gi|186510342|ref|NP_188959.3|/1.88913e-122/HR-like lesion-inducing protein-like protein [Arabidopsis thaliana]
AT4G37520	-1.58859	1.2e-36	gi|15235597|ref|NP_195468.1|/0/peroxidase 50 [Arabidopsis thaliana]
AT2G27420	-1.60191	3.82e-16	gi|18401420|ref|NP_565649.1|/0/cysteine proteinase-like protein [Arabidopsis thaliana]
AT5G28630	-1.61141	1.79e-19	gi|15241873|ref|NP_198215.1|/1.05163e-81/glycine-rich protein [Arabidopsis thaliana]
AT3G04720	-1.61405	5.86e-37	gi|15229342|ref|NP_187123.1|/2.18269e-128/pathogenesis-related 4 [Arabidopsis thaliana]
AT5G25830	-1.61737	1.8e-07	gi|15239503|ref|NP_197955.1|/0/GATA transcription factor 12 [Arabidopsis thaliana]
AT3G01260	-1.61964	0.000604559	gi|240254708|ref|NP_186775.4|/0/aldose 1-epimerase-like prtotein [Arabidopsis thaliana]
AT4G29690	-1.62123	2.23e-10	gi|15233662|ref|NP_194698.1|/0/alkaline-phosphatase-like protein [Arabidopsis thaliana]
AT5G06930	-1.63382	3.4e-06	gi|145357725|ref|NP_196310.2|/0/uncharacterized protein [Arabidopsis thaliana]
AT5G10760	-1.63998	0.000155344	gi|15238250|ref|NP_196637.1|/0/aspartyl protease family protein [Arabidopsis thaliana]
AT5G26220	-1.64133	6.08e-11	gi|15239626|ref|NP_197994.1|/2.60831e-124/ChaC-like family protein [Arabidopsis thaliana]
AT5G13930	-1.64579	0	gi|15240753|ref|NP_196897.1|/0/chalcone synthase [Arabidopsis thaliana]
AT3G58810	-1.65037	2.42e-05	gi|42566037|ref|NP_191440.2|/0/metal tolerance protein A2 [Arabidopsis thaliana]
AT3G24460	-1.65153	6.76e-16	gi|42565162|ref|NP_189089.3|/0/Serinc-domain containing serine and sphingolipid biosynthesis protein [Arabidopsis thaliana]
AT4G17800	-1.65406	1.25e-08	gi|17933299|gb|AAL48232.1|AF446359_1/6.45933e-171/AT4g17800/dl4935c [Arabidopsis thaliana]
AT3G56980	-1.65425	5.14e-19	gi|15230178|ref|NP_191257.1|/1.10329e-144/transcription factor ORG3 [Arabidopsis thaliana]
AT1G26960	-1.668	1e-05	gi|18396130|ref|NP_564268.1|/1.36125e-147/homeobox-leucine zipper protein ATHB-23 [Arabidopsis thaliana]
AT3G56970	-1.668	1.47e-30	gi|15230177|ref|NP_191256.1|/1.4355e-141/transcription factor ORG2 [Arabidopsis thaliana]
AT2G01430	-1.68377	0.000276761	gi|30677923|ref|NP_178252.2|/9.70296e-158/homeobox-leucine zipper protein ATHB-17 [Arabidopsis thaliana]
AT1G30700	-1.68377	4.41e-19	gi|15221473|ref|NP_174357.1|/0/FAD-binding Berberine family protein [Arabidopsis thaliana]
AT5G48430	-1.68745	4.32e-05	gi|15238970|ref|NP_199654.1|/0/aspartyl protease family protein [Arabidopsis thaliana]
AT4G20110	-1.69454	2.44e-08	gi|334186721|ref|NP_001190777.1|/0/vacuolar-sorting receptor 7 [Arabidopsis thaliana]
AT1G32450	-1.69983	3.2e-118	gi|30692706|ref|NP_174523.2|/0/nitrate transporter 1.5 [Arabidopsis thaliana]
AT5G02780	-1.70452	0.000726953	gi|30679765|ref|NP_195898.2|/1.36373e-135/glutathione transferase lambda 1 [Arabidopsis thaliana]
AT1G73870	-1.70717	1.71e-30	gi|15219574|ref|NP_177528.1|/0/zinc finger protein CONSTANS-LIKE 7 [Arabidopsis thaliana]
AT3G07195	-1.70762	1.72e-77	gi|22330901|ref|NP_683537.1|/2.08131e-135/RPM1-interacting protein 4 (RIN4) family protein [Arabidopsis thaliana]
AT3G22275	-1.71078	6.8e-07	gi|145332669|ref|NP_001078200.1|/7.6915e-64/uncharacterized protein [Arabidopsis thaliana]
AT4G32650	-1.71078	3.24e-13	gi|15233870|ref|NP_194991.1|/0/potassium channel KAT3 [Arabidopsis thaliana]
AT5G45380	-1.72245	4.7e-05	gi|334188207|ref|NP_199351.2|/0/urea-proton symporter DUR3 [Arabidopsis thaliana]
AT2G22810	-1.72245	4.69e-05	gi|15227755|ref|NP_179866.1|/0/1-aminocyclopropane-1-carboxylate synthase [Arabidopsis thaliana]
AT3G26210	-1.72245	2.77e-07	gi|15231526|ref|NP_189252.1|/0/cytochrome P450 71B23 [Arabidopsis thaliana]
AT5G26280	-1.72923	8.53e-32	gi|18421009|ref|NP_568484.1|/0/TRAF-like family protein [Arabidopsis thaliana]
AT1G78000	-1.7294	1.13e-26	gi|18411776|ref|NP_565166.1|/0/sulfate transporter 1;2 [Arabidopsis thaliana]
AT2G30760	-1.73149	1.3e-15	gi|15224569|ref|NP_180634.1|/1.56074e-48/uncharacterized protein [Arabidopsis thaliana]
AT1G65690	-1.73309	4.35e-09	gi|18408342|ref|NP_564862.1|/4.00476e-144/late embryogenesis abundant (LEA) hydroxyproline-rich glycoprotein [Arabidopsis thaliana]
AT4G08040	-1.73309	7.63e-05	gi|18413071|ref|NP_567330.1|/0/1-aminocyclopropane-1-carboxylate synthase 11 [Arabidopsis thaliana]
AT1G68870	-1.75897	0.00020047	gi|15221552|ref|NP_177053.1|/1.62841e-82/SOB five-like 2 protein [Arabidopsis thaliana]
AT3G51240	-1.7593	1.27e-87	gi|15230433|ref|NP_190692.1|/0/flavanone 3-hydroxylase [Arabidopsis thaliana]
AT1G65870	-1.76592	1.97e-07	gi|15218836|ref|NP_176762.1|/1.87728e-103/dirigent protein 21 [Arabidopsis thaliana]
AT3G15300	-1.77491	5.16e-06	gi|15232547|ref|NP_188148.1|/9.25074e-125/VQ motif-containing protein [Arabidopsis thaliana]
AT1G36180	-1.78155	5.02e-10	gi|334183052|ref|NP_174850.4|/0/acetyl-CoA carboxylase 2 [Arabidopsis thaliana]
AT3G28345	-1.78348	2.76e-15	gi|15229473|ref|NP_189475.1|/0/ABC transporter B family member 15 [Arabidopsis thaliana]
AT3G09940	-1.78541	6.63e-43	gi|18398691|ref|NP_566361.1|/0/monodehydroascorbate reductase (NADH) [Arabidopsis thaliana]
AT1G70170	-1.79353	0.000524094	gi|15223067|ref|NP_177174.1|/0/matrix metalloproteinase [Arabidopsis thaliana]
AT1G47400	-1.80155	8.58e-08	gi|42562583|ref|NP_175173.2|/1.64089e-21/uncharacterized protein [Arabidopsis thaliana]
AT1G67330	-1.81798	3.46e-11	gi|15220402|ref|NP_176901.1|/1.02504e-168/uncharacterized protein [Arabidopsis thaliana]
AT1G51820	-1.8188	6.48e-97	gi|264664529|sp|C0LGG3.1|Y5182_ARATH/0/RecName: Full=Probable LRR receptor-like serine/threonine-protein kinase At1g51820; Flags: Precursor [Arabidopsis thaliana]
AT4G14090	-1.83045	1.53e-30	gi|15236407|ref|NP_193146.1|/0/anthocyanin 5-O-glucosyltransferase [Arabidopsis thaliana]
AT2G19970	-1.83429	3.59e-06	gi|111074156|gb|ABH04451.1|/6.0191e-103/At2g19970 [Arabidopsis thaliana]
AT1G18980	-1.86938	3.81e-07	gi|15221902|ref|NP_173332.1|/5.67009e-122/germin-like protein subfamily T member 2 [Arabidopsis thaliana]
AT3G47090	-1.87445	3.77e-06	gi|15232726|ref|NP_190293.1|/0/leucine-rich repeat protein kinase-like protein [Arabidopsis thaliana]
AT1G47395	-1.88642	6.35e-12	gi|30694069|ref|NP_849780.1|/2.14307e-21/uncharacterized protein [Arabidopsis thaliana]
AT2G44790	-1.8906	3.44e-28	gi|15224960|ref|NP_182006.1|/8.59329e-116/uclacyanin 2 [Arabidopsis thaliana]
AT1G15890	-1.89356	0.000365169	gi|15218365|ref|NP_173041.1|/0/CC-NBS-LRR class disease resistance protein [Arabidopsis thaliana]
AT2G25160	-1.89356	0.000365059	gi|15224686|ref|NP_180088.1|/0/cytochrome P450, family 82, subfamily F, polypeptide 1 [Arabidopsis thaliana]
AT1G09240	-1.89717	4.02e-08	gi|15217462|ref|NP_172395.1|/0/nicotianamine synthase 3 [Arabidopsis thaliana]
AT5G44160	-1.90246	9.83e-07	gi|15241426|ref|NP_199229.1|/0/zinc finger protein NUTCRACKER [Arabidopsis thaliana]
AT3G18710	-1.90616	1.04e-13	gi|15230166|ref|NP_188501.1|/0/U-box domain-containing protein 29 [Arabidopsis thaliana]
AT1G54000	-1.90866	1.13e-46	gi|15221019|ref|NP_175802.1|/0/GDSL esterase/lipase [Arabidopsis thaliana]
AT1G02360	-1.90946	1.61e-07	gi|46931226|gb|AAT06417.1|/1.5146e-163/At1g02360 [Arabidopsis thaliana]
AT1G30720	-1.91185	6.03e-25	gi|15221492|ref|NP_174359.1|/0/FAD-binding Berberine family protein [Arabidopsis thaliana]
AT3G26470	-1.92175	1.68e-15	gi|18404952|ref|NP_566794.1|/3.35804e-122/RPW8 domain-containing powdery mildew resistance protein [Arabidopsis thaliana]
AT1G01580	-1.92598	4.16e-17	gi|15223434|ref|NP_171664.1|/0/ferric reduction oxidase 2 [Arabidopsis thaliana]
AT2G27660	-1.92692	3.82e-31	gi|15226210|ref|NP_180334.1|/0/cysteine/histidine-rich C1 domain-containing protein [Arabidopsis thaliana]
AT1G65610	-1.92908	1.03e-07	gi|15218745|ref|NP_176738.1|/0/glycosyl hydrolase 9A2 [Arabidopsis thaliana]
AT3G14280	-1.93103	0.000238302	gi|15231822|ref|NP_188045.1|/3.47602e-77/uncharacterized protein [Arabidopsis thaliana]
AT1G50180	-1.93439	9.63e-05	gi|15222893|ref|NP_175437.1|/0/NB-ARC domain-containing disease resistance protein [Arabidopsis thaliana]
AT5G66740	-1.93954	1.58e-05	gi|240256491|ref|NP_201475.4|/0/uncharacterized protein [Arabidopsis thaliana]
AT5G67450	-1.94156	6.31e-06	gi|15240742|ref|NP_201546.1|/1.34647e-141/zinc-finger protein 1 [Arabidopsis thaliana]
AT1G29280	-1.94331	4.34e-12	gi|20978789|sp|Q9LP56.1|WRK65_ARATH/1.21233e-151/RecName: Full=Probable WRKY transcription factor 65; AltName: Full=WRKY DNA-binding protein 65 [Arabidopsis thaliana]
AT3G51330	-1.94941	2.68e-08	gi|18409320|ref|NP_566948.1|/0/aspartyl protease family protein [Arabidopsis thaliana]
AT4G21850	-1.96195	6.39e-129	gi|18415777|ref|NP_567638.1|/5.31537e-81/methionine sulfoxide reductase B9 [Arabidopsis thaliana]
AT5G63660	-1.96756	0.000923754	gi|15242860|ref|NP_201171.1|/5.84095e-40/defensin-like protein 6 [Arabidopsis thaliana]
AT5G22890	-1.96756	0.0009235	gi|30688719|ref|NP_197680.2|/0/zinc finger-like protein [Arabidopsis thaliana]
AT3G15240	-1.96756	7.07e-13	gi|145332403|ref|NP_001078158.1|/0/serine/threonine-protein kinase WNK (With No Lysine)-related protein [Arabidopsis thaliana]
AT1G80240	-1.96756	6.96e-17	gi|15220093|ref|NP_178141.1|/0/uncharacterized protein [Arabidopsis thaliana]
AT2G45430	-1.96756	1.01e-05	gi|15225475|ref|NP_182067.1|/0/AT-hook motif nuclear-localized protein 22 [Arabidopsis thaliana]
AT2G34020	-1.96756	0.000379096	gi|79567618|ref|NP_180949.2|/0/calcium-binding EF-hand-containing protein [Arabidopsis thaliana]
AT5G14330	-1.96756	0.000923247	gi|15241375|ref|NP_196937.1|/4.60768e-69/uncharacterized protein [Arabidopsis thaliana]
AT5G65690	-1.99731	1.62e-05	gi|22328084|ref|NP_680468.1|/0/phosphoenolpyruvate carboxykinase 2 [Arabidopsis thaliana]
AT3G46130	-2.00709	0.000244939	gi|15231343|ref|NP_190199.1|/1.41614e-152/transcription factor MYB48 [Arabidopsis thaliana]
AT3G23510	-2.01592	7.09e-10	gi|30687094|ref|NP_188993.2|/0/cyclopropane-fatty-acyl-phospholipid synthase [Arabidopsis thaliana]
AT1G69810	-2.01818	1.76e-09	gi|18409374|ref|NP_564976.1|/0/WRKY DNA-binding protein 36 [Arabidopsis thaliana]
AT3G26440	-2.04848	2.62e-06	gi|18404941|ref|NP_566793.1|/0/uncharacterized protein [Arabidopsis thaliana]
AT5G49620	-2.05502	0.000386613	gi|334188285|ref|NP_001190502.1|/0/myb domain protein 78 [Arabidopsis thaliana]
AT3G58070	-2.05502	0.00038673	gi|75328211|sp|Q84WI0.1|GIS_ARATH/1.09658e-149/RecName: Full=Zinc finger protein GIS; AltName: Full=Protein GLABROUS INFLORESCENCE STEMS [Arabidopsis thaliana]
AT3G28540	-2.06067	2.68e-07	gi|15233016|ref|NP_189495.1|/0/AAA-type ATPase family protein [Arabidopsis thaliana]
AT4G35380	-2.08304	1.7e-07	gi|42567412|ref|NP_195264.2|/0/SEC7-like guanine nucleotide exchange family protein [Arabidopsis thaliana]
AT3G14940	-2.08753	3.5e-105	gi|15232442|ref|NP_188112.1|/0/phosphoenolpyruvate carboxylase 3 [Arabidopsis thaliana]
AT1G13609	-2.08785	2.84e-11	gi|79317933|ref|NP_001031041.1|/1.7394e-39/defensin-like protein 287 [Arabidopsis thaliana]
AT2G25980	-2.09018	4.49e-15	gi|15225232|ref|NP_180168.1|/0/myrosinase-binding protein-like protein [Arabidopsis thaliana]
AT5G50760	-2.09684	0.000247187	gi|15241259|ref|NP_199889.1|/7.58155e-107/SAUR-like auxin-responsive protein [Arabidopsis thaliana]
AT5G44380	-2.10249	6.59e-25	gi|15241476|ref|NP_199251.1|/0/FAD-binding and BBE domain-containing protein [Arabidopsis thaliana]
AT1G65500	-2.10506	2.55e-05	gi|18408300|ref|NP_564855.1|/1.3422e-44/uncharacterized protein [Arabidopsis thaliana]
AT5G48110	-2.10506	2.55e-05	gi|15238897|ref|NP_199622.1|/0/terpenoid synthase 20 [Arabidopsis thaliana]
AT2G27000	-2.1144	0.000606414	gi|15225832|ref|NP_180268.1|/0/cytochrome P450, family 705, subfamily A, polypeptide 8 [Arabidopsis thaliana]
AT2G14960	-2.11595	4.4e-15	gi|62900130|sp|O82333.1|GH31_ARATH/0/RecName: Full=Probable indole-3-acetic acid-amido synthetase GH3.1; AltName: Full=Auxin-responsive GH3-like protein 1; Short=AtGH3-1 [Arabidopsis thaliana]
AT1G02520	-2.12599	2.76e-14	gi|15217785|ref|NP_171753.1|/0/P-glycoprotein 11 [Arabidopsis thaliana]
AT1G61590	-2.13748	0.000156378	gi|17381261|gb|AAL36049.1|/0/At1g61590/T25B24_6 [Arabidopsis thaliana]
AT4G15248	-2.1451	4.34e-11	gi|79325121|ref|NP_001031645.1|/2.80438e-66/B-box type zinc finger-containing protein [Arabidopsis thaliana]
AT4G13420	-2.15198	4.08e-06	gi|18414004|ref|NP_567404.1|/0/potassium transporter 5 [Arabidopsis thaliana]
AT1G51790	-2.1587	6.66e-16	gi|186490223|ref|NP_175590.3|/0/leucine-rich repeat protein kinase-like protein [Arabidopsis thaliana]
AT1G73120	-2.1602	2.7e-11	gi|15219378|ref|NP_177455.1|/1.63375e-58/uncharacterized protein [Arabidopsis thaliana]
AT3G19390	-2.17065	5.82e-23	gi|18402225|ref|NP_566633.1|/0/Granulin repeat cysteine protease family protein [Arabidopsis thaliana]
AT1G08430	-2.17701	2.49e-17	gi|15223208|ref|NP_172319.1|/0/aluminum-activated malate transporter 1 [Arabidopsis thaliana]
AT4G16260	-2.18995	7.25e-36	gi|17381238|gb|AAL36038.1|/0/AT4g16260/dl4170c [Arabidopsis thaliana]
AT5G64810	-2.21041	1.02e-08	gi|29839597|sp|Q93WU9.1|WRK51_ARATH/3.42624e-111/RecName: Full=Probable WRKY transcription factor 51; AltName: Full=WRKY DNA-binding protein 51 [Arabidopsis thaliana]
AT2G41240	-2.2131	1.7e-88	gi|15227308|ref|NP_181657.1|/8.24377e-136/transcription factor bHLH100 [Arabidopsis thaliana]
AT5G13080	-2.21549	4e-07	gi|29839630|sp|Q9FYA2.1|WRK75_ARATH/6.89183e-81/RecName: Full=Probable WRKY transcription factor 75; AltName: Full=WRKY DNA-binding protein 75 [Arabidopsis thaliana]
AT4G11290	-2.2239	1.6e-10	gi|15237128|ref|NP_192868.1|/0/peroxidase 39 [Arabidopsis thaliana]
AT4G36700	-2.23167	4.23e-32	gi|30690736|ref|NP_195388.2|/0/cupin family protein [Arabidopsis thaliana]
AT2G29350	-2.23765	3.99e-10	gi|15227075|ref|NP_180496.1|/2.22224e-151/senescence-associated protein 13 [Arabidopsis thaliana]
AT4G15340	-2.24767	0.000152486	gi|18414430|ref|NP_567462.1|/0/pentacyclic triterpene synthase 1 [Arabidopsis thaliana]
AT3G14260	-2.24767	0.000152437	gi|79401315|ref|NP_188043.2|/3.26256e-131/LURP-one-related 11 protein [Arabidopsis thaliana]
AT3G51960	-2.28949	9.49e-05	gi|30693563|ref|NP_190764.2|/3.0938e-134/basic leucine zipper 24 [Arabidopsis thaliana]
AT5G60530	-2.28949	2.4e-05	gi|15239360|ref|NP_200861.1|/0/late embryogenesis abundant protein-like protein [Arabidopsis thaliana]
AT2G46740	-2.28949	5.97e-09	gi|15226431|ref|NP_182197.1|/0/D-arabinono-1,4-lactone oxidase-like protein [Arabidopsis thaliana]
AT2G14610	-2.28949	2.4e-05	gi|15225974|ref|NP_179068.1|/1.48341e-93/pathogenesis-related protein 1 [Arabidopsis thaliana]
AT3G60140	-2.28949	9.49e-05	gi|15232262|ref|NP_191573.1|/0/beta-glucosidase 30 [Arabidopsis thaliana]
AT3G62270	-2.31269	1.49e-23	gi|75182036|sp|Q9M1P7.1|BOR2_ARATH/0/RecName: Full=Probable boron transporter 2 [Arabidopsis thaliana]
AT1G01060	-2.31603	9.41e-150	gi|15223290|ref|NP_171614.1|/0/protein LHY [Arabidopsis thaliana]
AT2G18980	-2.31806	9.3e-07	gi|15224266|ref|NP_179488.1|/0/peroxidase 16 [Arabidopsis thaliana]
AT2G38940	-2.32304	3.47e-11	gi|15224985|ref|NP_181428.1|/0/inorganic phosphate transporter 1-4 [Arabidopsis thaliana]
AT3G01513	-2.33679	0.000232694	gi|22330791|ref|NP_683521.1|/4.6041e-121/uncharacterized protein [Arabidopsis thaliana]
AT2G23050	-2.33679	0.000232621	gi|15227776|ref|NP_179887.1|/0/BTB/POZ domain-containing protein NPY4 [Arabidopsis thaliana]
AT5G66690	-2.34428	1.5e-20	gi|15240051|ref|NP_201470.1|/0/UDP-glycosyltransferase 72E2 [Arabidopsis thaliana]
AT2G17740	-2.34607	0.000901714	gi|7485275|pir||T08861/8.62286e-152/hypothetical protein A_TM017A05.3 - Arabidopsis thaliana
AT3G21710	-2.36966	3.61e-05	gi|42572509|ref|NP_974350.1|/7.18535e-124/uncharacterized protein [Arabidopsis thaliana]
AT5G36920	-2.36966	3.61e-05	gi|15239450|ref|NP_198508.1|/3.69985e-42/uncharacterized protein [Arabidopsis thaliana]
AT1G05700	-2.3826	0.000143461	gi|334182319|ref|NP_172061.2|/0/Leucine-rich repeat transmembrane protein kinase protein [Arabidopsis thaliana]
AT5G60760	-2.3826	0.000143508	gi|30697428|ref|NP_200884.2|/0/phytic acid metabolising protein [Arabidopsis thaliana]
AT5G40010	-2.39382	5.58e-06	gi|15242536|ref|NP_198817.1|/0/AAA-ATPase 1 [Arabidopsis thaliana]
AT4G30670	-2.40052	0.000561839	gi|89111838|gb|ABD60691.1|/7.51859e-51/At4g30670 [Arabidopsis thaliana]
AT5G38900	-2.40052	0.000562002	gi|15241578|ref|NP_198706.1|/2.46727e-122/Thioredoxin superfamily protein [Arabidopsis thaliana]
AT3G23800	-2.40813	2.23e-05	gi|15229520|ref|NP_189022.1|/0/selenium-binding protein 3 [Arabidopsis thaliana]
AT3G28580	-2.41502	3.28e-08	gi|15233037|ref|NP_189499.1|/0/AAA-type ATPase family protein [Arabidopsis thaliana]
AT1G78340	-2.41687	1.24e-09	gi|15218304|ref|NP_177956.1|/3.14666e-125/glutathione S-transferase TAU 22 [Arabidopsis thaliana]
AT1G49860	-2.42073	2.39e-15	gi|15222832|ref|NP_175408.1|/5.31211e-144/glutathione S-transferase (class phi) 14 [Arabidopsis thaliana]
AT1G60110	-2.42699	8.8e-05	gi|15218997|ref|NP_176219.1|/0/jacalin-like lectin domain-containing protein [Arabidopsis thaliana]
AT4G11650	-2.42997	7.94e-64	gi|15234263|ref|NP_192902.1|/1.62857e-147/osmotin-like protein OSM34 [Arabidopsis thaliana]
AT2G30340	-2.45941	2.07e-06	gi|30684548|ref|NP_850141.1|/9.57241e-155/LOB domain-containing protein 13 [Arabidopsis thaliana]
AT2G32300	-2.47852	4.82e-08	gi|15225223|ref|NP_180789.1|/3.46749e-146/uclacyanin 1 [Arabidopsis thaliana]
AT5G59520	-2.48541	7.26e-09	gi|15238437|ref|NP_200760.1|/0/zinc transporter 2 [Arabidopsis thaliana]
AT5G47740	-2.50361	0.000212483	gi|334188246|ref|NP_001190486.1|/1.36075e-133/Adenine nucleotide alpha hydrolases-like superfamily protein [Arabidopsis thaliana]
AT5G48940	-2.50361	2.9e-08	gi|42568408|ref|NP_199705.2|/0/LRR receptor-like serine/threonine-protein kinase RCH1 [Arabidopsis thaliana]
AT4G37070	-2.51188	3.27e-05	gi|30690843|ref|NP_849511.1|/0/patatin-related phospholipase A [Arabidopsis thaliana]
AT4G12500	-2.51776	4.99e-06	gi|15235390|ref|NP_192987.1|/1.06247e-99/bifunctional inhibitor/lipid-transfer protein/seed storage 2S albumin-like protein [Arabidopsis thaliana]
AT3G22240	-2.53391	1.69e-21	gi|240255391|ref|NP_566703.4|/2.2261e-39/uncharacterized protein [Arabidopsis thaliana]
AT2G48080	-2.55252	0.000128986	gi|30690892|ref|NP_182329.2|/0/oxidoreductase, 2OG-Fe(II) oxygenase family protein [Arabidopsis thaliana]
AT4G26200	-2.56174	3.52e-22	gi|15236142|ref|NP_194350.1|/0/1-aminocyclopropane-1-carboxylate synthase 7 [Arabidopsis thaliana]
AT3G54040	-2.57298	4.29e-30	gi|15232407|ref|NP_190972.1|/2.36227e-100/PAR1 protein [Arabidopsis thaliana]
AT5G06740	-2.59205	1.19e-05	gi|15240142|ref|NP_196292.1|/0/concanavalin A-like lectin kinase-like protein [Arabidopsis thaliana]
AT4G19030	-2.59983	7.8e-05	gi|18415224|ref|NP_567572.1|/1.09289e-165/aquaporin NIP1-1 [Arabidopsis thaliana]
AT4G37010	-2.60499	2.49e-08	gi|79326379|ref|NP_001031798.1|/8.8348e-93/centrin 2 [Arabidopsis thaliana]
AT2G43610	-2.60697	7.44e-12	gi|15224319|ref|NP_181889.1|/6.66838e-170/chitinase family protein [Arabidopsis thaliana]
AT1G73260	-2.6091	1.71e-22	gi|18410311|ref|NP_565061.1|/1.84935e-122/kunitz trypsin inhibitor 1 [Arabidopsis thaliana]
AT1G18100	-2.65206	6.42e-07	gi|15220972|ref|NP_173250.1|/1.11814e-98/protein MOTHER of FT and TF 1 [Arabidopsis thaliana]
AT1G13300	-2.66005	1.41e-26	gi|18391499|ref|NP_563926.1|/0/protein HRS1 [Arabidopsis thaliana]
AT5G17430	-2.668	0.000305655	gi|186523639|ref|NP_197245.2|/0/AP2-like ethylene-responsive transcription factor BBM [Arabidopsis thaliana]
AT1G30730	-2.668	1.38e-30	gi|15221494|ref|NP_174360.1|/0/FAD-binding and BBE domain-containing protein [Arabidopsis thaliana]
AT1G66270	-2.668	1.11e-64	gi|15219605|ref|NP_176801.1|/0/beta-glucosidase 21 [Arabidopsis thaliana]
AT1G02810	-2.69192	1.13e-22	gi|18379010|ref|NP_563662.1|/0/pectinesterase 7 [Arabidopsis thaliana]
AT4G30170	-2.69418	8.84e-21	gi|15234648|ref|NP_194746.1|/0/peroxidase 45 [Arabidopsis thaliana]
AT1G23110	-2.72245	0.00018354	gi|79350419|ref|NP_173724.2|/1.29151e-139/uncharacterized protein [Arabidopsis thaliana]
AT3G21150	-2.72655	1.86e-13	gi|15232482|ref|NP_188752.1|/4.96536e-129/B-box 32 protein [Arabidopsis thaliana]
AT5G42630	-2.73309	1.68e-05	gi|15239014|ref|NP_199077.1|/8.83447e-159/probable transcription factor KAN4 [Arabidopsis thaliana]
AT5G59090	-2.73839	3.45e-41	gi|18424191|ref|NP_568895.1|/0/subtilase 4.12 [Arabidopsis thaliana]
AT2G43590	-2.77773	3.33e-78	gi|15224312|ref|NP_181887.1|/1.75072e-161/chitinase family protein [Arabidopsis thaliana]
AT2G25810	-2.80406	4.69e-08	gi|15225195|ref|NP_180152.1|/6.90339e-141/aquaporin TIP4-1 [Arabidopsis thaliana]
AT5G19520	-2.81083	4.12e-19	gi|15239769|ref|NP_197453.1|/0/mechanosensitive channel of small conductance-like 9 [Arabidopsis thaliana]
AT4G15160	-2.82337	7.72e-52	gi|334186550|ref|NP_193252.5|/2.71546e-176/bifunctional inhibitor/lipid-transfer protein/seed storage 2S albumin-like protein [Arabidopsis thaliana]
AT5G42180	-2.82554	6.48e-05	gi|15238309|ref|NP_199033.1|/0/peroxidase [Arabidopsis thaliana]
AT1G51890	-2.83263	2.75e-08	gi|334183237|ref|NP_175601.2|/0/probable LRR receptor-like protein kinase [Arabidopsis thaliana]
AT5G24910	-2.84203	0.000706403	gi|18420859|ref|NP_568463.1|/0/cytochrome P450, family 714, subfamily A, polypeptide 1 [Arabidopsis thaliana]
AT3G55230	-2.88317	1.88e-13	gi|15233217|ref|NP_191083.1|/4.34582e-173/disease resistance-responsive, dirigent domain-containing protein [Arabidopsis thaliana]
AT3G57260	-2.90616	5.69e-26	gi|15230262|ref|NP_191285.1|/0/beta 1,3-glucanase 2 [Arabidopsis thaliana]
AT5G57090	-2.92839	7.82e-18	gi|18423936|ref|NP_568848.1|/0/auxin efflux carrier component 2 [Arabidopsis thaliana]
AT1G13480	-2.93103	1.17e-06	gi|15222860|ref|NP_172805.1|/0/uncharacterized protein [Arabidopsis thaliana]
AT3G20380	-2.93103	1.17e-06	gi|15231117|ref|NP_188673.1|/0/TRAF-like family protein [Arabidopsis thaliana]
AT5G45080	-2.93103	1.17e-06	gi|15242302|ref|NP_199321.1|/0/protein PHLOEM PROTEIN 2-LIKE A6 [Arabidopsis thaliana]
AT3G53480	-2.93395	3.92e-48	gi|15231821|ref|NP_190916.1|/0/ABC transporter G family member 37 [Arabidopsis thaliana]
AT3G22250	-2.96756	0.000248487	gi|15233322|ref|NP_188864.1|/0/UDP-glycosyltransferase 82A1 [Arabidopsis thaliana]
AT5G66390	-2.96756	3.73e-21	gi|15239370|ref|NP_201440.1|/0/peroxidase 72 [Arabidopsis thaliana]
AT3G11550	-3.01195	7.66e-06	gi|15229791|ref|NP_187762.1|/3.96178e-108/uncharacterized protein [Arabidopsis thaliana]
AT3G29250	-3.02645	0.000145769	gi|145339059|ref|NP_189570.3|/8.46641e-166/short-chain dehydrogenase reductase 4 [Arabidopsis thaliana]
AT2G29330	-3.02645	0.000145817	gi|15227073|ref|NP_180494.1|/2.4667e-144/tropinone reductase [Arabidopsis thaliana]
AT4G08770	-3.03251	9.43e-27	gi|15236606|ref|NP_192617.1|/0/peroxidase 37 [Arabidopsis thaliana]
AT1G12740	-3.05502	4.43e-06	gi|334182520|ref|NP_001184974.1|/0/cytochrome P450, family 87, subfamily A, polypeptide 2 [Arabidopsis thaliana]
AT3G03660	-3.05502	6.83e-09	gi|186509725|ref|NP_001118563.1|/2.28691e-171/WUSCHEL related homeobox 11 [Arabidopsis thaliana]
AT3G24240	-3.05502	6.84e-09	gi|15229457|ref|NP_189066.1|/0/receptor-like protein kinase 2 [Arabidopsis thaliana]
AT5G23220	-3.06709	2.01e-10	gi|15237256|ref|NP_197713.1|/2.30211e-110/nicotinamidase 3 [Arabidopsis thaliana]
AT2G19190	-3.08304	8.49e-05	gi|15224735|ref|NP_179509.1|/0/FLG22-induced receptor-like kinase 1 [Arabidopsis thaliana]
AT3G44326	-3.08304	8.49e-05	gi|79314133|ref|NP_001030807.1|/0/F-box protein [Arabidopsis thaliana]
AT5G58750	-3.08304	8.49e-05	gi|15237744|ref|NP_200683.1|/0/NAD(P)-binding Rossmann-fold superfamily protein [Arabidopsis thaliana]
AT1G08980	-3.09342	0	gi|18390964|ref|NP_563831.1|/0/amidase 1 [Arabidopsis thaliana]
AT4G12480	-3.1046	2.84e-215	gi|75101947|sp|Q39176.1|ERLI1_ARATH/8.90488e-95/RecName: Full=Lipid transfer protein EARLI 1; AltName: Full=Protein EARLY ARABIDOPSIS ALUMINUM INDUCED 1; Short=pEARLI1; Flags: Precursor [Arabidopsis thaliana]
AT1G33750	-3.10506	7.65e-08	gi|15217639|ref|NP_174635.1|/0/terpenoid synthase 22 [Arabidopsis thaliana]
AT3G44300	-3.16133	1.36e-95	gi|15229932|ref|NP_190016.1|/0/nitrilase 2 [Arabidopsis thaliana]
AT2G45220	-3.16919	3.08e-32	gi|75277238|sp|O22149.2|PME17_ARATH/0/RecName: Full=Probable pectinesterase/pectinesterase inhibitor 17; Includes: RecName: Full=Pectinesterase inhibitor 17; AltName: Full=Pectin methylesterase inhibitor 17; Includes: RecName: Full=Pectinesterase 17; Short=PE 17; AltName: Full=Pectin methylesterase 17; Short=AtPME17; Flags: Precursor [Arabidopsis thaliana]
AT4G22810	-3.18995	2.84e-05	gi|119657392|tpd|FAA00295.1|/0/TPA: AT-hook motif nuclear localized protein 24 [Arabidopsis thaliana]
AT5G09290	-3.21549	0.000919045	gi|42567747|ref|NP_196491.2|/0/Inositol monophosphatase family protein [Arabidopsis thaliana]
AT2G39530	-3.24058	1.64e-05	gi|30687915|ref|NP_181485.2|/2.18277e-92/uncharacterized protein [Arabidopsis thaliana]
AT1G74770	-3.24554	1.6e-17	gi|186495447|ref|NP_177615.2|/0/zinc ion binding protein [Arabidopsis thaliana]
AT3G54590	-3.24767	2.19e-12	gi|186511058|ref|NP_191022.2|/0/hydroxyproline-rich glycoprotein [Arabidopsis thaliana]
AT5G35940	-3.25296	2.76e-07	gi|15239241|ref|NP_198443.1|/0/jacalin-like lectin family protein [Arabidopsis thaliana]
AT2G12646	-3.28949	9.38e-06	gi|79322310|ref|NP_001031352.1|/3.7267e-153/PLATZ transcription factor family protein [Arabidopsis thaliana]
AT1G77330	-3.32511	3.55e-15	gi|18411485|ref|NP_565154.1|/4.08081e-179/1-aminocyclopropane-1-carboxylate oxidase 5 [Arabidopsis thaliana]
AT3G24300	-3.33679	5.34e-06	gi|15230092|ref|NP_189073.1|/0/ammonium transporter 1;3 [Arabidopsis thaliana]
AT4G21830	-3.35988	8.73e-39	gi|18415773|ref|NP_567637.1|/2.37733e-81/peptide methionine sulfoxide reductase B7 [Arabidopsis thaliana]
AT3G54770	-3.39382	2.88e-08	gi|7258381|emb|CAB77597.1|/3.34299e-157/RNA binding protein-like [Arabidopsis thaliana]
AT5G63600	-3.42073	3.86e-43	gi|79332035|ref|NP_001032131.1|/0/flavonol synthase 5 [Arabidopsis thaliana]
AT2G44370	-3.42699	1.21e-14	gi|15224869|ref|NP_181965.1|/1.26522e-150/cysteine/histidine-rich C1 domain-containing protein [Arabidopsis thaliana]
AT3G09220	-3.42699	1.5e-10	gi|15232607|ref|NP_187533.1|/0/laccase 7 [Arabidopsis thaliana]
AT3G46270	-3.42699	0.000178756	gi|30692696|ref|NP_190212.2|/0/receptor protein kinase-like protein [Arabidopsis thaliana]
AT5G10130	-3.49112	0.000101816	gi|15238066|ref|NP_196575.1|/8.13802e-90/pollen_Ole_e_I-domain containing protein [Arabidopsis thaliana]
AT3G28550	-3.54789	3.8e-60	gi|15233034|ref|NP_189496.1|/0/Proline-rich extensin-like family protein [Arabidopsis thaliana]
AT1G51420	-3.57242	2.24e-14	gi|15223847|ref|NP_175553.1|/0/sucrose-phosphatase 1 [Arabidopsis thaliana]
AT5G15130	-3.61141	4.99e-10	gi|29839650|sp|Q9LXG8.1|WRK72_ARATH/0/RecName: Full=Probable WRKY transcription factor 72; AltName: Full=WRKY DNA-binding protein 72 [Arabidopsis thaliana]
AT4G15393	-3.63052	9.66e-08	gi|145333127|ref|NP_001078393.1|/0/cytochrome P450, family 702, subfamily A, polypeptide 5 [Arabidopsis thaliana]
AT1G09090	-3.63998	2.78e-10	gi|42571417|ref|NP_973799.1|/0/Respiratory burst oxidase-B [Arabidopsis thaliana]
AT1G51850	-3.69548	2.5e-21	gi|15218050|ref|NP_175597.1|/0/Leucine-rich repeat protein kinase family protein [Arabidopsis thaliana]
AT2G21045	-3.74015	1.67e-08	gi|79558700|ref|NP_565497.3|/1.26743e-96/rhodanese-like domain-containing protein [Arabidopsis thaliana]
AT3G44350	-3.77491	9.21e-09	gi|186510661|ref|NP_001118771.1|/1.03161e-138/putative NAC domain-containing protein 61 [Arabidopsis thaliana]
AT5G43580	-3.77491	5.75e-06	gi|334188174|ref|NP_199171.3|/8.64982e-52/unusual seine protease inhibitor [Arabidopsis thaliana]
AT1G49570	-3.82554	4.28e-12	gi|30694586|ref|NP_175380.2|/0/peroxidase [Arabidopsis thaliana]
AT3G01420	-3.89303	5.83e-114	gi|451928962|pdb|4HHR|A/0/Chain A, Crystal Structure Of Fatty Acid Alpha-dioxygenase (arabidopsis Thaliana)
AT3G46690	-3.96756	5.41e-07	gi|15232620|ref|NP_190253.1|/0/UDP-glycosyltransferase 76E4 [Arabidopsis thaliana]
AT1G18860	-3.96756	5.42e-07	gi|20978774|sp|Q8VWV6.1|WRK61_ARATH/0/RecName: Full=Probable WRKY transcription factor 61; AltName: Full=WRKY DNA-binding protein 61 [Arabidopsis thaliana]
AT2G36100	-4.00318	1.45e-17	gi|15227576|ref|NP_181154.1|/1.0677e-108/casparian strip membrane protein 1 [Arabidopsis thaliana]
AT5G06839	-4.01195	2.99e-07	gi|334187472|ref|NP_001190244.1|/0/bZIP transcription factor TGA10 [Arabidopsis thaliana]
AT2G17080	-4.05502	0.000600871	gi|15227365|ref|NP_179300.1|/8.96823e-142/uncharacterized protein [Arabidopsis thaliana]
AT4G17785	-4.05502	0.000600697	gi|30684186|ref|NP_567540.2|/0/transcription factor MYB39 [Arabidopsis thaliana]
AT4G20000	-4.09684	9.09e-08	gi|15235258|ref|NP_193733.1|/1.68207e-117/VQ motif-containing protein [Arabidopsis thaliana]
AT4G14630	-4.11052	1.23e-11	gi|15233510|ref|NP_193199.1|/6.83456e-123/germin-like protein 9 [Arabidopsis thaliana]
AT1G51830	-4.16396	3.88e-24	gi|145336639|ref|NP_175595.2|/0/putative leucine-rich repeat protein kinase [Arabidopsis thaliana]
AT1G56680	-4.21549	0.000187581	gi|15223591|ref|NP_176061.1|/4.79739e-168/Chitinase family protein [Arabidopsis thaliana]
AT3G13610	-4.27499	4e-22	gi|15231296|ref|NP_187970.1|/0/feruloyl CoA ortho-hydroxylase 1 [Arabidopsis thaliana]
AT3G05920	-4.28949	0.000103773	gi|18397408|ref|NP_566264.1|/3.79538e-71/heavy-metal-associated domain-containing protein [Arabidopsis thaliana]
AT1G51840	-4.28949	0.000103739	gi|9802786|gb|AAF99855.1|AC015448_5/1.84187e-102/Hypothetical protein [Arabidopsis thaliana]
AT5G47000	-4.35988	5.72e-05	gi|18422742|ref|NP_568674.1|/0/peroxidase 65 [Arabidopsis thaliana]
AT4G00080	-4.39382	1.41e-19	gi|15236702|ref|NP_191919.1|/9.19477e-116/unfertilized embryo sac 11 protein [Arabidopsis thaliana]
AT1G23720	-4.45941	8.29e-62	gi|15220851|ref|NP_173784.1|/0/Proline-rich extensin-like family protein [Arabidopsis thaliana]
AT5G54370	-4.49112	1.73e-05	gi|15239629|ref|NP_200248.1|/0/late embryogenesis abundant protein-like protein [Arabidopsis thaliana]
AT5G19890	-4.49112	1.73e-05	gi|18420061|ref|NP_568385.1|/0/peroxidase 59 [Arabidopsis thaliana]
AT1G26250	-4.53741	6.29e-66	gi|15222668|ref|NP_173949.1|/0/Proline-rich extensin-like family protein [Arabidopsis thaliana]
AT2G44380	-4.55252	9.41e-06	gi|15224871|ref|NP_181966.1|/2.48863e-151/cysteine/histidine-rich C1 domain-containing protein [Arabidopsis thaliana]
AT4G15390	-4.65514	1.11e-78	gi|15233802|ref|NP_193274.1|/0/HXXXD-type acyl-transferase family protein [Arabidopsis thaliana]
AT4G19690	-4.66337	3.93e-73	gi|79478110|ref|NP_567590.3|/0/Fe(2+) transport protein 1 [Arabidopsis thaliana]
AT3G48340	-4.70452	5.9e-19	gi|334185815|ref|NP_680113.3|/0/KDEL-tailed cysteine endopeptidase CEP2 [Arabidopsis thaliana]
AT4G21840	-4.72245	1.49e-06	gi|15234621|ref|NP_193915.1|/9.06665e-81/methionine sulfoxide reductase B8 [Arabidopsis thaliana]
AT3G54580	-4.74366	1.6e-32	gi|15232552|ref|NP_191021.1|/0/Proline-rich extensin-like family protein [Arabidopsis thaliana]
AT1G51860	-4.82554	4.35e-07	gi|281185489|sp|C0LGG4.2|Y1518_ARATH/0/RecName: Full=Probable LRR receptor-like serine/threonine-protein kinase At1g51860; Flags: Precursor [Arabidopsis thaliana]
AT4G22070	-4.82554	4.35e-07	gi|18415833|ref|NP_567644.1|/0/WRKY DNA-binding protein 31 [Arabidopsis thaliana]
AT3G59370	-4.82554	4.35e-07	gi|15231671|ref|NP_191496.1|/4.65551e-45/vacuolar calcium-binding protein-like protein [Arabidopsis thaliana]
AT3G01190	-4.92175	1.26e-07	gi|15232058|ref|NP_186768.1|/0/peroxidase 27 [Arabidopsis thaliana]
AT2G46750	-4.96756	2.18e-23	gi|30690494|ref|NP_182198.2|/0/D-arabinono-1,4-lactone oxidase-like protein [Arabidopsis thaliana]
AT5G56080	-4.98548	1.71e-39	gi|15241120|ref|NP_200419.1|/0/nicotianamine synthase 2 [Arabidopsis thaliana]
AT4G12490	-5.05199	8.3e-117	gi|15235388|ref|NP_192986.1|/1.00867e-103/Bifunctional inhibitor/lipid-transfer protein/seed storage 2S albumin superfamily protein [Arabidopsis thaliana]
AT2G33790	-5.39382	6.47e-11	gi|15226166|ref|NP_180935.1|/3.52879e-139/arabinogalactan protein 30 [Arabidopsis thaliana]
AT5G45070	-5.47535	3.54e-23	gi|15242301|ref|NP_199320.1|/0/protein PHLOEM PROTEIN 2-LIKE A8 [Arabidopsis thaliana]
AT3G55150	-5.71626	0.000889222	gi|22331801|ref|NP_191075.2|/0/exocyst subunit exo70 family protein H1 [Arabidopsis thaliana]
AT5G22355	-5.76111	0.000480406	gi|22326989|ref|NP_680208.1|/0/cysteine/histidine-rich C1 domain-containing protein [Arabidopsis thaliana]
AT4G31940	-5.78006	2.84e-73	gi|15236586|ref|NP_194922.1|/0/cytochrome P450, family 82, subfamily C, polypeptide 4 [Arabidopsis thaliana]
AT5G64100	-5.81305	5.71e-30	gi|15237613|ref|NP_201215.1|/0/peroxidase 69 [Arabidopsis thaliana]
AT2G21840	-5.82972	7.26e-05	gi|145360196|ref|NP_179775.2|/0/Cysteine/Histidine-rich C1 domain family protein [Arabidopsis thaliana]
AT5G17820	-5.87445	1.12e-15	gi|15238030|ref|NP_197284.1|/8.79264e-177/peroxidase 57 [Arabidopsis thaliana]
AT3G21720	-5.94484	5.16e-83	gi|30686361|ref|NP_188809.2|/0/isocitrate lyase [Arabidopsis thaliana]
AT2G14820	-6.26828	2.03e-05	gi|15226012|ref|NP_179089.1|/0/BTB/POZ domain-containing protein NPY2 [Arabidopsis thaliana]
AT5G43350	-6.52215	2.21e-25	gi|15239848|ref|NP_199149.1|/0/inorganic phosphate transporter 1-1 [Arabidopsis thaliana]
AT5G18560	-6.58433	0.000889714	gi|42567940|ref|NP_197357.2|/0/ethylene response factor PUCHI [Arabidopsis thaliana]
AT5G42590	-6.76328	5.61e-06	gi|15239008|ref|NP_199073.1|/0/cytochrome P450 71A16 [Arabidopsis thaliana]
AT1G54890	-6.97549	7.26e-05	gi|15221921|ref|NP_175886.1|/0/Late embryogenesis abundant-related protein [Arabidopsis thaliana]
AT1G57850	-7.71853	0.000889468	gi|15217793|ref|NP_176094.1|/1.68281e-86/Toll-Interleukin-Resistance domain-containing protein [Arabidopsis thaliana]
AT1G52070	-7.93408	1.64e-08	gi|30695134|ref|NP_175619.2|/0/jacalin-like lectin domain-containing protein [Arabidopsis thaliana]
AT1G64160	-7.98519	3.84e-05	gi|15222633|ref|NP_176598.1|/6.53799e-103/dirigent-like protein DIR5 [Arabidopsis thaliana]
AT3G23470	-8.03381	2.22e-13	gi|79415879|ref|NP_188989.2|/0/cyclopropane-fatty-acyl-phospholipid synthase [Arabidopsis thaliana]
AT3G04320	-8.05086	5.61e-06	gi|79390659|ref|NP_187082.2|/7.86826e-117/Kunitz family trypsin and protease inhibitor protein [Arabidopsis thaliana]
AT4G12550	-8.22405	0.00088996	gi|15235406|ref|NP_192992.1|/4.72243e-58/auxin-Induced in Root cultures 1 [Arabidopsis thaliana]
AT5G62340	-8.39237	1.16e-07	gi|15241798|ref|NP_201040.1|/3.78866e-114/plant invertase/pectin methylesterase inhibitor domain-containing protein [Arabidopsis thaliana]
AT1G52120	-8.52987	6.87e-19	gi|79364113|ref|NP_175624.2|/0/jacalin-like lectin domain-containing protein [Arabidopsis thaliana]
AT5G44610	-8.57395	4.21e-07	gi|18422461|ref|NP_568636.1|/1.24546e-88/microtubule-associated protein 18 [Arabidopsis thaliana]

## Sheet: VENN results
Groups	Gene_Count	Gene_Id
AMI1ind down / wt up / ami1 up	1	AT1G02820
AMI1ind up / wt up / ami1 up	16	AT1G21790
		AT5G45950
		AT3G25770
		AT1G09350
		AT2G39980
		AT4G05100
		AT1G56600
		AT4G21440
		AT3G55500
		AT5G10410
		AT1G53470
		AT2G42540
		AT1G05100
		AT2G36750
		AT5G59220
		AT4G33930
wt up / ami1 up	19	AT1G14250
		AT1G61120
		AT3G27250
		AT5G54300
		AT1G01030
		AT5G52400
		AT1G73480
		AT2G36590
		AT1G52000
		AT5G40390
		AT3G28220
		AT5G63450
		AT1G60590
		AT1G68570
		AT3G55130
		AT3G21670
		AT2G15020
		AT1G18710
		AT5G24420
AMI1ind down / wt up	3	AT5G56080
		AT1G66100
		AT3G24460
AMI1ind up / wt up	12	AT5G52310
		AT2G42530
		AT4G33905
		AT1G73510
		AT1G70640
		AT5G44210
		AT4G15550
		AT1G29395
		AT3G56090
		AT1G26770
		AT2G17830
		AT3G20395
AMI1ind down / ami1 down	25	AT1G35710
		AT2G07680
		AT5G10760
		AT3G57260
		AT1G30135
		AT4G25020
		AT5G28630
		AT3G03660
		AT2G14610
		AT3G23800
		AT1G29500
		AT5G06930
		AT1G68870
		AT3G54790
		AT3G44350
		AT4G38560
		AT4G23180
		AT2G31110
		AT5G47370
		AT4G00970
		AT1G10340
		AT3G07195
		AT1G12080
		AT2G22810
		AT1G15890
AMI1ind up / ami1 down	7	AT2G22980
		AT2G15890
		AT5G23240
		AT2G33830
		AT4G04330
		AT4G01130
		AT2G21660
AMI1ind down / ami1 up	50	AT2G41240
		AT5G04950
		AT4G22880
		AT5G01870
		AT1G52342
		AT3G51240
		AT4G36700
		AT5G24150
		AT5G07990
		AT1G15380
		AT3G56980
		AT4G01080
		AT4G10120
		AT1G23205
		AT1G17100
		AT5G13930
		AT5G48010
		AT2G36690
		AT1G08980
		AT2G21320
		AT3G28270
		AT5G17050
		AT2G32530
		AT1G10960
		AT5G05270
		AT5G58350
		AT5G13170
		AT5G02830
		AT1G01060
		AT5G43630
		AT2G28780
		AT4G26850
		AT1G32900
		AT5G39580
		AT4G34550
		AT3G56970
		AT4G00050
		AT1G65060
		AT5G54060
		AT4G14090
		AT3G15354
		AT5G15950
		AT1G64500
		AT3G09600
		AT3G29590
		AT1G55960
		AT1G13080
		AT2G27420
		AT3G01420
		AT2G46830
AMI1ind up / ami1 up	81	AT1G09530
		AT1G05680
		AT1G62710
		AT1G48100
		AT4G26080
		AT2G46370
		AT1G52690
		AT3G02010
		AT4G35160
		AT3G50970
		AT2G45570
		AT1G69480
		AT1G10585
		AT2G36780
		AT5G67620
		AT4G37990
		AT4G22530
		AT3G24420
		AT3G04000
		AT4G01870
		AT1G10060
		AT2G33380
		AT2G43820
		AT1G54100
		AT1G04570
		AT2G36770
		AT5G06760
		AT3G14810
		AT5G15960
		AT5G57050
		AT2G32510
		AT4G34230
		AT5G37300
		AT1G07430
		AT4G10960
		AT3G19270
		AT3G46670
		AT3G17130
		AT1G69260
		AT2G22200
		AT3G29575
		AT2G37770
		AT1G53480
		AT2G39030
		AT1G02205
		AT3G04010
		AT1G73390
		AT3G48240
		AT5G24570
		AT4G23600
		AT5G39050
		AT5G66400
		AT2G16630
		AT3G01345
		AT5G24080
		AT5G64230
		AT1G52890
		AT1G10370
		AT2G43520
		AT2G47780
		AT1G04220
		AT5G19440
		AT4G35190
		AT3G56260
		AT4G14060
		AT2G46680
		AT2G34810
		AT3G15670
		AT4G24960
		AT4G33467
		AT5G47330
		AT5G50360
		AT1G51780
		AT1G17940
		AT5G15970
		AT5G54585
		AT2G02990
		AT2G28190
		AT1G53490
		AT4G22620
		AT3G28007
wt up	39	AT4G25230
		AT4G38810
		AT5G24770
		ATCG01050
		ATCG00290
		AT3G18950
		ATCG00730
		ATCG00280
		ATCG00020
		ATCG00040
		AT4G12000
		ATCG00270
		AT2G40475
		AT5G36910
		AT4G10265
		AT5G33251
		AT1G15430
		AT1G02390
		AT5G64770
		AT1G30820
		ATCG01100
		AT1G18460
		AT5G08350
		AT4G08170
		AT5G55090
		AT4G15440
		AT1G33960
		AT1G63540
		AT1G02340
		AT4G19170
		AT5G17700
		AT1G54040
		AT4G03060
		AT5G64401
		ATCG00090
		AT4G04840
		AT1G10560
		AT2G04450
		AT5G47240
ami1 down	258	AT4G19520
		AT1G74170
		AT4G17460
		AT1G66930
		AT3G47340
		AT4G32280
		AT4G00950
		AT1G79440
		AT5G26700
		AT3G61280
		AT1G79700
		AT4G17615
		AT2G46430
		AT1G22570
		AT5G66580
		AT1G26945
		AT2G33990
		AT3G59330
		AT3G06890
		AT3G12590
		AT1G75380
		AT5G22690
		AT2G41990
		AT1G19025
		AT2G38465
		AT3G43960
		AT1G27460
		AT1G56540
		AT1G65790
		AT1G65010
		AT5G20250
		AT3G48100
		AT2G03530
		AT4G23220
		AT1G08610
		AT1G22740
		AT3G23080
		AT5G06610
		AT4G00238
		AT4G33625
		AT3G03850
		AT1G10550
		AT5G63810
		AT1G20010
		AT5G02170
		AT1G30420
		AT5G40450
		AT5G52750
		AT3G02410
		AT5G55520
		AT3G19850
		AT1G56520
		AT1G56660
		AT5G64870
		AT5G38700
		AT5G13710
		AT5G62520
		AT2G24390
		AT5G22920
		AT2G15880
		AT2G20142
		AT2G36410
		AT3G20350
		AT5G18080
		AT2G31865
		AT3G11010
		AT3G16180
		AT3G26490
		AT5G04310
		AT4G03205
		AT1G11545
		AT5G60100
		AT4G39770
		AT2G26190
		AT5G11420
		AT5G10100
		AT3G10310
		AT3G22235
		AT5G04010
		AT1G21270
		AT2G24600
		AT4G16940
		AT5G42250
		AT1G66090
		AT2G31870
		AT5G10430
		AT4G25940
		AT4G01330
		AT5G20260
		AT5G12940
		AT5G63770
		AT3G47860
		AT3G54920
		AT4G19530
		AT4G04340
		AT1G21130
		AT5G19250
		AT5G63140
		AT1G64640
		AT1G77210
		AT4G23820
		AT5G19780
		AT1G03100
		AT1G78280
		AT3G53800
		AT1G56720
		AT2G32680
		AT4G14365
		AT1G22370
		AT3G15620
		AT5G66900
		AT3G22231
		AT4G23400
		AT4G35770
		AT3G54000
		AT5G03050
		AT5G65390
		AT1G66940
		AT1G74440
		AT2G42580
		AT1G56140
		AT3G05130
		AT3G14870
		AT2G25420
		AT2G24645
		AT1G23790
		AT5G03120
		AT3G59310
		AT4G08593
		AT3G07980
		AT1G72280
		AT1G34760
		AT5G32450
		AT5G18590
		AT1G29510
		AT2G18010
		AT5G41060
		AT3G50740
		AT3G62550
		AT1G49130
		AT1G55450
		AT3G26740
		AT5G60900
		AT2G38630
		AT5G65850
		AT5G01950
		AT2G47930
		AT2G19640
		AT3G05900
		AT4G23130
		AT1G28330
		AT1G01240
		AT2G18300
		AT2G17780
		AT5G02160
		AT5G53220
		AT3G01290
		AT1G05630
		AT2G30600
		AT1G63260
		AT5G23210
		AT5G05890
		AT2G42040
		AT4G20260
		AT2G17850
		AT2G05810
		AT5G55230
		AT2G29065
		AT2G32140
		AT5G02200
		AT3G15540
		AT1G56220
		AT4G34770
		AT1G52290
		AT2G06925
		AT3G25020
		AT1G20620
		AT5G18030
		AT3G55240
		AT5G11610
		AT3G42800
		AT4G12690
		AT3G12220
		AT5G14920
		AT4G31650
		AT5G51550
		AT5G66640
		AT4G26810
		AT4G39830
		AT5G20410
		AT2G45180
		AT1G15125
		AT5G46470
		AT1G13210
		AT3G60320
		AT1G15580
		AT4G19540
		AT4G31050
		AT4G16960
		AT5G51810
		AT1G22330
		AT2G42870
		AT4G38070
		AT5G43440
		AT3G19240
		AT5G46510
		AT5G38210
		AT4G21940
		AT4G36280
		AT5G52760
		AT2G15042
		AT5G47020
		AT2G06850
		AT4G18880
		AT3G27210
		AT1G11350
		AT3G17700
		AT1G74670
		AT4G18205
		AT4G14560
		AT4G33290
		AT2G34510
		AT4G39890
		AT4G04955
		AT5G39020
		AT1G51940
		AT2G11810
		AT3G47570
		AT4G08470
		AT1G29430
		AT2G24610
		AT5G65120
		AT4G14400
		AT2G14560
		AT1G57980
		AT4G27440
		AT5G41750
		AT5G14550
		AT5G55790
		AT2G21510
		AT2G42170
		AT3G25400
		AT5G12230
		AT3G01830
		AT5G22250
		AT5G51670
		AT1G72645
		AT5G06690
		AT1G01560
		AT1G21090
		AT1G44780
		AT4G38550
		AT1G05820
		AT1G33760
		AT1G21100
		AT5G07590
		AT4G02070
		AT5G44680
ami1 up	257	AT4G22485
		AT3G54820
		AT3G22840
		AT2G39350
		AT2G21640
		AT4G15430
		AT3G16175
		AT1G46768
		AT3G53420
		AT2G38870
		AT3G16360
		AT1G26560
		AT1G79270
		AT1G62570
		AT3G11660
		AT4G22920
		AT3G27810
		AT4G14690
		AT5G53970
		AT1G71890
		AT5G62430
		AT1G52565
		AT2G30230
		AT2G41380
		AT3G48310
		AT3G27970
		AT3G04140
		AT2G35700
		AT1G28600
		AT3G02480
		AT4G12320
		AT1G32240
		AT5G55120
		AT3G61220
		AT1G66390
		AT2G37180
		AT3G55290
		AT3G05180
		AT5G37260
		AT1G56650
		AT2G36790
		AT5G53760
		AT2G19650
		AT1G59700
		AT1G73325
		AT5G63090
		AT4G22513
		AT5G42760
		AT2G47800
		AT2G16890
		AT3G13040
		AT4G31870
		AT5G15850
		AT5G24240
		AT5G44410
		AT2G17300
		AT1G07500
		AT1G70260
		AT1G45191
		AT1G65620
		AT3G51895
		AT4G37150
		AT1G69490
		AT4G37760
		AT1G72030
		AT1G12030
		AT3G59710
		AT4G08870
		AT5G07460
		AT1G35560
		AT3G47295
		AT5G48850
		AT5G19850
		AT2G41190
		AT1G20160
		AT1G70580
		AT4G30140
		AT3G22100
		AT4G39800
		AT5G17220
		AT1G13650
		AT5G41050
		AT1G80340
		AT3G22740
		AT5G01820
		AT5G25610
		AT2G20750
		AT5G47610
		AT5G39660
		AT1G80760
		AT1G01520
		AT2G47485
		AT2G37040
		AT3G61890
		AT1G16410
		AT3G21660
		AT5G09570
		AT5G25130
		AT5G24120
		AT5G24155
		AT1G77450
		AT1G65860
		AT3G03780
		AT2G46790
		AT3G21760
		AT3G28070
		AT3G09270
		AT4G04020
		AT1G32940
		AT4G01430
		AT1G70850
		AT4G39330
		AT3G19710
		AT3G56290
		AT2G03760
		AT1G10640
		AT1G72120
		AT2G23590
		AT2G39330
		AT1G05560
		AT5G19730
		AT5G10300
		AT5G38940
		AT3G48510
		AT2G32540
		AT4G39940
		AT5G59510
		AT1G16400
		AT5G49740
		AT3G55120
		AT1G18590
		AT2G39250
		AT1G62420
		AT5G01260
		AT2G01890
		AT3G58990
		AT4G22470
		AT5G01200
		AT1G78290
		AT5G64700
		AT4G09500
		AT3G02020
		AT4G35090
		AT5G56795
		AT2G41290
		AT2G31380
		AT2G22330
		AT3G57020
		AT2G34070
		AT2G14580
		AT4G13410
		AT5G60890
		AT5G52300
		AT4G01895
		AT5G41900
		AT3G49620
		AT1G43160
		AT2G36630
		AT1G58520
		AT1G51140
		AT5G65890
		AT4G38410
		AT4G22505
		AT1G08830
		AT5G59540
		AT4G31910
		AT3G01060
		AT3G03190
		AT4G21910
		AT4G39510
		AT3G11480
		AT4G09820
		AT4G00430
		AT5G13370
		AT1G62760
		AT4G22520
		AT1G33110
		AT3G21750
		AT5G18670
		AT2G34720
		AT3G06490
		AT3G55110
		AT3G17609
		AT3G25760
		AT3G02380
		AT2G41250
		AT4G27030
		AT1G30320
		AT5G07690
		AT4G24700
		AT3G23810
		AT3G26290
		AT3G21870
		AT3G21230
		AT3G47430
		AT4G01070
		AT1G72770
		AT3G54600
		AT4G16690
		AT1G79520
		AT1G19670
		AT1G07720
		AT3G28600
		AT1G19490
		AT2G31560
		AT1G56580
		AT5G53200
		AT3G16330
		AT3G48460
		AT2G04050
		AT3G45140
		AT5G42800
		AT1G62540
		AT5G62130
		AT3G46660
		AT5G17390
		AT5G64250
		AT5G10930
		AT3G12320
		AT3G03990
		AT5G43150
		AT1G22500
		AT4G33666
		AT2G44810
		AT3G52740
		AT3G05936
		AT2G36080
		AT5G06570
		AT5G61820
		AT3G47600
		AT2G34080
		AT5G58770
		AT1G69790
		AT3G44990
		AT2G37170
		AT5G13330
		AT3G26320
		AT5G56840
		AT4G29700
		AT5G02020
		AT5G17300
		AT5G52570
		AT5G65870
		AT3G57010
		AT1G20070
		AT3G47500
		AT4G16760
		AT5G48880
		AT2G37760
		AT1G62560
		AT1G09500
		AT1G78170
		AT5G08640
		AT1G07590
		AT1G07010
		AT5G28237
		AT1G07985
AMI1ind down	411	AT4G30670
		AT1G65486
		AT3G18710
		AT5G66390
		AT1G51890
		AT5G22355
		AT2G28200
		AT4G20110
		AT3G02830
		AT1G69810
		AT1G65610
		AT5G26280
		AT1G15210
		AT3G09220
		AT5G01040
		AT3G23430
		AT4G26790
		AT5G49620
		AT1G70250
		AT3G14280
		AT5G21100
		AT1G23720
		AT1G51820
		AT1G69050
		AT3G46690
		AT4G37320
		AT3G54220
		AT2G21840
		AT1G51830
		AT1G77330
		AT4G12490
		AT1G24148
		AT3G16660
		AT5G26220
		AT1G73870
		AT3G26470
		AT1G12010
		AT5G45080
		AT1G42550
		AT5G35940
		AT3G05730
		AT2G38940
		AT2G41800
		AT3G51330
		AT2G44790
		AT4G12480
		AT2G27000
		AT1G09090
		AT1G18100
		AT5G15130
		AT4G35380
		AT4G20000
		AT2G44380
		AT2G19190
		AT3G52430
		AT2G31880
		AT5G19890
		AT1G49570
		AT1G13609
		AT3G03130
		AT2G34390
		AT2G43610
		AT4G19030
		AT2G34150
		AT5G02780
		AT2G44370
		AT4G16370
		AT1G74770
		AT5G22890
		AT4G14630
		AT1G55910
		AT5G47740
		AT5G41740
		AT1G51850
		AT1G23110
		AT5G02260
		AT3G23470
		AT4G37390
		AT1G16110
		AT1G57850
		AT1G02520
		AT4G22070
		AT5G40010
		AT1G51790
		AT4G35270
		AT5G58750
		AT4G18220
		AT1G05260
		AT2G39518
		AT1G01580
		AT1G31290
		AT2G29350
		AT1G02360
		AT3G14260
		AT2G29330
		AT5G46490
		AT5G19240
		AT5G23220
		AT5G14880
		AT2G01430
		AT1G03940
		AT1G54000
		AT2G02780
		AT4G31940
		AT4G17770
		AT1G65490
		AT5G06740
		AT2G45430
		AT1G73260
		AT1G51270
		AT3G16460
		AT1G16130
		AT3G29250
		AT1G78340
		AT2G15390
		AT2G23050
		AT5G24910
		AT2G17080
		AT4G00080
		AT5G54370
		AT5G41040
		AT2G21185
		AT3G53480
		AT4G25240
		AT3G46700
		AT3G58070
		AT1G47395
		AT5G45070
		AT1G30530
		AT5G56860
		AT1G51800
		AT3G02050
		AT4G13660
		AT3G04320
		AT1G05700
		AT3G21530
		AT2G30130
		AT2G47550
		AT1G10850
		AT1G65845
		AT5G48110
		AT4G37010
		AT3G46280
		AT5G48430
		AT1G50590
		AT4G15393
		AT3G44320
		AT1G30730
		AT5G42630
		AT5G59520
		AT3G49810
		AT5G10130
		AT5G20960
		AT1G61560
		AT4G19690
		AT1G14870
		AT5G67450
		AT5G44380
		AT2G17740
		AT1G65500
		AT1G35910
		AT1G09240
		AT4G35640
		AT4G15390
		AT1G51420
		AT3G48200
		AT2G46740
		AT3G22275
		AT3G20370
		AT3G14680
		AT4G21850
		AT1G09560
		AT2G43140
		AT1G33750
		AT3G05400
		AT5G64810
		AT1G78000
		AT4G08770
		AT5G17330
		AT2G47130
		AT2G43570
		AT3G47090
		AT3G11550
		AT2G35960
		AT5G63660
		AT3G59370
		AT1G13300
		AT5G19470
		AT5G65690
		AT5G59090
		AT1G51840
		AT1G15260
		AT1G36180
		AT1G61590
		AT4G11290
		AT3G58810
		AT1G66280
		AT3G20830
		AT1G32450
		AT3G54770
		AT4G19810
		AT1G23730
		AT1G65690
		AT1G33080
		AT5G26260
		AT1G73620
		AT3G24240
		AT1G50180
		AT2G35930
		AT1G69930
		AT5G10580
		AT1G24145
		AT5G13080
		AT3G44326
		AT4G29690
		AT3G28345
		AT3G23880
		AT3G23510
		AT4G22810
		AT5G18560
		AT2G18193
		AT3G08860
		AT3G19450
		AT2G30770
		AT3G01190
		AT3G24300
		AT5G60020
		AT3G15510
		AT1G73040
		AT4G25700
		AT5G60760
		AT5G23730
		AT4G37400
		AT2G42760
		AT2G26695
		AT3G54040
		AT1G66270
		AT5G44610
		AT3G52450
		AT5G62340
		AT4G32650
		AT5G25830
		AT2G39200
		AT3G21720
		AT3G09940
		AT5G17820
		AT5G58120
		AT4G17785
		AT5G43350
		AT4G23550
		AT2G45220
		AT5G36925
		AT4G35180
		AT3G51960
		AT1G30700
		AT5G42180
		AT4G37070
		AT1G18980
		AT1G30720
		AT2G21045
		AT3G22250
		AT1G29280
		AT1G11670
		AT3G45610
		AT2G39530
		AT3G22600
		AT2G25160
		AT3G46270
		AT3G28580
		AT3G21510
		AT3G21710
		AT4G16260
		AT4G15248
		AT4G08040
		AT4G21830
		AT4G21840
		AT4G13420
		AT4G13810
		AT5G48940
		AT1G52070
		AT3G46130
		AT3G20380
		AT1G70170
		AT1G56680
		AT5G36920
		AT3G01260
		AT1G58410
		AT1G75280
		AT3G44300
		AT2G30760
		AT2G18690
		AT3G60140
		AT3G14940
		AT3G55150
		AT2G14820
		AT4G15340
		AT5G66740
		AT1G08430
		AT2G39510
		AT5G63600
		AT4G12500
		AT2G14960
		AT3G26590
		AT3G19390
		AT5G09460
		AT3G13610
		AT2G36100
		AT3G62040
		AT2G32300
		AT3G23180
		AT3G21390
		AT2G46750
		AT2G36120
		AT5G48657
		AT5G47990
		AT1G18860
		AT3G26210
		AT3G54580
		AT5G47000
		AT2G18980
		AT1G80240
		AT1G67330
		AT3G16670
		AT5G19520
		AT2G12646
		AT1G64160
		AT5G06839
		AT2G27660
		AT2G37130
		AT4G00910
		AT1G13480
		AT2G34020
		AT1G73120
		AT3G62270
		AT1G54890
		AT1G71870
		AT5G42590
		AT4G15160
		AT5G38900
		AT1G17180
		AT1G33610
		AT5G13770
		AT5G09290
		AT3G55230
		AT1G02810
		AT5G66210
		AT3G22240
		AT3G28540
		AT5G57090
		AT3G48340
		AT4G11650
		AT2G25810
		AT3G61210
		AT2G04170
		AT3G21150
		AT4G22710
		AT4G30520
		AT1G26960
		AT3G15240
		AT5G45380
		AT1G15040
		AT4G17800
		AT2G48080
		AT1G26250
		AT4G26200
		AT3G22550
		AT1G12740
		AT5G50760
		AT4G18360
		AT1G65870
		AT5G66690
		AT5G43580
		AT1G47400
		AT3G04720
		AT4G23690
		AT5G64100
		AT1G71400
		AT3G26440
		AT5G44160
		AT3G15300
		AT5G24380
		AT4G37520
		AT1G49860
		AT3G54590
		AT2G19970
		AT3G28550
		AT3G05920
		AT3G44550
		AT4G23990
		AT1G51860
		AT4G24340
		AT5G60530
		AT5G14330
		AT2G25980
		AT4G00820
		AT1G60110
		AT3G27170
		AT5G04150
		AT5G17430
		AT4G30170
		AT2G30340
		AT3G01513
		AT4G37560
		AT3G12500
		AT2G33790
		AT2G26080
		AT3G63370
		AT4G12550
		AT3G26500
		AT1G52120
		AT2G43590
AMI1ind up	198	AT3G46230
		AT3G15630
		AT5G67480
		AT3G56790
		AT2G36640
		AT2G40300
		AT4G31860
		AT5G54960
		AT2G21130
		AT1G53540
		AT1G21540
		AT5G51440
		AT5G59720
		AT3G07650
		AT2G18170
		AT4G21215
		AT4G10250
		AT1G77520
		AT5G24470
		AT3G52905
		AT2G15960
		AT3G46640
		AT5G18540
		AT5G13990
		AT3G51400
		AT1G76620
		AT1G53920
		AT3G11020
		AT2G40750
		AT5G12020
		AT4G33540
		AT5G55180
		AT5G27280
		AT3G09540
		AT3G01840
		AT3G05880
		AT2G29500
		AT1G62045
		AT3G55970
		AT4G25990
		AT5G51990
		AT2G41540
		AT2G28900
		AT4G14270
		AT5G05220
		AT5G01520
		AT1G68050
		AT1G76955
		AT3G03341
		AT1G51090
		AT3G05800
		AT2G01170
		AT1G15520
		AT1G17665
		AT5G58600
		AT2G21620
		AT5G03720
		AT1G78600
		AT5G30495
		AT4G25200
		AT3G12510
		AT4G24040
		AT4G25433
		AT2G27200
		AT4G33980
		AT1G16850
		AT4G27670
		AT4G30650
		AT3G09350
		AT1G08890
		AT1G68500
		AT4G28240
		AT4G35720
		AT4G21380
		AT1G25250
		AT4G05330
		AT4G16146
		AT2G35300
		AT2G18050
		AT1G77000
		AT2G16700
		AT5G15940
		AT5G16960
		AT5G03210
		AT3G63060
		AT2G22450
		AT4G18050
		AT5G04370
		AT3G05640
		AT2G40080
		AT5G15660
		AT5G44260
		AT4G11190
		AT2G40340
		AT5G54165
		AT1G49450
		AT1G69750
		AT1G56300
		AT5G28300
		AT3G49710
		AT1G02065
		AT2G27270
		AT4G06746
		AT2G01610
		AT4G17550
		AT5G22500
		AT4G21323
		AT3G62590
		AT4G16563
		AT1G60470
		AT4G11600
		AT1G52560
		AT4G27560
		AT1G20440
		AT2G22870
		AT4G34950
		AT1G71000
		AT1G14120
		AT2G07734
		AT5G03030
		AT4G13280
		AT5G46590
		AT4G17140
		AT3G45660
		AT2G22690
		AT2G34850
		AT4G13290
		AT3G56400
		AT1G20450
		AT3G24090
		AT4G25480
		AT4G38580
		AT3G55940
		AT5G35320
		AT1G32860
		AT5G63300
		AT4G34650
		AT1G73330
		AT2G17280
		AT5G58700
		AT1G23060
		AT4G19390
		AT5G14470
		AT2G42150
		AT4G33985
		AT1G50750
		AT4G28140
		AT2G47890
		AT2G19450
		AT5G15820
		AT1G55500
		AT2G26150
		AT1G64890
		AT2G15970
		AT3G03640
		AT3G59530
		AT4G20970
		AT2G01520
		AT2G41230
		AT2G20560
		AT2G24560
		AT5G42825
		AT5G48250
		AT3G20810
		AT1G03070
		AT1G22470
		AT1G67970
		AT1G71240
		AT5G11150
		AT1G07400
		AT3G47160
		AT5G04250
		AT2G02100
		AT5G01740
		AT5G09470
		AT2G40230
		AT3G62740
		AT5G57060
		AT1G80130
		AT5G12030
		AT5G42900
		AT1G12710
		AT5G61290
		AT5G16380
		AT4G24390
		AT4G25490
		AT5G67520
		AT1G11210
		AT4G10270
		AT1G49350
		AT3G25480
		AT5G07010
		AT1G16030
		AT1G69870
		AT4G02170
		AT5G58070
		AT1G20030
		AT3G20520

## Sheet: Enrichment analysis
GO BP | GO:0009628: Response to abiotic stimulus Padj = 2.314x10-3
Gene_ID	Name	Description
AT3G25770	AOC2	AOC2 [Source:UniProtKB/TrEMBL;Acc:A0A178VKE4]
AT1G09350	GOLS3	Hexosyltransferase (Fragment) [Source:UniProtKB/TrEMBL;Acc:W8PVD7]
AT2G39980	AT2G39980	At2g39980/T28M21.14 [Source:UniProtKB/TrEMBL;Acc:O04201]
AT1G56600	GOLS2	Galactinol synthase 2 [Source:UniProtKB/Swiss-Prot;Acc:Q9FXB2]
AT4G21440	ATMYB102	Transcription factor MYB102 [Source:UniProtKB/Swiss-Prot;Acc:Q9LDR8]
AT2G42540	COR15A	Protein COLD-REGULATED 15A, chloroplastic [Source:UniProtKB/Swiss-Prot;Acc:Q42512]
AT1G05100	MAPKKK18	Mitogen-activated protein kinase kinase kinase 18 [Source:UniProtKB/Swiss-Prot;Acc:Q9ZVP5]
AT2G36750	UGT73C1	UDP-glycosyltransferase 73C1 [Source:UniProtKB/Swiss-Prot;Acc:Q9ZQ99]
AT5G59220	SAG113	Probable protein phosphatase 2C 78 [Source:UniProtKB/Swiss-Prot;Acc:Q9FIF5]
GO BP | GO:0009737: Response to abscisic acid Padj = 2.209x10-2
Gene_ID	Name	Description
AT4G05100	AtMYB74	Transcription factor MYB74 [Source:UniProtKB/Swiss-Prot;Acc:Q9M0Y5]
AT1G56600	GOLS2	Galactinol synthase 2 [Source:UniProtKB/Swiss-Prot;Acc:Q9FXB2]
AT2G42540	COR15A	Protein COLD-REGULATED 15A, chloroplastic [Source:UniProtKB/Swiss-Prot;Acc:Q42512]
AT1G05100	MAPKKK18	Mitogen-activated protein kinase kinase kinase 18 [Source:UniProtKB/Swiss-Prot;Acc:Q9ZVP5]
AT5G59220	SAG113	Probable protein phosphatase 2C 78 [Source:UniProtKB/Swiss-Prot;Acc:Q9FIF5]
KEGG | KEGG:00052: Galactose metabolism Padj = 4.097x10-2
Gene_ID	Name	Description
AT1G09350	GOLS3	Hexosyltransferase (Fragment) [Source:UniProtKB/TrEMBL;Acc:W8PVD7]
AT1G56600	GOLS2	Galactinol synthase 2 [Source:UniProtKB/Swiss-Prot;Acc:Q9FXB2]
